# Supplementary material for: Influence of surgical margin width on survival rate after resection of intrahepatic cholangiocarcinoma: a systematic review and meta-analysis
Source: PubMed Central journal article supplement — BMJ Open. 2023 May 8;13(5):e067222. doi: 10.1136/bmjopen-2022-067222 (PMC10174020; doi:10.1136/bmjopen-2022-067222), 2023-05-08
Supplement: bmjopen-2022-067222.draft_revisions.pdf [file bmjopen-2022-067222.draft_revisions.pdf]

# BMJ Open

BMJ Open is committed to open peer review. As part of this commitment we make the peer review history of every article we publish publicly available.

When an article is published we post the peer reviewers' comments and the authors' responses online. We also post the versions of the paper that were used during peer review. These are the versions that the peer review comments apply to.

The versions of the paper that follow are the versions that were submitted during the peer review process. They are not the versions of record or the final published versions. They should not be cited or distributed as the published version of this manuscript.

BMJ Open is an open access journal and the full, final, typeset and author-corrected version of record of the manuscript is available on our site with no access controls, subscription charges or pay-per-view fees (<http://bmjopen.bmj.com>).

If you have any questions on BMJ Open's open peer review process please email [info.bmjopen@bmj.com](mailto:info.bmjopen@bmj.com)

# BMJ Open

## **Influence of surgical margin width on survival rate after resection of intrahepatic cholangiocarcinoma: a systematic review and meta-analysis**

|                               |                                                                                                                                                                                                                                                                                      |
|-------------------------------|--------------------------------------------------------------------------------------------------------------------------------------------------------------------------------------------------------------------------------------------------------------------------------------|
| Journal:                      | <i>BMJ Open</i>                                                                                                                                                                                                                                                                      |
| Manuscript ID                 | bmjopen-2022-067222                                                                                                                                                                                                                                                                  |
| Article Type:                 | Original research                                                                                                                                                                                                                                                                    |
| Date Submitted by the Author: | 18-Aug-2022                                                                                                                                                                                                                                                                          |
| Complete List of Authors:     | Jiang, Jing-Hua; Zhejiang University School of Medicine, Department of Hepatobiliary<br>Fang, Da-Zhang; Zhejiang University School of Medicine, Department of Hepatobiliary<br>Hu, Yi-Ting; Shulan International Medical College, Department of Hepatobiliary and Pancreatic Surgery |
| Keywords:                     | Hepatobiliary disease < GASTROENTEROLOGY, Hepatology < INTERNAL MEDICINE, Hepatobiliary tumours < ONCOLOGY                                                                                                                                                                           |
|                               |                                                                                                                                                                                                                                                                                      |

SCHOLARONE™  
Manuscripts

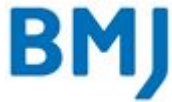

I, the Submitting Author has the right to grant and does grant on behalf of all authors of the Work (as defined in the below author licence), an exclusive licence and/or a non-exclusive licence for contributions from authors who are: i) UK Crown employees; ii) where BMJ has agreed a CC-BY licence shall apply, and/or iii) in accordance with the terms applicable for US Federal Government officers or employees acting as part of their official duties; on a worldwide, perpetual, irrevocable, royalty-free basis to BMJ Publishing Group Ltd ("BMJ") its licensees and where the relevant Journal is co-owned by BMJ to the co-owners of the Journal, to publish the Work in this journal and any other BMJ products and to exploit all rights, as set out in our [licence](#).

The Submitting Author accepts and understands that any supply made under these terms is made by BMJ to the Submitting Author unless you are acting as an employee on behalf of your employer or a postgraduate student of an affiliated institution which is paying any applicable article publishing charge ("APC") for Open Access articles. Where the Submitting Author wishes to make the Work available on an Open Access basis (and intends to pay the relevant APC), the terms of reuse of such Open Access shall be governed by a Creative Commons licence – details of these licences and which [Creative Commons](#) licence will apply to this Work are set out in our licence referred to above.

Other than as permitted in any relevant BMJ Author's Self Archiving Policies, I confirm this Work has not been accepted for publication elsewhere, is not being considered for publication elsewhere and does not duplicate material already published. I confirm all authors consent to publication of this Work and authorise the granting of this licence.

1  
2  
3  
4 **Influence of surgical margin width on survival rate after**  
5  
6 **resection of intrahepatic cholangiocarcinoma: a systematic**  
7  
8 **review and meta-analysis**  
9  
10

11  
12  
13 **Authors:**

14 Jing-Hua Jiang <sup>1</sup>, Da-Zhang Fang <sup>1</sup>, Yi-Ting Hu <sup>2\*</sup>.

15  
16  
17 **Affiliation:**

- 18  
19 1. Department of Hepatobiliary and Pancreatic Surgery, Affiliated Jinhua Hospital,  
20 Zhejiang University School of Medicine, Jinhua 321000, China.  
21  
22 2. Department of Hepatobiliary and Pancreatic Surgery, Shulan (Hangzhou) Hospital,  
23 Zhejiang Shuren University, Shulan International Medical College, Hangzhou  
24 310022, China.  
25  
26  
27

28 **\*Corresponding Author Information:** DR. Yi-Ting Hu. Department of Hepatobiliary  
29 and Pancreatic Surgery, Shulan (Hangzhou) Hospital, Zhejiang Shuren University,  
30 Shulan International Medical College, Dongxin Road 848#, Hangzhou 310022, China.  
31  
32 Tel: +86-13515861057, E-mail: yitingh@yeah.net.  
33  
34  
35  
36  
37  
38  
39  
40  
41  
42  
43  
44  
45  
46  
47  
48  
49  
50  
51  
52  
53  
54  
55  
56  
57  
58  
59  
60

## Abstract

**Objective:** This study attempted to investigate the effect different surgical margin widths on the prognoses of ICC patients after liver resection.

**Methods:** Published English cohort studies relating to the impact of surgical margin width on ICC patient prognosis in PubMed, Embase and Web of Science databases available by June 2022 were all retrieved and collected. This study analyzed hazard ratio(HR) and confidential interval(95%CI) of overall survival(OS), disease-free survival(DFS), recurrence-free survival(RFS) across the included studies, the quality of the papers was assessed by the Newcastle-Ottawa scale(NOS). The forest plots of hazard ratio and 95%CI were drawn by Stata software. A sensitivity analysis was then adopted to reassure the stability of the results.

**Results:** In 9 included studies, R0 resection margins were achieved in 2158 out of 2404 patients. Among 2158 patients, there were 770(35.68%) with a wide margin ( $\geq 10$  mm), and 1388(64.32%) with a narrow margin ( $< 10$  mm). With the wide margin group ( $\geq 10$  mm) as the control, pooled HR of OS in the narrow margin group ( $< 10$  mm) was 1.54(95%CI: 1.34-1.77). HR of OS in three subgroups where the margin was less than 5 mm, or ranges from 5 mm to 9 mm, or less than 10 mm in length were 1.88(95%CI: 1.45-2.42), 1.33(95% CI: 1.03-1.72), 1.49(95%CI: 1.20-1.84), respectively. Pooled HR of DFS in the narrow margin group ( $< 10$  mm) was 1.51(95%CI: 1.14-2.00). Pooled HR of RFS in the narrow margin group ( $< 10$  mm) was 1.35(95% CI: 1.19-1.54). HR of RFS in three subgroups where the margin was less than 5 mm, or ranges from 5 mm to 9 mm, or less than 10 mm in length were 1.38(95%CI: 1.07-1.78), 1.39(95%CI: 1.11-1.74), 1.30(95%CI: 1.06-1.60), respectively.

**Conclusion:** Among ICC patients who received curative hepatectomy with R0 margin, we found those with margins  $\geq 10$  mm had survival advantages over the rest up to a point.

**Keywords:** intrahepatic cholangiocarcinoma; surgical margin width; prognosis survival rate; meta-analysis

## Introduction

Intrahepatic cholangiocarcinoma (ICC) is the second most common primary malignancy originating in the liver, which makes up 10%-15% of primary liver cancers. However, without distinct pathogenic factors or clinicopathological features, the diagnosis of ICC tends to be hard<sup>1,2</sup>. Most patients have to receive hepatobiliary resection since they have progressed to the advanced stage of ICC<sup>3</sup>. Limited knowledge about its pathological features also adds difficulty to the prognosis of ICC patients. Even after the radical surgery, the recurrence rate remains high and the 5-year survival rate ranges from only 30-35%. The past three decades have seen the incidence and mortality rate of ICC keep elevating while with rather poor prognosis<sup>4</sup>.

Since radical hepatic resection remains the best curative treatment for ICC patients<sup>3</sup>, efforts should be spared in seeking optimal surgical management and other factors that can enable a better prognosis. Among the incomplete list of factors purposed by current studies to affect the prognosis of ICC patients, the width of the surgical margin is one controversial factor<sup>4,5</sup>. Some research observed that ICC patients with surgical margin width  $\geq 10$  mm are likely to have a better prognosis than those with surgical margin width less than 10 mm. Yet contrary research refuted the observation by demonstrating that the surgical margin width did not apply to every ICC patient. Since these studies only include limited samples or only focus on overall survival (OS), their conclusions have not been extensively applied yet<sup>6</sup>. Unlike tumor status, lymph node metastasis and lymph node dissection, surgical margin width is the one and only factor that can be controlled during ICC treatment. Hence, finding an optimal surgical margin width carries great clinical ramifications. Tang *et al.*<sup>7</sup> published a meta-analysis about the influence of surgical margins on the prognoses of ICC patients in 2016. Their research included the hazard ratio (HR) of OS in six retrospective cohort studies, and compares the prognoses of patients with different margin widths with the cutoff value of 10 mm. But still, its absence of disease-free survival (DFS), recurrence-free survival (RFS) and new cohort studies released during the seven years after its publication

renders their research too dated to guide future clinical treatment.

Therefore, this research attempted to update the prior meta-analysis by including studies published in the past seven years that concerns OS, DFS and RFS of ICC patients. Hopefully, the research will provide compelling evidence for the discussion of the optimal surgical margin width.

## 1. Materials and Methods

### 1.1 Inclusion Criteria

(1) ICC patients (confirmed by pathological examination) received potentially curative hepatectomy; (2) Patients underwent R0 resection (which was defined as the distance between the nontumorous tissue and cancer cells  $>1$  mm)<sup>2</sup> with clear surgical margin edge; (3) Patients were classified according to the width of the resection margin, defined as the shortest distance from the edge of the tumor to the line of resection<sup>5</sup>. Patients with margin widths shorter than 4 mm or ranging from 5-10 mm were included in the narrow margin group ( $<10$  mm), and those with margin widths equal to 10 mm or above were included in the wide margin group ( $\geq 10$  mm); (4) With wide margin group as the control, HR and 95% confidential interval (CI) of DFS, RFS, OS in 1-4 mm margin group and 5-9 mm margin group were either available in included studies or can be calculated from HR Excel spreadsheet by using survival curves like Tierney<sup>8</sup>.

### 1.2 Exclusion Criteria

(1) Abstract, literature reviews, pathological reports, editorials and expert reviews; (2) Studies published repeatedly; (3) Study results reached not through calculation; (4) Animal studies; (5) Studies group patients with different cutoff points instead of 5 mm and 10 mm; (6) Repeat resection for recurrence; (7) Patients with extrahepatic metastases.

### 1.3 Study Search Strategy

Systematic research was completed in PubMed, Embase and Web of Science to collect relevant studies available by June 2022. We searched with a combination of medical research (MeSH) terms and free text terms, including “intrahepatic

1  
2  
3  
4  
5  
6  
7  
8  
9  
10  
11  
12  
13  
14  
15  
16  
17  
18  
19  
20  
21  
22  
23  
24  
25  
26  
27  
28  
29  
30  
31  
32  
33  
34  
35  
36  
37  
38  
39  
40  
41  
42  
43  
44  
45  
46  
47  
48  
49  
50  
51  
52  
53  
54  
55  
56  
57  
58  
59  
60

cholangiocellular carcinoma”, “intrahepatic cholangiocarcinoma”, “surgical margin length” and “margins of excision”. The reference lists of included studies were manually examined for potential studies that met the inclusion criteria.

#### 1.4 Study Selection

We selected studies by (1) basic information like title, first author, publication year, nation, and the time of research; (2) baseline characteristics like sample size, disease, average age, and sex; (3) key factors that bias hazard ratio evaluation; (4) outcome indicators and measured data.

#### 1.5 Data Extraction

To minimize bias, we had two investigators select studies and extract data in duplicate independently and then adopted cross-validation to measure their accuracy. Disagreement was settled by further discussion or judged by the third investigator. Subsequently, a data extraction sheet designed for this study was used to abstract the following information: (1) basic information about included studies like first author, publication year, nation, type of article, and research period; (2) baseline characteristics about included cohort like number, sex, age, margin width, cutoff points, size of each group, and the longest follow-up time; (3) indicators of surgery like techniques and instruments of liver parenchyma transection; (4) outcome indicators like HR and corresponding 95%CI of DFS, RFS and OS.

#### 1.6 Quality Assessment of Included Studies

Included studies were evaluated by two investigators using the Newcastle-Ottawa Scale (NOS), an assessment scale covering eight items including the selection of the study groups; the comparability of the groups; and the ascertainment of either the exposure or outcome of interest for case-control or cohort studies respectively. Any disagreement in assessment was resolved by the third investigator.

#### 1.7 Statistical Analysis

We used Stata MP16 software to conduct statistical analysis. Between-study heterogeneity was tested by Chi-squared ( $X^2$ ) test ( $\alpha=0.1$ ) and further evaluated using  $I^2$ . When  $I^2 \leq 50\%$ , a fixed effect model of the meta-analysis was employed; when  $I^2 > 50\%$ , a random effect model was used to analyze possible reasons, together with



sub-group and descriptive analysis. If heterogeneity arises from poor research quality, sensitivity analysis ensued to evaluate the stability and certainty of meta-analysis. The publication bias was analyzed by funnel plot. If the funnel plot was symmetrical, there was no publication bias. The inspection level of meta-analysis was set as  $\alpha=0.05$ .

## 2. Results

### 2.1 Selected Studies and Quality Assessment

Preliminary research returned 73 relevant studies (34 from Pubmed; 28 from Embase; 11 from Web of Science). After screening the title and abstract of these entries identified in the search, 24 studies were retained. Eventually, 9 studies were included after reading their full-text publications. Among these included studies published from 2008 to 2021, 3 were conducted in China, 1 in Austria, 1 in Korea, 1 in France, 2 in USA and 1 in Japan. The PRISMA flow chart for included studies was presented in Figure 1. NOS scores of included studies in Table 1 showed that top-rated retrospective cohort studies were of high quality.

**Table 1. Quality assessment of included studies**

| Study          | Selection |   |   |   | Comparability | Outcome |   |    | Score     |
|----------------|-----------|---|---|---|---------------|---------|---|----|-----------|
|                | A         | B | C | D |               | E       | F | G  |           |
| Tamandl2008    | *         | * | * | * | *             | *       | * | *  | <b>8</b>  |
| Cho2010        | *         | * | * | * | *             | *       | * |    | <b>7</b>  |
| Farges2011     | *         | * | * | * | *             | *       | * | *  | <b>8</b>  |
| Spolverato2015 | *         | * | * | * | *             | *       | * | *  | <b>8</b>  |
| Ma2016         | *         | * | * | * | *             | *       | * | *  | <b>8</b>  |
| Tang2016       | *         | * | * | * | *             | *       | * | *  | <b>8</b>  |
| Watanabe2020   | *         | * | * | * | **            | *       | * | ** | <b>10</b> |
| Bartsch2020    | *         | * | * | * | *             | *       | * |    | <b>7</b>  |
| Zhu2020        | *         | * | * | * | **            | *       |   |    | <b>6</b>  |
| Liu2021        | *         | * | * | * | *             | *       | * | *  | <b>8</b>  |

\* A maximum of 2 stars can be allotted in this category, one for age, and the other for other controlled

factors.

A: Representativeness of the exposed cohort

B: Selection of the non-exposed cohort

C: Ascertainment of exposure

D: Demonstration that outcome of interest was not present at start of study

E: Comparability of cohorts based on the design or analysis

F: Assessment of outcome

G: Was follow-up long enough for outcomes to occur

H: Adequacy of follow-up of cohorts

## 2.2 Characteristics of Included Studies

2158 out of 2404 reporting ICC patients in included studies underwent R0 resection, and among them, 770 (35.68%) were with wide surgical margin, 1388 (64.32%) with narrow margin. Most involved patients aged around 60. Majority of resections were done with modern technology or dissection devices, such as Cavitron ultrasonic surgical attractor or ultrasonic dissector. The baseline characteristics of narrow (<10 mm) and wide ( $\geq 10$  mm) margin groups were similar across the 9 included studies. The follow-up length ranges from 1 to 84 months. Detailed information is available in Table 2.

**Table 2. Patients' characteristics of 9 cohorts**

| Author         | Year | Nation  | No. of Patient | Age, $M(Q_{25}\sim Q_{75})$ | Sex, male (%) | Follow-Up, Mouth | Resection width |       |
|----------------|------|---------|----------------|-----------------------------|---------------|------------------|-----------------|-------|
|                |      |         |                |                             |               |                  | $\geq 10$ mm    | <10mm |
| Tamandl        | 2008 | Austria | 74             | 63.2 (33.3-85.8)            | 29(39)        | 1-64             | 15              | 38    |
| Cho            | 2010 | Korea   | 63             | 61.4(27-82)                 | 41(65)        | NA               | 23              | 40    |
| Farges         | 2011 | France  | 212            | NA                          | 108(51)       | NA               | 45              | 116   |
| Spolverato     | 2015 | USA     | 583            | NA                          | 302(52)       | NA               | 174             | 266   |
| Ma             | 2016 | China   | 107            | 61 (25-79)                  | 58(54)        | 1-60             | 25              | 50    |
| Zhu            | 2020 | China   | 126            | NA                          | 66(52)        | 1-54             | 34              | 92    |
| <b>Watanab</b> | 2020 | Japan   | 635            | 64.2(32.3-84.4)             | 388(61)       | 1-84             | 237             | 398   |

| e              |      |       |      |            |          |      |     |      |  |
|----------------|------|-------|------|------------|----------|------|-----|------|--|
| <b>Bartsch</b> | 2020 | USA   | 126  | NA         | NA       | 0-24 | 22  | 109  |  |
| Liu            | 2021 | China | 478  | 58 (49-64) | 287(60)  | NA   | 195 | 283  |  |
| Total          |      |       | 2404 |            | 1279(56) |      | 770 | 1388 |  |

## 2.3 Meta-analysis Results

### 2.3.1 OS

9 included studies all related to the influence of surgical margin width on the OS of ICC patients. This meta-analysis synthesized relevant data by categorizing margin width into <10 mm and  $\geq 10$  mm groups, and the former was further categorized into three subgroups: <5 mm (1-4 mm, three studies) 5-9 mm ( $\geq 5$  mm, three studies) and <10 mm (five studies). There was no overall heterogeneity in the included studies ( $I^2=14.6\%$ ,  $P=0.305$ ). The fixed effect model meta-analysis indicated that, compared with the wide margin group ( $\geq 10$  mm), pooled HR of the narrow margin group (<10 mm) stood at 1.54 (95%CI: 1.34-1.77). No significant heterogeneity was found across three subgroups, <5 mm ( $I^2=0.0\%$ ,  $P=0.839$ ), 5-9 mm ( $I^2=0.0\%$ ,  $P=0.394$ ), and <10 mm ( $I^2=31.8\%$ ,  $P=0.209$ ) groups. Compared with the wide margin group, pooled HR of three subgroups (<5 mm, 5-9 mm and <10 mm groups) were 1.88 (95%CI: 1.45-2.42), 1.33 (95%CI: 1.03-1.72) and 1.49 (95%CI: 1.20-1.84), respectively, as Figure 2 showed.

### 2.3.2 DFS

Two included studies relating to the influence of margin width on DFS of ICC patients showed no overall heterogeneity ( $I^2=0.0\%$ ,  $P=0.926$ ). According to the result of the fixed effect model in Figure 3, with the wide margin group ( $\geq 10$  mm) as the control, the overall pooled HR of the narrow margin group (<10 mm) was 1.51 (95%CI: 1.14-2.00) (Figure 3).

### 2.3.3 RFS

With five included studies concerning the influence of margin width on RFS of

1  
2  
3  
4 ICC patients, we categorized the outcome variable in the same way as we conducted  
5 study on OS. With no heterogeneity across the included studies ( $I^2=0.0\%$ ,  $P=0.443$ ),  
6 the pooled HR was 1.35 (95%CI: 1.19-1.54). The fixed effect model of subgroup  
7 analysis found no heterogeneity across  $<5$  mm ( $I^2=0.0\%$ ,  $P=0.576$ ) and 5-9 mm  
8 ( $I^2=0.0\%$ ,  $P=0.450$ ) groups. Compared with the wide margin group ( $\geq 10$  mm), pooled  
9 HR of  $<5$  mm and 5-9 mm groups were 1.38 (95%CI: 1.07-1.78) and 1.39 (95%CI:  
10 1.11-1.74), respectively. With heterogeneity ( $I^2=57.7\%$ ,  $P=0.094$ ) in the narrow margin  
11 ( $<10$  mm) group, compared with the wide margin ( $\geq 10$  mm) group, the pooled HR of  
12 the narrow margin group was found to be 1.30 (95%CI: 1.06-1.60) in comparison with  
13 the wide margin group ( $\geq 10$  mm) (Figure 4).  
14  
15  
16  
17  
18  
19  
20  
21  
22  
23  
24

## 25 2.4 Sensitivity Analysis

26  
27 By excluding one study at a time, sensitivity analysis of OS and RFS was  
28 conducted. Results in Figure 5,6 showed no significant difference between the effect  
29 size and the total effect size of OS and RFS, implying that the result reached in this  
30 study was relatively stable.  
31  
32  
33  
34  
35  
36

## 37 3. Discussion

38  
39 The incidence and mortality rates of ICC keep climbing across the world. Since  
40 neither risk factors nor early-stage clinical features are made clear about ICC, most  
41 patients are not diagnosed until ICC reached an advanced stage<sup>1</sup>. Though liver resection  
42 is the best potentially curative treatment ICC patients could choose, the five-year  
43 survival rate after surgery still ranges from 21% to 35%<sup>9</sup>. With impacts of surgical  
44 margin width on the prognoses of patients being noticed recently, surgeons expect a  
45 margin width that could optimize prognosis.  
46  
47  
48  
49  
50  
51  
52

53 R0 is acknowledged to be more effective than R1, yet the effect of margin width  
54 in R0 resection on prognoses of ICC patients is still under debate. In 2016, Tang *et al.*<sup>7</sup>  
55 carried out a meta-analysis relating to the influence of margin width on the prognoses  
56 of ICC patients, indicating that patients with wide margin ( $\geq 10$  mm) have a survival  
57  
58  
59  
60

1  
2  
3  
4 advantage over those with narrow margin (<10 mm) (HR: 1.59, 95%CI: 1.09-2.32).  
5  
6 Our study further included relevant studies released during 2016-2022 to the 2016  
7  
8 meta-analysis. Two irrelevant studies with a limited sample size in the 2016 meta-  
9  
10 analysis were excluded and five eligible retrospective cohort studies published after  
11  
12 2016 were included. Besides, this study also filled the void of RFS (4 included studies)  
13  
14 and DFS (2 included studies).

15  
16 9 included studies all focused on the mass-forming (MF) type of ICC ( as it  
17  
18 accounts for over 66% of ICC<sup>1</sup>) and categorized the outcome variable into 5 groups: <1  
19  
20 mm, 1-4 mm, 5-9 mm, <10 mm and  $\geq 10$  mm. One included study went beyond our  
21  
22 research scope as it further categorized wide margin into  $\geq 15$  mm group, and relevant  
23  
24 data were excluded from the meta-analysis. Pooled HR results indicated that with the  
25  
26 wide margin ( $\geq 10$  mm) group as the control, patients with a margin shorter than 10 mm  
27  
28 were prone to poor prognosis (pooled HR of OS: 1.54, 95%CI: 1.34-1.77). It was  
29  
30 demonstrated that ICC tumor cells could metastasize by directly infiltrating the adjacent  
31  
32 liver parenchyma, accompanied by vascular infiltration and perineural infiltration, and  
33  
34 then cause pathological changes of intrahepatic epithelial cells and surrounding  
35  
36 tissues<sup>10</sup>. For most metastasis is limited within 10 mm around the primary lesion, a 10  
37  
38 mm or more resection is expected to cure these ICC patients. Ma *et al.*<sup>2</sup> suggested in  
39  
40 their study in 2016 that margin width significantly impacts the OS of ICC-MF patients  
41  
42 after resection. With the margin width greater than 9 mm, OS increased from 35.7  
43  
44 months to 184.6 months. With the margin width of or greater than 10 mm, DFS  
45  
46 increased from 14.1 months to 86 months. The above results were consistent with the  
47  
48 conclusion reached in the 2016 meta-analysis that  $\geq 10$  mm could be the optimal margin  
49  
50 width for prognosis. The conclusion was further confirmed in the single-center research  
51  
52 by Zhu *et al.*<sup>11</sup> in 2020. Their research results showed that a resection margin  $\geq 10$  mm  
53  
54 means favorable OS (HR: 0.403; 95% CI: 0.191-0.854;  $P=0.018$ ) and RFS (HR: 0.470;  
55  
56 95% CI: 0.242-0.914;  $P=0.026$ ). Our study indirectly verified the above conclusions  
57  
58 from another perspective. According to OS subgroup analysis results, pooled HR of the  
59  
60 <5 mm group and 5-9 mm group were 1.88 (95%CI: 1.45-2.42) and 1.33 (95%CI: 1.03-  
1.72), respectively. Apparently, the 5-9 mm group has a much lower prognostic risk.

1  
2  
3  
4 However, such a remarkable difference was observed in the RFS subgroup analysis,  
5 where pooled HR of the <5 mm group and 5-9 mm group were 1.38 (95%CI: 1.07-1.78)  
6 and 1.39 (95%CI: 1.11-1.74), respectively.  
7  
8

9  
10 Though sensitivity analysis results indicated no significant difference across  
11 studies, the exclusion of 5-9 mm group by Spolverato (2015) in OS analysis and the  
12 exclusion of <10 mm group by Tamandl (2008) in RFS analysis led to relatively notable  
13 difference. Reviewing the study conducted by Spolverato *et al.* in 2015, we found the  
14 1-year OS rate among 100 patients with 5-9 mm R0 margin (83.9%) was higher than  
15 that (79.8%) of 147 patients with  $\geq 10$  mm R0 margin. This may be the major factor that  
16 impacts the OS rate. As for the study conducted by Tamandl (2008) *et al.*, margin width  
17 (1-10 mm, >10 mm) is found to bear little relation to OS or RFS of patients. Such results  
18 may be attributed to its study cohort, among whom tumor type, size and lymph node  
19 metastasis vary greatly. These explanations were subsequently confirmed in the  
20 following studies. The study cohort of the research conducted by Liu *et al.*<sup>12</sup> in 2021  
21 consisted of 478 ICC patients from 13 major Hepato-Biliary and Pancreatic centers in  
22 China. They conducted a 1:1 propensity score matching (PSM) analysis to match the  
23 prognostic factors like age, type of tumor, and lymph node metastasis, and left margin  
24 width as the only outcome variable (cutoff point is 10mm). Results indicated improved  
25 OS and DFS in the wide margin group than the narrow margin group. The study also  
26 found that in its unpaired subgroup analysis, a wide margin only benefits the American  
27 Joint Committee on Cancer (AJCC) stage I ICC patients, not the patients with lymphatic  
28 metastasis. Watanabe *et al.* (2020)<sup>6</sup> also observed in their study that wide margin width  
29 could impact prognosis. However, a closer review of its patient characteristics found  
30 that a higher proportion of single tumor patients and shorter tumor diameter among the  
31 wide margin group, while the narrow margin group who suffers from larger and more  
32 invasive tumors appear with a greater prevalence of vascular invasion and advanced  
33 tumor. These factors are likely to confuse the survival comparison between two groups.  
34 The study also pointed out that a wide margin will not bring benefits to patients with  
35 lymphatic metastasis, and may increase the risk of adverse complications such as  
36 postoperative hemorrhage and liver failure. Taken together above-mentioned analysis,  
37  
38  
39  
40  
41  
42  
43  
44  
45  
46  
47  
48  
49  
50  
51  
52  
53  
54  
55  
56  
57  
58  
59  
60

1  
2  
3  
4 the surgeon should take tumor type and lymphatic involvement into consideration when  
5 completing a margin width of or greater than 10 mm. A margin width greater than 10  
6 mm would benefit MF-ICC patients and patients without lymph node metastasis.  
7 Unfortunately, there are several limitations in this study. The type of liver resection  
8 (anatomical or non-anatomical), surgical instruments (Cavitron ultrasonic surgical  
9 attractor may cause in situ damage to the cutting edge and liver tissue necrosis<sup>6</sup>) and  
10 the control of chemotherapy drugs on tumors (some studies show that chemotherapy  
11 drugs could control 60-80% of tumor progression<sup>6</sup>) were not analyzed in subgroups.  
12 Future studies are required to answer how these above-mentioned factors may influence  
13 the prognosis of ICC patients.  
14  
15  
16  
17  
18  
19  
20  
21  
22

23 In a nutshell, the meta-analysis confirmed that among ICC patients undergoing  
24 curative hepatectomy, those with a margin width  $\geq 10$  mm had survival advantages over  
25 those with a margin width  $< 10$  mm. However, surgeons should take individual  
26 conditions into consideration in determining the margin width. Margin width  $< 10$  mm  
27 should not be regarded as a surgical taboo. In sum, while surgeons should try to achieve  
28 a surgical margin  $\geq 10$  mm, further support from the results of multicenter and high-  
29 quality randomized controlled trials is still needed to ensure a better prognosis and  
30 longer survival time for patients.  
31  
32  
33  
34  
35  
36  
37  
38  
39  
40  
41  
42  
43  
44  
45  
46  
47  
48  
49  
50  
51  
52  
53  
54  
55  
56  
57  
58  
59  
60

## **Declarations**

### **Patient and Public Involvement**

No patient involved.

### **Ethics approval and consent to participate**

Not applicable.

### **Consent for publication**

All authors consent to submit the manuscript for publication.

### **Availability of data and materials**

The data used to support the findings of this study are included within the article.

### **Competing interest**

The authors declare no conflicts of interest.

### **Funding**

Not applicable.

### **Authors' contributions**

All authors contributed to data analysis, drafting and revising the article, gave final approval of the version to be published, and agreed to be accountable for all aspects of the work.

### **Acknowledgments**

Not applicable.



## Reference

- 1 Cho, S. Y. *et al.* Survival analysis of intrahepatic cholangiocarcinoma after resection. *Ann Surg Oncol* **17**, 1823-1830, doi:10.1245/s10434-010-0938-y (2010).
- 2 Ma, K. W. *et al.* The effect of wide resection margin in patients with intrahepatic cholangiocarcinoma: A single-center experience. *Medicine (Baltimore)* **95**, e4133, doi:10.1097/MD.0000000000004133 (2016).
- 3 Tamandl, D. *et al.* Influence of hepatic resection margin on recurrence and survival in intrahepatic cholangiocarcinoma. *Ann Surg Oncol* **15**, 2787-2794, doi:10.1245/s10434-008-0081-1 (2008).
- 4 Farges, O. *et al.* Influence of surgical margins on outcome in patients with intrahepatic cholangiocarcinoma: a multicenter study by the AFC-IHCC-2009 study group. *Ann Surg* **254**, 824-829; discussion 830, doi:10.1097/SLA.0b013e318236c21d (2011).
- 5 Spolverato, G. *et al.* The Impact of Surgical Margin Status on Long-Term Outcome After Resection for Intrahepatic Cholangiocarcinoma. *Ann Surg Oncol* **22**, 4020-4028, doi:10.1245/s10434-015-4472-9 (2015).
- 6 Watanabe, Y. *et al.* Effect of surgical margin width after R0 resection for intrahepatic cholangiocarcinoma: A nationwide survey of the Liver Cancer Study Group of Japan. *Surgery* **167**, 793-802, doi:10.1016/j.surg.2019.12.009 (2020).
- 7 Tang, H., Lu, W., Li, B., Meng, X. & Dong, J. Influence of surgical margins on overall survival after resection of intrahepatic cholangiocarcinoma: A meta-analysis. *Medicine (Baltimore)* **95**, e4621, doi:10.1097/MD.0000000000004621 (2016).
- 8 Tierney, J. F., Stewart, L. A., Ghersi, D., Burdett, S. & Sydes, M. R. Practical methods for incorporating summary time-to-event data into meta-analysis. *Trials* **8**, 16, doi:10.1186/1745-6215-8-16 (2007).
- 9 Bartsch, F. *et al.* Intrahepatic cholangiocarcinoma - influence of resection margin and tumor distance to the liver capsule on survival. *BMC Surg* **20**, 61, doi:10.1186/s12893-020-00718-7 (2020).
- 10 El-Diwany, R., Pawlik, T. M. & Ejaz, A. Intrahepatic Cholangiocarcinoma. *Surg Oncol Clin N Am* **28**, 587-599, doi:10.1016/j.soc.2019.06.002 (2019).
- 11 Zhu, H. *et al.* Prognostic value of resection margin length after surgical resection for intrahepatic cholangiocarcinoma. *Am J Surg* **222**, 383-389, doi:10.1016/j.amjsurg.2020.12.022 (2021).
- 12 Liu, H. *et al.* Impact of surgical margin width on long-term outcomes for intrahepatic cholangiocarcinoma: a multicenter study. *BMC Cancer* **21**, 840, doi:10.1186/s12885-021-08560-7 (2021).

## Figure legends

**Figure 1 PRISMA flow chart for the included studies**

1  
2  
3  
4 **Figure 2 Results of HR pooled analysis of the OS rate of the included studies (with the wide**  
5 **margin group  $\geq 10$  mm as the control)**  
6

7 **Figure 3 Results of HR pooled analysis of DFS in the included studies (with wide margin group**  
8  **$\geq 10$  mm as the control)**  
9

10 **Figure 4 Results of HR pooled analysis of RFS in the included studies (with wide margin group**  
11  **$\geq 10$  mm as the control)**  
12

13 **Figure 5 Sensitivity analysis of OS after excluding some studies**  
14

15 **Figure 6 Sensitivity analysis of RFS after excluding some studies**  
16  
17  
18  
19  
20  
21  
22  
23  
24  
25  
26  
27  
28  
29  
30  
31  
32  
33  
34  
35  
36  
37  
38  
39  
40  
41  
42  
43  
44  
45  
46  
47  
48  
49  
50  
51  
52  
53  
54  
55  
56  
57  
58  
59  
60

1  
2  
3  
4  
5  
6  
7  
8  
9  
10  
11  
12  
13  
14  
15  
16  
17  
18  
19  
20  
21  
22  
23  
24  
25  
26  
27  
28  
29  
30  
31  
32  
33  
34  
35  
36  
37  
38  
39  
40  
41  
42  
43  
44  
45  
46  
47  
48  
49  
50  
51  
52  
53  
54  
55  
56  
57  
58  
59  
60

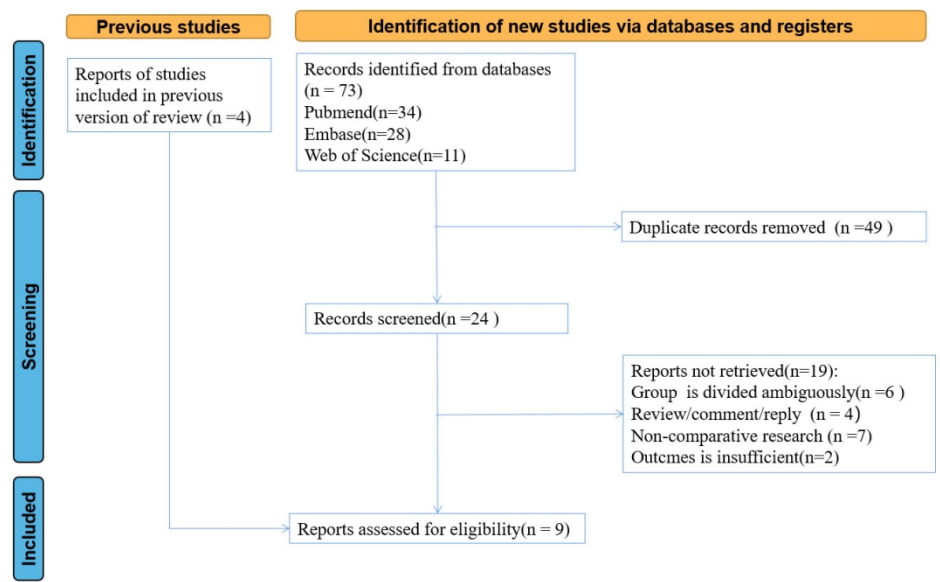

119x78mm (300 x 300 DPI)

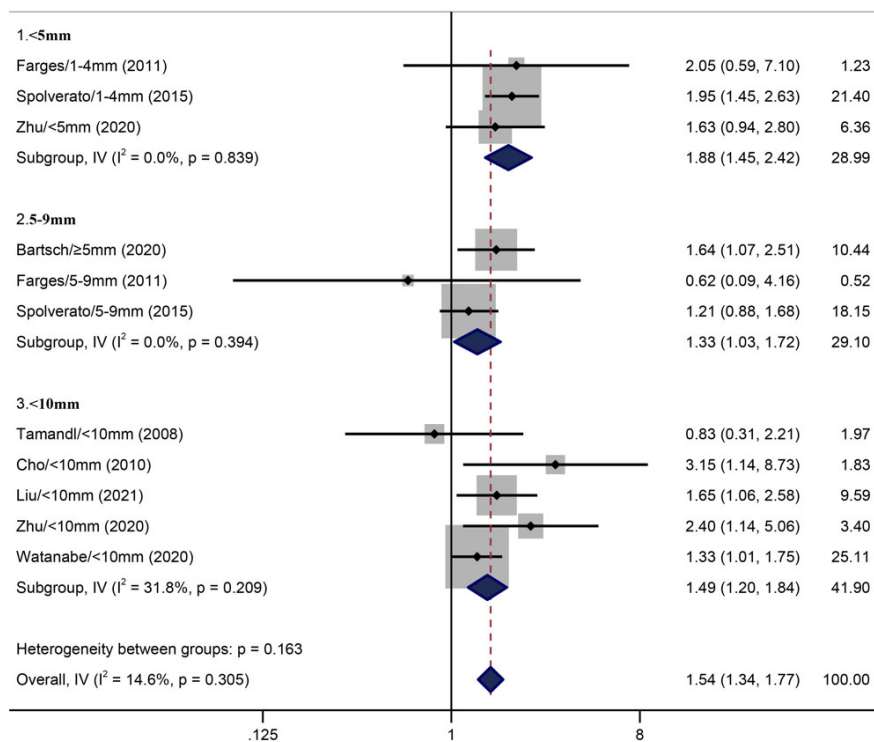

96x84mm (300 x 300 DPI)

1  
2  
3  
4  
5  
6  
7  
8  
9  
10  
11  
12  
13  
14  
15  
16  
17  
18  
19  
20  
21  
22  
23  
24  
25  
26  
27  
28  
29  
30  
31  
32  
33  
34  
35  
36  
37  
38  
39  
40  
41  
42  
43  
44  
45  
46  
47  
48  
49  
50  
51  
52  
53  
54  
55  
56  
57  
58  
59  
60

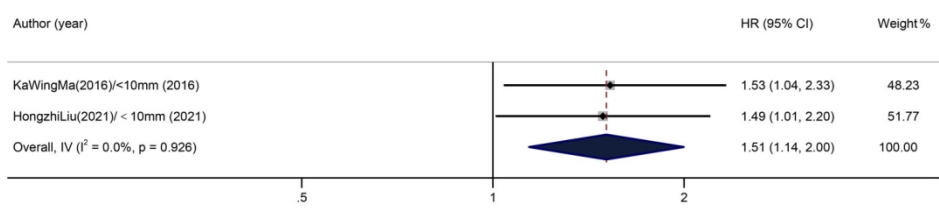

142x38mm (300 x 300 DPI)

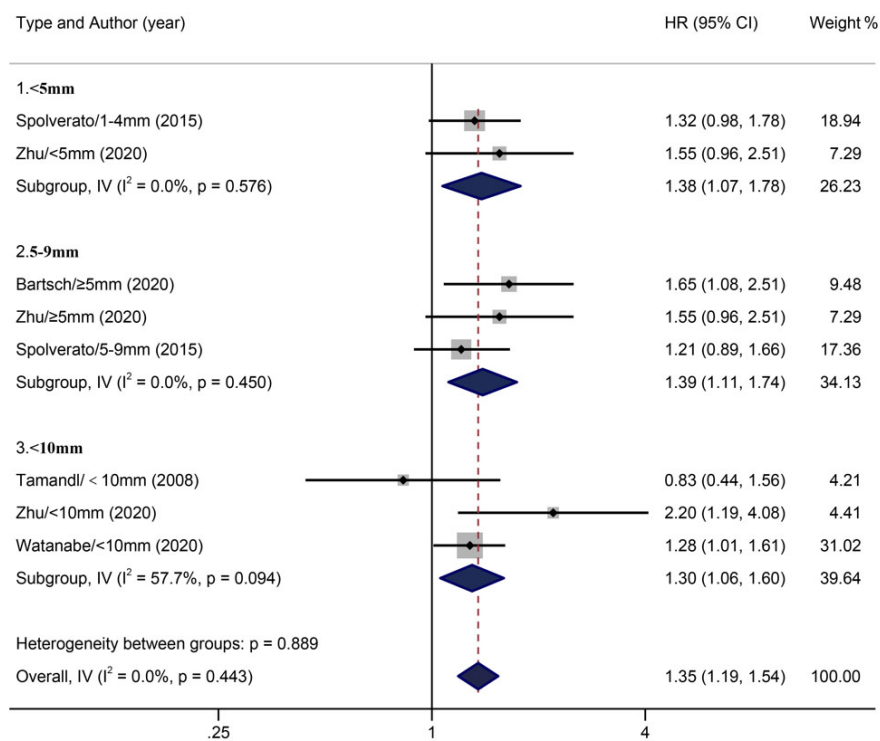

93x77mm (300 x 300 DPI)

1  
2  
3  
4  
5  
6  
7  
8  
9  
10  
11  
12  
13  
14  
15  
16  
17  
18  
19  
20  
21  
22  
23  
24  
25  
26  
27  
28  
29  
30  
31  
32  
33  
34  
35  
36  
37  
38  
39  
40  
41  
42  
43  
44  
45  
46  
47  
48  
49  
50  
51  
52  
53  
54  
55  
56  
57  
58  
59  
60

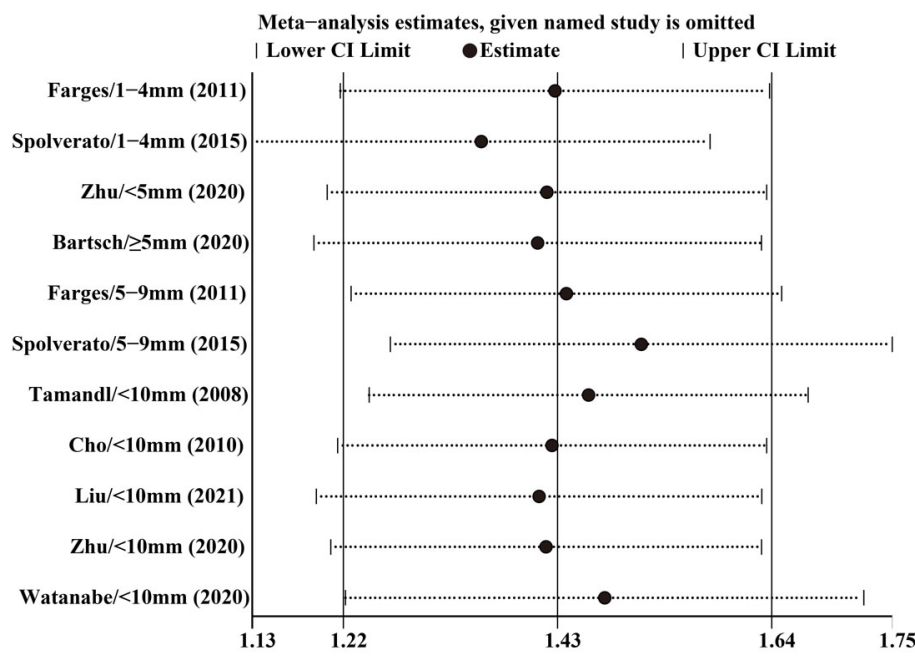

101x73mm (300 x 300 DPI)

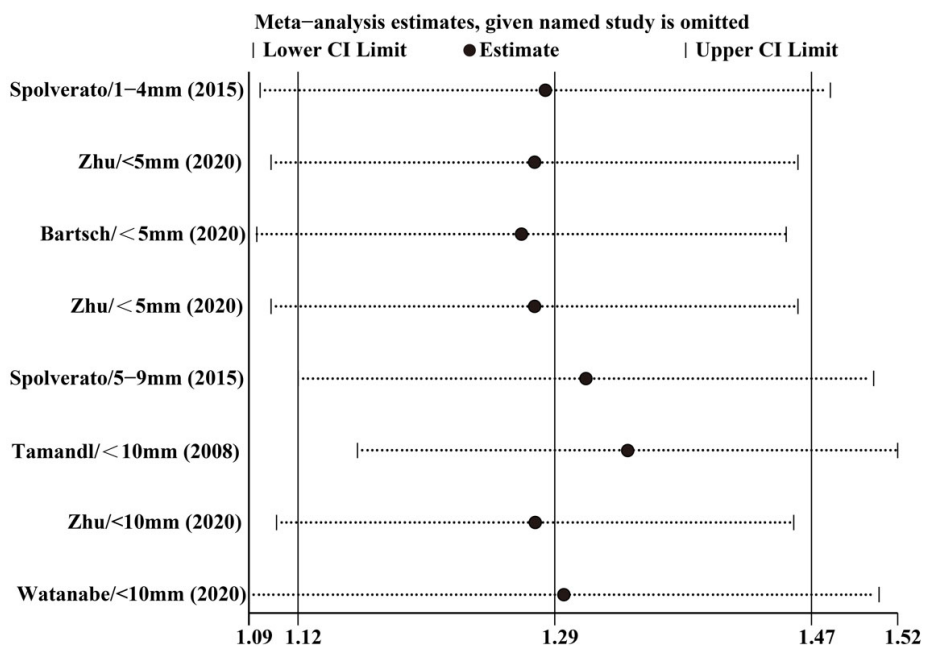

105x78mm (300 x 300 DPI)



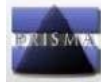

## PRISMA 2020 Checklist

| Section and Topic             | Item # | Checklist item                                                                                                                                                                                                                                                                                       | Location where item is reported |
|-------------------------------|--------|------------------------------------------------------------------------------------------------------------------------------------------------------------------------------------------------------------------------------------------------------------------------------------------------------|---------------------------------|
| <b>TITLE</b>                  |        |                                                                                                                                                                                                                                                                                                      |                                 |
| Title                         | 1      | Identify the report as a systematic review.                                                                                                                                                                                                                                                          | 1                               |
| <b>ABSTRACT</b>               |        |                                                                                                                                                                                                                                                                                                      |                                 |
| Abstract                      | 2      | See the PRISMA 2020 for Abstracts checklist.                                                                                                                                                                                                                                                         | 2                               |
| <b>INTRODUCTION</b>           |        |                                                                                                                                                                                                                                                                                                      |                                 |
| Rationale                     | 3      | Describe the rationale for the review in the context of existing knowledge.                                                                                                                                                                                                                          | 3                               |
| Objectives                    | 4      | Provide an explicit statement of the objective(s) or question(s) the review addresses.                                                                                                                                                                                                               | 4                               |
| <b>METHODS</b>                |        |                                                                                                                                                                                                                                                                                                      |                                 |
| Eligibility criteria          | 5      | Specify the inclusion and exclusion criteria for the review and how studies were grouped for the syntheses.                                                                                                                                                                                          | 5                               |
| Information sources           | 6      | Specify all databases, registers, websites, organisations, reference lists and other sources searched or consulted to identify studies. Specify the date when each source was last searched or consulted.                                                                                            | 4                               |
| Search strategy               | 7      | Present the full search strategies for all databases, registers and websites, including any filters and limits used.                                                                                                                                                                                 | 4                               |
| Selection process             | 8      | Specify the methods used to decide whether a study met the inclusion criteria of the review, including how many reviewers screened each record and each report retrieved, whether they worked independently, and if applicable, details of automation tools used in the process.                     | 5                               |
| Data collection process       | 9      | Specify the methods used to collect data from reports, including how many reviewers collected data from each report, whether they worked independently, any processes for obtaining or confirming data from study investigators, and if applicable, details of automation tools used in the process. | 5                               |
| Data items                    | 10a    | List and define all outcomes for which data were sought. Specify whether all results that were compatible with each outcome domain in each study were sought (e.g. for all measures, time points, analyses), and if not, the methods used to decide which results to collect.                        | /                               |
|                               | 10b    | List and define all other variables for which data were sought (e.g. participant and intervention characteristics, funding sources). Describe any assumptions made about any missing or unclear information.                                                                                         | /                               |
| Study risk of bias assessment | 11     | Specify the methods used to assess risk of bias in the included studies, including details of the tool(s) used, how many reviewers assessed each study and whether they worked independently, and if applicable, details of automation tools used in the process.                                    | /                               |
| Effect measures               | 12     | Specify for each outcome the effect measure(s) (e.g. risk ratio, mean difference) used in the synthesis or presentation of results.                                                                                                                                                                  | /                               |
| Synthesis methods             | 13a    | Describe the processes used to decide which studies were eligible for each synthesis (e.g. tabulating the study intervention characteristics and comparing against the planned groups for each synthesis (item #5)).                                                                                 | 5-6                             |
|                               | 13b    | Describe any methods required to prepare the data for presentation or synthesis, such as handling of missing summary statistics, or data conversions.                                                                                                                                                | /                               |
|                               | 13c    | Describe any methods used to tabulate or visually display results of individual studies and syntheses.                                                                                                                                                                                               | /                               |
|                               | 13d    | Describe any methods used to synthesize results and provide a rationale for the choice(s). If meta-analysis was performed, describe the model(s), method(s) to identify the presence and extent of statistical heterogeneity, and software package(s) used.                                          | /                               |
|                               | 13e    | Describe any methods used to explore possible causes of heterogeneity among study results (e.g. subgroup analysis, meta-regression).                                                                                                                                                                 | /                               |
|                               | 13f    | Describe any sensitivity analyses conducted to assess robustness of the synthesized results.                                                                                                                                                                                                         | /                               |
| Reporting bias assessment     | 14     | Describe any methods used to assess risk of bias due to missing results in a synthesis (arising from reporting biases).                                                                                                                                                                              | /                               |
| Certainty assessment          | 15     | Describe any methods used to assess certainty (or confidence) in the body of evidence for an outcome.                                                                                                                                                                                                | /                               |

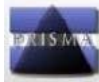

## PRISMA 2020 Checklist

1  
2  
3  
4  
5  
6  
7  
8  
9  
10  
11  
12  
13  
14  
15  
16  
17  
18  
19  
20  
21  
22  
23  
24  
25  
26  
27  
28  
29  
30  
31  
32  
33  
34  
35  
36  
37  
38  
39  
40  
41  
42  
43  
44  
45  
46  
47

| Section and Topic                              | Item # | Checklist item                                                                                                                                                                                                                                                                       | Location where item is reported |
|------------------------------------------------|--------|--------------------------------------------------------------------------------------------------------------------------------------------------------------------------------------------------------------------------------------------------------------------------------------|---------------------------------|
| <b>RESULTS</b>                                 |        |                                                                                                                                                                                                                                                                                      |                                 |
| Study selection                                | 16a    | Describe the results of the search and selection process, from the number of records identified in the search to the number of studies included in the review, ideally using a flow diagram.                                                                                         | 6-7                             |
|                                                | 16b    | Cite studies that might appear to meet the inclusion criteria, but which were excluded, and explain why they were excluded.                                                                                                                                                          | /                               |
| Study characteristics                          | 17     | Cite each included study and present its characteristics.                                                                                                                                                                                                                            | /                               |
| Risk of bias in studies                        | 18     | Present assessments of risk of bias for each included study.                                                                                                                                                                                                                         | /                               |
| Results of individual studies                  | 19     | For all outcomes, present, for each study: (a) summary statistics for each group (where appropriate) and (b) an effect estimate and its precision (e.g. confidence/credible interval), ideally using structured tables or plots.                                                     | 7                               |
| Results of syntheses                           | 20a    | For each synthesis, briefly summarise the characteristics and risk of bias among contributing studies.                                                                                                                                                                               | /                               |
|                                                | 20b    | Present results of all statistical syntheses conducted. If meta-analysis was done, present for each the summary estimate and its precision (e.g. confidence/credible interval) and measures of statistical heterogeneity. If comparing groups, describe the direction of the effect. | 7-8                             |
|                                                | 20c    | Present results of all investigations of possible causes of heterogeneity among study results.                                                                                                                                                                                       | /                               |
|                                                | 20d    | Present results of all sensitivity analyses conducted to assess the robustness of the synthesized results.                                                                                                                                                                           | /                               |
| Reporting biases                               | 21     | Present assessments of risk of bias due to missing results (arising from reporting biases) for each synthesis assessed.                                                                                                                                                              | /                               |
| Certainty of evidence                          | 22     | Present assessments of certainty (or confidence) in the body of evidence for each outcome assessed.                                                                                                                                                                                  | /                               |
| <b>DISCUSSION</b>                              |        |                                                                                                                                                                                                                                                                                      |                                 |
| Discussion                                     | 23a    | Provide a general interpretation of the results in the context of other evidence.                                                                                                                                                                                                    | 8-9                             |
|                                                | 23b    | Discuss any limitations of the evidence included in the review.                                                                                                                                                                                                                      | 9                               |
|                                                | 23c    | Discuss any limitations of the review processes used.                                                                                                                                                                                                                                | 9                               |
|                                                | 23d    | Discuss implications of the results for practice, policy, and future research.                                                                                                                                                                                                       | 10                              |
| <b>OTHER INFORMATION</b>                       |        |                                                                                                                                                                                                                                                                                      |                                 |
| Registration and protocol                      | 24a    | Provide registration information for the review, including register name and registration number, or state that the review was not registered.                                                                                                                                       | /                               |
|                                                | 24b    | Indicate where the review protocol can be accessed, or state that a protocol was not prepared.                                                                                                                                                                                       | /                               |
|                                                | 24c    | Describe and explain any amendments to information provided at registration or in the protocol.                                                                                                                                                                                      | /                               |
| Support                                        | 25     | Describe sources of financial or non-financial support for the review, and the role of the funders or sponsors in the review.                                                                                                                                                        | 11                              |
| Competing interests                            | 26     | Declare any competing interests of review authors.                                                                                                                                                                                                                                   | 11                              |
| Availability of data, code and other materials | 27     | Report which of the following are publicly available and where they can be found: template data collection forms; data extracted from included studies; data used for all analyses; analytic code; any other materials used in the review.                                           | 11                              |

From: Page MJ, McKenzie JE, Bossuyt PM, Boutron I, Hoffmann TC, Mulrow CD, et al. The PRISMA 2020 statement: an updated guideline for reporting systematic reviews. *BMJ* 2021;372:n71. doi: 10.1136/bmj.n71

For more information, visit: <http://www.prisma-statement.org/>  
For peer review only - <http://bmjopen.bmj.com/site/about/guidelines.xhtml>

# BMJ Open

## Influence of surgical margin width on survival rate after resection of intrahepatic cholangiocarcinoma: a systematic review and meta-analysis

|                                 |                                                                                                                                                                                                                                                                                      |
|---------------------------------|--------------------------------------------------------------------------------------------------------------------------------------------------------------------------------------------------------------------------------------------------------------------------------------|
| Journal:                        | <i>BMJ Open</i>                                                                                                                                                                                                                                                                      |
| Manuscript ID                   | bmjopen-2022-067222.R1                                                                                                                                                                                                                                                               |
| Article Type:                   | Original research                                                                                                                                                                                                                                                                    |
| Date Submitted by the Author:   | 29-Nov-2022                                                                                                                                                                                                                                                                          |
| Complete List of Authors:       | Jiang, Jing-Hua; Zhejiang University School of Medicine, Department of Hepatobiliary<br>Fang, Da-Zhang; Zhejiang University School of Medicine, Department of Hepatobiliary<br>Hu, Yi-Ting; Shulan International Medical College, Department of Hepatobiliary and Pancreatic Surgery |
| <b>Primary Subject Heading</b>: | Gastroenterology and hepatology                                                                                                                                                                                                                                                      |
| Secondary Subject Heading:      | Gastroenterology and hepatology                                                                                                                                                                                                                                                      |
| Keywords:                       | Hepatobiliary disease < GASTROENTEROLOGY, Hepatology < INTERNAL MEDICINE, Hepatobiliary tumours < ONCOLOGY                                                                                                                                                                           |
|                                 |                                                                                                                                                                                                                                                                                      |

SCHOLARONE™  
Manuscripts



I, the Submitting Author has the right to grant and does grant on behalf of all authors of the Work (as defined in the below author licence), an exclusive licence and/or a non-exclusive licence for contributions from authors who are: i) UK Crown employees; ii) where BMJ has agreed a CC-BY licence shall apply, and/or iii) in accordance with the terms applicable for US Federal Government officers or employees acting as part of their official duties; on a worldwide, perpetual, irrevocable, royalty-free basis to BMJ Publishing Group Ltd ("BMJ") its licensees and where the relevant Journal is co-owned by BMJ to the co-owners of the Journal, to publish the Work in this journal and any other BMJ products and to exploit all rights, as set out in our [licence](#).

The Submitting Author accepts and understands that any supply made under these terms is made by BMJ to the Submitting Author unless you are acting as an employee on behalf of your employer or a postgraduate student of an affiliated institution which is paying any applicable article publishing charge ("APC") for Open Access articles. Where the Submitting Author wishes to make the Work available on an Open Access basis (and intends to pay the relevant APC), the terms of reuse of such Open Access shall be governed by a Creative Commons licence – details of these licences and which [Creative Commons](#) licence will apply to this Work are set out in our licence referred to above.

Other than as permitted in any relevant BMJ Author's Self Archiving Policies, I confirm this Work has not been accepted for publication elsewhere, is not being considered for publication elsewhere and does not duplicate material already published. I confirm all authors consent to publication of this Work and authorise the granting of this licence.

1  
2  
3  
4 **Influence of surgical margin width on survival rate after**  
5 **resection of intrahepatic cholangiocarcinoma: a systematic**  
6 **review and meta-analysis**  
7  
8  
9  
10  
11  
12

13 **Authors:**

14 Jing-Hua Jiang <sup>1</sup>, Da-Zhang Fang <sup>1</sup>, Yi-Ting Hu <sup>2\*</sup>.

15  
16 **Affiliation:**

- 17  
18 1. Department of Hepatobiliary and Pancreatic Surgery, Affiliated Jinhua Hospital,  
19 Zhejiang University School of Medicine, Jinhua 321000, China.  
20  
21 2. Department of Hepatobiliary and Pancreatic Surgery, Shulan (Hangzhou) Hospital,  
22 Zhejiang Shuren University, Shulan International Medical College, Hangzhou  
23 310022, China.  
24  
25  
26  
27

28 **\*Corresponding Author Information:** DR. Yi-Ting Hu. Department of Hepatobiliary  
29 and Pancreatic Surgery, Shulan (Hangzhou) Hospital, Zhejiang Shuren University,  
30 Shulan International Medical College, Dongxin Road 848#, Hangzhou 310022, China.  
31  
32 Tel: +86-13515861057, E-mail: yitingh@yeah.net.  
33  
34  
35  
36  
37  
38  
39  
40  
41  
42  
43  
44  
45  
46  
47  
48  
49  
50  
51  
52  
53  
54  
55  
56  
57  
58  
59  
60

## Abstract

**Objectives:** Hepatectomy is the best treatment for patients with intrahepatic cholangiocarcinoma (ICC) at present, but there has been controversy about the width of surgical margins. In this study, we systematically investigated the effects of different surgical margin widths on the prognostic survival of ICC patients undergoing hepatectomy through a meta-analysis.

**Design:** Systematic evaluation and meta-analysis were performed by using Stata software.

**Data sources:** PubMed, Embase, and Web of Science databases were systematically searched from inception to June 2022.

**Eligibility criteria:** Cohort studies published in English were primarily included and patients who underwent negative margin (R0) resection were selected. The effects of surgical margin width on overall survival (OS), disease-free survival (DFS), and recurrence-free survival (RFS) in patients with ICC were assessed.

**Data extraction and synthesis:** Two investigators independently conducted literature screening and data extraction, while risk of bias was assessed using funnel plots. Literature quality was assessed by the Newcastle-Ottawa Scale (NOS). Forest plots of risk ratios (HR) and their 95% confidence intervals (CI) for outcome indicators were plotted. Heterogeneity was assessed and determined quantitatively using  $I^2$ , and the stability of the study results was evaluated using sensitivity analysis.

**Results:** A total of 9 studies were included. With the wide margin group ( $\geq 10$  mm) as the control, pooled HR of OS in the narrow margin group ( $< 10$  mm) was 1.54 (95%CI: 1.34-1.77). HR of OS in three subgroups where the margin was less than 5 mm, or ranges from 5 mm to 9 mm, or less than 10 mm in length were 1.88 (95%CI: 1.45-2.42), 1.33 (95% CI: 1.03-1.72), 1.49 (95%CI: 1.20-1.84), respectively. Pooled HR of DFS in the narrow margin group ( $< 10$  mm) was 1.51 (95%CI: 1.14-2.00). Pooled HR of RFS in the narrow margin group ( $< 10$  mm) was 1.35 (95% CI: 1.19-1.54). HR of RFS in three subgroups where the margin was less than 5 mm, or ranges from 5 mm to 9 mm, or less than 10 mm in length were 1.38 (95%CI: 1.07-1.78), 1.39 (95%CI: 1.11-1.74),

1  
2  
3  
4 1.30 (95%CI: 1.06-1.60), respectively. Neither lymph node lesions (HR: 1.44; 95%CI:  
5 1.22-1.70) nor lymph node invasion (HR: 2.14; 95%CI: 1.39-3.28) were favorable for  
6 postoperative OS in ICC patients. Meanwhile, lymph node metastasis (HR: 1.31,  
7 95%CI: 1.09-1.57) was unfavorable for RFS in ICC patients.

8  
9  
10  
11 **Conclusion:** ICC Patients who underwent curative hepatectomy with a negative margin  
12  $\geq 10$  mm may have a long-term survival advantage, but lymph node dissection also  
13 needed to be considered. In addition, tumor-related pathological features needed to be  
14 explored to see if they affect the surgical outcome of R0 margins.

15  
16  
17  
18  
19 **Keywords:** intrahepatic cholangiocarcinoma; surgical margin width; prognosis  
20 survival rate; meta-analysis  
21  
22

### 23 24 25 **Strengths and limitations of this study**

- 26 1. HRs and their 95% CIs for survival data were available from the literature or can be  
27 combined with effect sizes by intercepting survival from survival graphs.
- 28 2. The Newcastle-Ottawa Scale (NOS) was used to evaluate the quality of the literature.
- 29 3. Publication bias analysis was performed using Egger test and Begg funnel plot.
- 30 4. Sensitivity analysis was used to determine the stability and strength of the combined  
31 results.
- 32 5. Differences based on the type of study (single-center and multicenter studies) and  
33 the limited number of studies may affect the statistical results.

### 34 35 36 37 38 39 40 41 42 **Introduction**

43  
44  
45 Intrahepatic cholangiocarcinoma (ICC) is the second most common primary  
46 malignancy originating in the liver, which makes up 10%-15% of primary liver cancers.  
47 However, without distinct pathogenic factors or clinicopathological features, the  
48 diagnosis of ICC tends to be hard<sup>1, 2</sup>. Most patients have to receive hepatobiliary  
49 resection since the disease has processed to the advanced stage of ICC<sup>3</sup>. Limited  
50 knowledge about its pathological features also adds difficulty to the prognosis of ICC  
51 patients. Even after the radical surgery, the recurrence rate remains high and the 5-year  
52 survival rate ranges from only 30-35%. The past three decades have seen the incidence  
53  
54  
55  
56  
57  
58  
59  
60

1  
2  
3  
4 and mortality rate of ICC keep elevating while with a rather poor prognosis<sup>4</sup>.

5  
6 Up to now, radical hepatectomy remains the best option for potentially curative  
7 treatment of ICC patients, mainly to achieve negative marginal (R0) resection<sup>5, 6</sup>. But  
8 high local recurrence rate after R0 resection may be related to the location and extent  
9 of the primary lesion, lymph node involvement, and surgical margin status, leading to  
10 a poor prognosis<sup>5, 7</sup>. Additionally, surgical margin width is also of prognostic essence  
11 after ICC resection, but the definition of the width remains controversial. A recent  
12 multicenter study reported that patients with a margin width  $\geq 10$  mm have better long-  
13 term prognostic outcomes relative to patients with a surgical margin width  $< 10$  mm<sup>8</sup>;  
14 however, another study stated that wide margin hepatectomy does not produce a  
15 survival benefit in all ICC patients and is more beneficial for patients without lymph  
16 node metastases<sup>9</sup>. Hence, it is necessary to evaluate the margin width in patients with  
17 ICC undergoing R0 resection.  
18  
19  
20  
21  
22  
23  
24  
25  
26  
27  
28

29 Li *et al.*<sup>10</sup> evaluated the relationship between surgical margin status and survival  
30 benefit in ICC by meta-analysis and found that negative surgical margins are more  
31 beneficial for ICC patients' overall survival (OS) and disease-free survival (DFS) after  
32 surgical resection, thus emphasizing the importance of R0 resection. In a recent meta-  
33 analysis of the effect of surgical margin width on OS in ICC patients, it is similar that  
34 ICC patients with R0  $\geq 10$  mm have a longer survival benefit than those with  $< 10$  mm<sup>11</sup>.  
35 But this analysis did not provide statistical analysis of DFS, recurrence-free survival  
36 (RFS), or a more refined stratification of the range of R0 margin width, making the  
37 findings lacking reference value for clinical treatment at the present stage. Therefore,  
38 this study was updated from the above meta-analysis to investigate the effect of margin  
39 width on OS, DFS, and RFS in ICC patients who underwent R0 surgical resection in  
40 recent years, as well as a stratification study of margin width ( $< 5$  mm, 5-9 mm,  $< 10$   
41 mm, and  $\geq 10$  mm), to provide more evidence-based medical evidence for the  
42 determination of surgical margin width in ICC patients.  
43  
44  
45  
46  
47  
48  
49  
50  
51  
52  
53  
54  
55

## 56 **1. Methods**

### 57 **1.1 Study Search Strategy**



1  
2  
3  
4  
5  
6  
7  
8  
9  
10  
11  
12  
13  
14  
15  
16  
17  
18  
19  
20  
21  
22  
23  
24  
25  
26  
27  
28  
29  
30  
31  
32  
33  
34  
35  
36  
37  
38  
39  
40  
41  
42  
43  
44  
45  
46  
47  
48  
49  
50  
51  
52  
53  
54  
55  
56  
57  
58  
59  
60

Systematic research was completed in PubMed, Embase and Web of Science to collect relevant studies available by June 2022. The literature search took the form of a combination of medical subject headings (Mesh) and free words, mainly including (((((Cholangiocarcinomas) OR (Cholangiocellular Carcinoma)) OR (Intrahepatic Cholangiocarcinoma)) OR (Cholangiocarcinomas, Intrahepatic)) AND (Surgical margin width)) OR (Length of surgical margin) (Supplementary file). The reference lists of included studies were manually screened for relevant studies that may meet the inclusion requirements.

### 1.2 Inclusion Criteria

(1) ICC patients (confirmed by pathological examination) received potentially curative hepatectomy; (2) Patients underwent R0 resection (which was defined as the distance between the nontumorous tissue and cancer cells  $>1$  mm)<sup>2</sup> with clear surgical margin edge; (3) Patients were classified according to the width of the resection margin, defined as the shortest distance from the edge of the tumor to the line of resection<sup>12</sup>. Patients with margin widths shorter than 4 mm or ranging from 5-10 mm were included in the narrow margin group ( $<10$  mm), and those with margin widths equal to 10 mm or above were included in the wide margin group ( $\geq 10$  mm); (4) The correlations of surgical margin width with OS, DFS, and RFS were presented in the included studies., i.e., the Hazard Ratio (HR) and 95% confidence interval (CI) could be obtained directly from the literature or could be calculated indirectly.

### 1.3 Exclusion Criteria

(1) Abstract, literature reviews, pathological reports, editorials and expert reviews; (2) Studies published repeatedly; (3) Study results reached not through calculation; (4) Animal studies; (5) Studies group patients with different cutoff points instead of 5 mm and 10 mm; (6) Repeat resection for recurrence; (7) Patients with extrahepatic metastases.

### 1.4 Study Selection

We selected studies by (1) basic information like title, first author, publication year, nation, and the time of research; (2) baseline characteristics like sample size, disease, average age, and sex; (3) key factors that bias hazard ratio evaluation; (4) outcome

1  
2  
3  
4 indicators and measured data.

### 5 6 **1.5 Data Extraction**

7  
8 To minimize bias, we had two investigators select studies and extract data in  
9 duplicate independently and then adopted cross-validation to measure their accuracy.  
10 Disagreement was settled by further discussion or judged by the third investigator.  
11 Subsequently, a data extraction sheet designed for this study was used to abstract the  
12 following information: (1) basic information about included studies like the name of  
13 the first author, publication year, nation, type of article, and research period; (2)  
14 baseline characteristics about included cohort like the number of people receiving R0  
15 resection, sex, age, subgroup threshold, lymph node metastasis, number of people in  
16 the narrow margin group of  $<10$  mm and the wide margin group of  $\geq 10$  mm, the longest  
17 follow-up time, liver parenchymal dissection techniques and instrumentation, tumor  
18 subtypes, and adjuvant chemotherapy and radiotherapy; (3) Primary outcome indicator:  
19 HR and 95% CI for prognostic OS and DFS for patients in each group. Secondary  
20 outcome indicator: HR and 95% CI for RFS and lymph node status. OS was defined as  
21 the interval from the date of surgery to the patient's death or last follow-up. DFS was  
22 defined as the interval from the date of surgery to the date of first recurrence, secondary  
23 malignancy, or death of any disease course. RFS was defined as the interval from the  
24 date of surgery to the date of first tumor recurrence, secondary malignancy, or death  
25 with evidence of recurrence. Tumor morphology was typologically defined based on  
26 preoperative imaging and case reports, and ICC was classified into three categories  
27 based on the macroscopic types proposed by the Japanese Liver Cancer Study Group:  
28 mass-forming (MF) type, periductal infiltrating (PI) type, and intraductal growth (IG)  
29 type<sup>9</sup>. For HR and 95% CI of DFS, RFS and OS, if not directly available from the  
30 literature, data such as survival rate can also be intercepted from survival graphs and  
31 entered into Excel with information such as follow-up time, and finally combined effect  
32 sizes by meta-analysis using RevMan software<sup>13</sup>.  
33  
34  
35  
36  
37  
38  
39  
40  
41  
42  
43  
44  
45  
46  
47  
48  
49  
50  
51  
52  
53  
54  
55

### 56 **1.6 Quality Assessment of Included Studies**

57  
58 Included studies were evaluated by two investigators using the Newcastle-Ottawa  
59 Scale (NOS), an assessment scale covering eight items including the selection of the  
60

study groups; the comparability of the groups; and the ascertainment of either the exposure or outcome of interest for case-control or cohort studies respectively. Any disagreement in assessment was resolved by the third investigator.

### 1.7 Statistical Analysis

We used Stata MP16 software to conduct statistical analysis. Between-study heterogeneity was tested by Chi-squared ( $\chi^2$ ) test ( $\alpha=0.1$ ) and further evaluated using  $I^2$ . When  $I^2 \leq 50\%$ , a fixed effect model of the meta-analysis was employed; when  $I^2 > 50\%$ , a random effect model was used to analyze possible reasons, together with sub-group and descriptive analysis. If heterogeneity arises from poor research quality, sensitivity analysis ensued to evaluate the stability and certainty of meta-analysis. Publication bias analysis used Egger test and Begg funnel plot. If the funnel plot was symmetrical, indicating a lack of publication bias. The inspection level of meta-analysis was set as  $\alpha = 0.05$ .

### Patient and Public Involvement

No patient involved.

## 2. Results

### 2.1 Selected Studies and Quality Assessment

Preliminary research returned 73 relevant studies (34 from Pubmed; 28 from Embase; 11 from Web of Science). After screening the title and abstract of these entries identified in the search, 24 studies were retained. Eventually, 9 studies were included after reading their full-text publications<sup>2-4, 8, 9, 12, 14-16</sup>. Among these included studies published from 2008 to 2021, 3 were conducted in China, 1 in Austria, 1 in Korea, 1 in France, 2 in USA and 1 in Japan. The PRISMA flow chart for included studies was presented in Figure 1. NOS scores of included studies in Table 1 showed that top-rated retrospective cohort studies were of high quality.

**Table 1. Quality assessment of included studies**

| Study | Selection | Comparability | Outcome | Score |
|-------|-----------|---------------|---------|-------|
|-------|-----------|---------------|---------|-------|

|                | A | B | C | D | E  | F | G | H  |    |
|----------------|---|---|---|---|----|---|---|----|----|
| Tamandl2008    | * | * | * | * | *  | * | * | *  | 8  |
| Cho2010        | * | * | * | * | *  | * | * |    | 7  |
| Farges2011     | * | * | * | * | *  | * | * | *  | 8  |
| Spolverato2015 | * | * | * | * | *  | * | * | *  | 8  |
| Ma2016         | * | * | * | * | *  | * | * | *  | 8  |
| Tang2016       | * | * | * | * | *  | * | * | *  | 8  |
| Watanabe2020   | * | * | * | * | ** | * | * | ** | 10 |
| Bartsch2020    | * | * | * | * | *  | * | * |    | 7  |
| Zhu2020        | * | * | * | * | ** | * |   |    | 6  |
| Liu2021        | * | * | * | * | *  | * | * | *  | 8  |

Notes: Each study can have up to one “\*” for each item on “Selection” and “Outcomes”, and up to two “\*” for each item on “Comparability”.

A: Representativeness of the exposed cohort

B: Selection of the non-exposed cohort

C: Ascertainment of exposure

D: Demonstration that outcome of interest was not present at start of study

E: Comparability of cohorts based on the design or analysis

F: Assessment of outcome

G: Was follow-up long enough for outcomes to occur

H: Adequacy of follow-up of cohorts

## 2.2 Characteristics of Included Studies

As presented in Table 2, most involved patients aged around 60. The majority of resections were done with modern technology or dissection devices, such as Cavitron ultrasonic surgical attractor or ultrasonic dissector. The baseline characteristics of narrow (<10 mm) and wide ( $\geq$ 10 mm) margin groups were similar across the 9 included studies. The follow-up length ranges from 1 to 84 months. In four studies, several patients were treated with neoadjuvant or adjuvant treatment. Six studies analyzed the tumor morphology, with a predominance of MF type. Only three reported lymph node

metastasis (23.94%-70.5%). Besides, the number of people in the study by Ma *et al.*<sup>2</sup> could not be clearly extracted for the narrow margin group (<10 mm) and the wide margin group ( $\geq 10$  mm), so the exact number of people in both groups could not be clarified. But some survival data could be extracted from that study, and therefore were also included in our study for survival analysis.

**Table 2. Patients' characteristics of 9 cohorts**

| Year | Nation  | No. of Patient | Age, $M(Q_{25}\sim Q_{75})$ | Sex, male (%) | Follow-Up, Mouth | Resection width |        | Lymph node metastasis, n | Adjuvant radiotherapy/chemotherapy |
|------|---------|----------------|-----------------------------|---------------|------------------|-----------------|--------|--------------------------|------------------------------------|
|      |         |                |                             |               |                  | $\geq 10$ mm    | <10 mm |                          |                                    |
| 2008 | Austria | 53             | 63.2 (33.3-85.8)            | 29 (39)       | 1-64             | 15              | 38     | NR                       | NR                                 |
| 2010 | Korea   | 63             | 61.4 (27-82)                | 41 (65)       | NR               | 23              | 40     | 13                       | NR                                 |
| 2019 | France  | 161            | NR                          | 108 (51)      | NR               | 45              | 116    | 47                       | NC:12<br>AC: 51                    |
| 2015 | USA     | 440            | NR                          | 302 (52)      | NR               | 174             | 266    | NR                       | AC: 212<br>AR: 44                  |
| 2016 | China   | 95             | 61 (25-79)                  | 58 (54)       | 1-60             | NR              | NR     | NR                       | NR                                 |
| 2020 | China   | 109            | NR                          | 66 (52)       | 1-54             | 17              | 92     | NR                       | NC: 1                              |
| 2010 | Japan   | 635            | 64.2 (32.3-84.4)            | 388 (61)      | 1-84             | 237             | 398    | 152                      | NR                                 |
| 2016 | USA     | 131            | NR                          | NR            | 0-24             | 22              | 109    | NR                       | PC: 3                              |
| 2019 | China   | 478            | 58 (49-64)                  | 287 (60)      | NR               | 195             | 283    | NR                       | NR                                 |

## 2.3 Meta-analysis Results

### 2.3.1 OS

9 included studies all related to the influence of surgical margin width on the OS

1  
2  
3  
4 of ICC patients. This meta-analysis synthesized relevant data by categorizing margin  
5 width into  $<10$  mm and  $\geq 10$  mm groups, and the former was further categorized into  
6 three subgroups:  $<5$  mm (1-4 mm, three studies) 5-9 mm ( $\geq 5$  mm, three studies) and  
7  $<10$  mm (five studies). There was no overall heterogeneity in the included studies  
8 ( $I^2=14.6\%$ ,  $P=0.305$ ). The fixed effect model meta-analysis indicated that, compared  
9 with the wide margin group ( $\geq 10$  mm), pooled HR of the narrow margin group ( $<10$   
10 mm) stood at 1.54 (95%CI: 1.34-1.77). No significant heterogeneity was found across  
11 three subgroups,  $<5$  mm ( $I^2=0.0\%$ ,  $P=0.839$ ), 5-9 mm ( $I^2=0.0\%$ ,  $P=0.394$ ), and  $<10$  mm  
12 ( $I^2=31.8\%$ ,  $P=0.209$ ) groups. Compared with the wide margin group, pooled HR of  
13 three subgroups ( $<5$  mm, 5-9 mm and  $<10$  mm groups) were 1.88 (95%CI: 1.45-2.42),  
14 1.33 (95%CI: 1.03-1.72) and 1.49 (95%CI: 1.20-1.84), respectively, as Figure 2 showed.

### 27 2.3.2 DFS

28  
29 Two included studies relating to the influence of margin width on DFS of ICC  
30 patients showed no overall heterogeneity ( $I^2=0.0\%$ ,  $P=0.926$ ). According to the result  
31 of the fixed effect model in Figure 3, with the wide margin group ( $\geq 10$  mm) as the  
32 control, the overall pooled HR of the narrow margin group ( $<10$  mm) was 1.51 (95%CI:  
33 1.14-2.00) (Figure 3).

### 41 2.3.3 RFS

42  
43 With five included studies concerning the influence of margin width on RFS of  
44 ICC patients, we categorized the outcome variable in the same way as we conducted  
45 study on OS. With no heterogeneity across the included studies ( $I^2=0.0\%$ ,  $P=0.443$ ),  
46 the pooled HR was 1.35 (95%CI: 1.19-1.54). The fixed effect model of subgroup  
47 analysis found no heterogeneity across  $<5$  mm ( $I^2=0.0\%$ ,  $P=0.576$ ) and 5-9 mm  
48 ( $I^2=0.0\%$ ,  $P=0.450$ ) groups. Compared with the wide margin group ( $\geq 10$  mm), pooled  
49 HR of  $<5$  mm and 5-9 mm groups were 1.38 (95%CI: 1.07-1.78) and 1.39 (95%CI:  
50 1.11-1.74), respectively. With heterogeneity ( $I^2=57.7\%$ ,  $P=0.094$ ) in the narrow margin  
51 ( $<10$  mm) group, compared with the wide margin ( $\geq 10$  mm) group, the pooled HR of  
52 the narrow margin group was found to be 1.30 (95%CI: 1.06-1.60) in comparison with  
53  
54  
55  
56  
57  
58  
59  
60

1  
2  
3  
4 the wide margin group ( $\geq 10$  mm) (Figure 4).  
5  
6

#### 7 8 **2.3.4 Correlation between lymph node status and prognosis**

9  
10 Subsequently, a subgroup analysis was done on the prognostic impact related to lymph  
11 node status. When there was moderate heterogeneity in the effect of lymph node lesions  
12 on OS ( $I^2=57.5\%$ ,  $P=0.051$ ) according to the pooled HR and 95%CI of the multiple  
13 analyses of five positive lymph nodes, a random effects model was used for subsequent  
14 analysis (Figure 5). The results illustrated that lymph node lesions were detrimental to  
15 OS in patients with ICC (HR: 1.44; 95% CI: 1.22-1.70). When there was no significant  
16 heterogeneity in the effect of lymph node invasion on OS ( $I^2=21.2\%$ ,  $P=0.281$ ), a fixed  
17 effects model was utilized (Figure 6). The results reported that patients with ICC in the  
18 presence of lymph node invasion had markedly shorter OS (HR: 2.14; 95% CI: 1.39-  
19 3.28). In addition, the pooled HR of RFS associated with lymph node metastasis was  
20 analyzed, and the results showed notable heterogeneity ( $I^2=85.2\%$ ,  $P=0.009$ ) (Figure  
21 7). The results of the random effects model demonstrated that lymph node metastasis  
22 was detrimental to RFS in patients with ICC (HR: 1.31, 95% CI: 1.09-1.57).  
23  
24  
25  
26  
27  
28  
29  
30  
31  
32  
33  
34  
35  
36

#### 37 **2.4 Sensitivity Analysis**

38  
39 By excluding one study at a time, sensitivity analysis of OS and RFS was  
40 conducted. Results in Figure 8-9 showed no significant difference between the effect  
41 size and the total effect size of OS and RFS, implying that the result reached in this  
42 study was relatively stable. Egger test did not detect substantial publication bias in both  
43 OS ( $P=0.508$ ) and RFS ( $P=0.523$ ), and the Begg funnel plot was symmetrical (Figures  
44 10-11). However, differences based on the type of study (single-center and multicenter  
45 studies) and the limited number of studies may affect the above statistical results.  
46  
47  
48  
49  
50  
51  
52  
53

### 54 **3. Discussion**

#### 55 **3.1 Current Status of Surgery for ICC**

56  
57 The incidence and mortality rates of ICC keep climbing across the world, most  
58  
59  
60

1  
2  
3  
4 patients are not diagnosed until ICC reached an advanced stage<sup>1</sup>.

5  
6 Currently, complete surgical resection with negative histological margins (R0)  
7 remains the only curative treatment modality favoring long-term survival outcomes in  
8 ICC patients, but only a minority of patients have resectable lesions, resulting in poor  
9 postoperative survival<sup>5, 17</sup>. A few studies have shown a better survival benefit for ICC  
10 patients undergoing R0 resection compared to R1 resection<sup>2, 12</sup>. But margin status,  
11 lymph node status, and the presence of vascular invasion all contribute to the poor  
12 prognosis of ICC patients after resection<sup>18-20</sup>. Most patients with ICC usually require  
13 adjuvant therapy<sup>21</sup>. In addition, investigators are concerned that in ICC patients  
14 undergoing R0 resection, the margin width also affects long-term survival after surgery<sup>8,</sup>  
15 <sup>15</sup>. However, there has been controversy regarding the effect of R0 margin width on the  
16 prognostic survival of ICC patients. Thus, this meta-analysis was done to investigate  
17 the effect of margin width on survival outcomes after ICC resection.  
18  
19  
20  
21  
22  
23  
24  
25  
26  
27  
28  
29  
30

### 31 **3.2 The Impact of Margin Width on ICC Patients' Outcomes**

32  
33 In 2016, Tang *et al.*<sup>11</sup> published the first meta-analysis of the effect of margin  
34 width on prognostic survival in ICC patients. This study indicated that patients with  
35 wide margin ( $\geq 10$  mm) have a survival advantage over those with narrow margin ( $< 10$   
36 mm) (HR: 1.59, 95%CI: 1.09-2.32). Based on these investigations, we updated the  
37 study related to the effect of surgical margin width on the prognosis survival of ICC  
38 patients. Two irrelevant studies with a limited sample size in the 2016 meta-analysis  
39 were excluded and five eligible retrospective cohort studies published after 2016 were  
40 included. Besides, this study also filled the void of RFS (4 included studies) and DFS  
41 (2 included studies).  
42  
43  
44  
45  
46  
47  
48  
49

50  
51 9 included studies all focused on the mass-forming (MF) type of ICC (as it  
52 accounts for over 66% of ICC<sup>1</sup>) and categorized the outcome variable into 5 groups:  $< 1$   
53 mm, 1-4 mm, 5-9 mm,  $< 10$  mm and  $\geq 10$  mm. One included study went beyond our  
54 research scope as it further categorized wide margin into  $\geq 15$  mm group, and relevant  
55 data were excluded from the meta-analysis. Pooled HR results indicated that with the  
56 wide margin ( $\geq 10$  mm) group as the control, patients with a margin shorter than 10 mm  
57  
58  
59  
60



1  
2  
3  
4 were prone to poor prognosis (pooled HR of OS: 1.54, 95%CI: 1.34-1.77). It was  
5 demonstrated that ICC tumor cells could metastasize by directly infiltrating the adjacent  
6 liver parenchyma, accompanied by vascular infiltration and perineural infiltration, and  
7 then cause pathological changes in intrahepatic epithelial cells and surrounding  
8 tissues<sup>22</sup>. For most metastasis is limited within 10 mm around the primary lesion, a 10  
9 mm or more resection is expected to cure these ICC patients. Ma *et al.*<sup>2</sup> suggested that  
10 margin width significantly impacts the OS of ICC-MF patients after resection. With a  
11 margin width greater than 9 mm, OS increased from 35.7 months to 184.6 months. With  
12 a margin width of or greater than 10 mm, DFS increased from 14.1 months to 86 months.  
13 In a single-center study, patients with a margin width  $\geq 10$  mm have longer OS (HR:  
14 0.403, 95%CI: 0.191-0.854,  $P=0.018$ ) and RFS (HR: 0.470, 95%CI: 0.242-0.914,  
15  $P=0.026$ )<sup>16</sup>. Similarly, in the present study, analysis of the OS subgroup presented that  
16 the prognostic risk was substantially lower in patients in the 5-9 mm group (HR: 1.33,  
17 95% CI: 1.03-1.72) than in the group with margin width  $< 5$  mm (HR: 1.88, 95% CI:  
18 1.45-2.42). But the difference was not noticeable in the RFS subgroup analysis.  
19 Therefore, margin width  $\geq 10$  mm could be the optimal margin width for prognosis.

### 3.3 Correlation between Lymph Node Status and Prognosis

36  
37 A subgroup analysis of lymph node status was done. Several studies have reported  
38 that lymph node status, in addition to the margin width, is a pivotal prognostic risk  
39 factor affecting ICC patients after surgery<sup>14, 23</sup>. Lymph node lesions, invasion, and  
40 metastasis were factors for poor prognosis after undergoing R0 resection. In a national  
41 survey by the Japanese Liver Cancer Study Group, surgical margin width has a small  
42 impact on the postoperative prognosis of ICC patients, but in patients without lymph  
43 node metastasis, wider surgical margins favored postoperative survival outcomes<sup>9</sup>.  
44 Additionally, by comparing the basic information of patients in the wide and narrow-  
45 margin groups in this study, it was found that the wide-margin group had a higher  
46 proportion of patients with single tumors and smaller tumor diameters; in contrast,  
47 patients in the narrow-margin group had larger tumor diameters and invasion and a  
48 higher proportion of vascular invasion and advanced tumors, which may directly  
49 confound the comparison of prognostic survival times between the two groups. Liu  
50  
51  
52  
53  
54  
55  
56  
57  
58  
59  
60

1  
2  
3  
4 (2021) *et al.*<sup>8</sup> conducted a statistical analysis of the clinical data of 478 ICC patients  
5 from 13 hepatobiliary and pancreatic centers and used the propensity score matching  
6 (PSM) method for pairwise inclusion at 1:1, matched other factors that may affect  
7 prognostic survival such as age, tumor type, and lymph node metastasis-without  
8 statistical differences, retaining only the difference in margin width (wide versus  
9 narrow margins with a 10-mm threshold) for comparison. The results showed that  
10 patients with wide margins had substantially improved OS and DFS compared to  
11 patients with narrow margin. But in an unpaired subgroup analysis, wide margins only  
12 improved the American Joint Committee on Cancer (AJCC) clinical stage I patients,  
13 and patients with lymphatic metastases did not benefit from wide margins. Therefore,  
14 we believed that setting the margin width at  $\geq 10$  mm may require reference to the  
15 patient's tumor type and lymphatic involvement, and 10 mm or larger margins can be  
16 achieved as much as possible in ICC patients without lymph node metastasis and single  
17 MF type to improve the patient's prognosis for long-term survival benefit.

18  
19  
20  
21  
22  
23  
24  
25  
26  
27  
28  
29  
30  
31 Adjuvant treatments such as chemotherapy, arterial chemoembolization, and  
32 chemoradiotherapy may be beneficial for the survival of postoperative ICC patients  
33 with margins as well as positive lymph nodes<sup>21</sup>. Recent meta-analysis results have  
34 suggested that lymph node dissection may not have a marked prognostic impact on  
35 patients with resectable ICC, but it is associated with postoperative recurrence<sup>24, 25</sup>.  
36 Hence, we speculated that adjuvant therapy for ICC patients may also influence the  
37 choice of margin width, but in our study, a subgroup analysis of adjuvant therapy was  
38 not conducted, as an ongoing study object.

### 3.4 Sensitivity Analysis

39  
40  
41  
42  
43  
44  
45  
46  
47  
48 Although the results of the sensitivity analysis did not show substantial differences  
49 between studies, the Spolverato (2015) 5-9 mm group in the OS sensitivity analysis<sup>12</sup>  
50 and the Tamandl (2008)  $< 10$  mm group in the RFS sensitivity analysis were slight  
51 prominence<sup>3</sup>. The study by Spolverato (2015) *et al.* reported that the 1-year OS rate of  
52 100 patients who completed the 5-9 mm R0 margin (83.9%) was higher than the OS of  
53 147 patients who completed the  $\geq 10$  mm R0 group (79.8%), which may be a factor  
54 influencing the OS comparison.

### 3.5 Limitations

This study has some limitations. First, all the studies included in this study were published in English, and the exclusion of non-English literature may lead to selection bias. Second, the presence of single-center and multicenter studies in this study may have contributed to some bias in the results. Third, factors such as type of liver resection, surgical instrumentation, and adjuvant treatment were not analyzed in subgroups, and the prognosis of ICC patients by the above factors was inconclusive and warranted further study. Fourth, the size, number, and location of preoperative tumors and their staging also varied, and evaluation of the impact of surgical margins on postoperative survival of ICC patients in terms of tumor pathological characteristics may be required. Finally, since survival data were mostly obtained indirectly through calculations, the conclusions may differ somewhat from clinical trials.

### 3.6 Conclusion

In conclusion, the meta-analysis revealed that patients undergoing curative hepatectomy for ICC had a survival advantage for a wide margin of  $\geq 10$  mm compared with a narrow margin of  $< 10$  mm under certain conditions. But surgeons should determine the margin width in relation to the patient's condition and should not consider  $< 10$  mm as a contraindication to surgery; in addition, lymph node status should be considered during clinical procedures, as it is also an important factor affecting the patient's postoperative survival outcome. In summary, surgical margins of  $\geq 10$  mm should be achieved as much as possible for ICC patients with negative lymph nodes, but further multicenter study results are still warranted to support this view.

## **Declarations**

### **Patient and Public Involvement**

No patient involved.

### **Ethics approval and consent to participate**

Not applicable.

### **Consent for publication**

All authors consent to submit the manuscript for publication.

### **Data availability statement**

No additional data available.

### **Competing interest**

The authors declare no conflicts of interest.

### **Funding**

Not applicable.

### **Authors' contributions**

JHJ drafting and revising the article, DZF data analysis, YTH gave final approval of the version to be published, and all authors agreed to be accountable for all aspects of the work.

### **Acknowledgments**

Not applicable.

## Reference

1. Cho, S. Y.; Park, S.-J.; Kim, S. H.; Han, S.-S.; Kim, Y.-K.; Lee, K.-W.; Lee, S.-A.; Hong, E. K.; Lee, W. J.; Woo, S. M., Survival Analysis of Intrahepatic Cholangiocarcinoma After Resection. *Annals of Surgical Oncology* **2010**, *17* (7), 1823-1830.
2. Ma, K. W.; Cheung, T. T.; She, W. H.; Chok, K. S. H.; Chan, A. C. Y.; Ng, I. O. L.; Chan, S. C.; Lo, C. M., The effect of wide resection margin in patients with intrahepatic cholangiocarcinoma: A single-center experience. *Medicine (Baltimore)* **2016**, *95* (28), e4133.
3. Tamandl, D.; Herberger, B.; Gruenberger, B.; Puhalla, H.; Klinger, M.; Gruenberger, T., Influence of hepatic resection margin on recurrence and survival in intrahepatic cholangiocarcinoma. *Ann Surg Oncol* **2008**, *15* (10), 2787-94.
4. Farges, O.; Fuks, D.; Boleslawski, E.; Le Treut, Y. P.; Castaing, D.; Laurent, A.; Ducerf, C.; Rivoire, M.; Bachellier, P.; Chiche, L.; Nuzzo, G.; Regimbeau, J. M., Influence of surgical margins on outcome in patients with intrahepatic cholangiocarcinoma: a multicenter study by the AFC-IHCC-2009 study group. *Ann Surg* **2011**, *254* (5), 824-29; discussion 830.
5. Zhang, H.; Yang, T.; Wu, M.; Shen, F., Intrahepatic cholangiocarcinoma: Epidemiology, risk factors, diagnosis and surgical management. *Cancer Lett* **2016**, *379* (2), 198-205.
6. Rahnamai-Azar, A. A.; Weisbrod, A. B.; Dillhoff, M.; Schmidt, C.; Pawlik, T. M., Intrahepatic cholangiocarcinoma: current management and emerging therapies. *Expert Rev Gastroenterol Hepatol* **2017**, *11* (5), 439-449.
7. Zhu, A. X.; Knox, J. J., Adjuvant therapy for intrahepatic cholangiocarcinoma: the debate continues. *Oncologist* **2012**, *17* (12), 1504-7.
8. Liu, H.; Lin, L.; Lin, Z.; Chen, Y.; Huang, Q.; Ding, L.; Lou, J.; Zheng, S.; Bi, X.; Wang, J.; Guo, W.; Li, F.; Wang, J.; Zheng, Y.; Li, J.; Cheng, S.; Zhou, W.; Cheng, Z.; Zeng, Y., Impact of surgical margin width on long-term outcomes for intrahepatic cholangiocarcinoma: a multicenter study. *BMC Cancer* **2021**, *21* (1), 840.
9. Watanabe, Y.; Matsuyama, Y.; Izumi, N.; Kubo, S.; Kokudo, N.; Sakamoto, M.; Shiina, S.; Takayama, T.; Nakashima, O.; Kudo, M., Effect of surgical margin width after R0 resection for intrahepatic cholangiocarcinoma: A nationwide survey of the Liver Cancer Study Group of Japan. *Surgery* **2020**, *167* (5), 793-802.
10. Li, M. X.; Bi, X. Y.; Li, Z. Y.; Huang, Z.; Han, Y.; Zhao, J. J.; Zhao, H.; Cai, J. Q., Impaction of surgical margin status on the survival outcome after surgical resection of intrahepatic cholangiocarcinoma: a systematic review and meta-analysis. *J Surg Res* **2016**, *203* (1), 163-73.
11. Tang, H.; Lu, W.; Li, B.; Meng, X.; Dong, J., Influence of surgical margins on overall survival after resection of intrahepatic cholangiocarcinoma: A meta-analysis. *Medicine* **2016**, *95* (35), e4621.
12. Spolverato, G.; Yakoob, M. Y.; Kim, Y.; Alexandrescu, S.; Marques, H. P.; Lamelas, J.; Aldrighetti, L.; Gamblin, T. C.; Maithel, S. K.; Pulitano, C.; Bauer, T. W.; Shen, F.; Poultsides, G. A.; Marsh, J. W.; Pawlik, T. M., The Impact of Surgical Margin Status on Long-Term Outcome After Resection for Intrahepatic Cholangiocarcinoma. *Ann Surg Oncol* **2015**, *22* (12), 4020-8.
13. Tierney, J. F.; Stewart, L. A.; Ghersi, D.; Burdett, S.; Sydes, M. R., Practical methods for incorporating summary time-to-event data into meta-analysis. *Trials* **2007**, *8*, 16.
14. Cho, S. Y.; Park, S. J.; Kim, S. H.; Han, S. S.; Kim, Y. K.; Lee, K. W.; Lee, S. A.; Hong, E. K.; Lee, W. J.; Woo, S. M., Survival analysis of intrahepatic cholangiocarcinoma after resection. *Ann Surg Oncol* **2010**, *17* (7), 1823-30.

15. Bartsch, F.; Baumgart, J.; Hoppe-Lotichius, M.; Straub, B. K.; Heinrich, S.; Lang, H., Intrahepatic cholangiocarcinoma - influence of resection margin and tumor distance to the liver capsule on survival. *BMC surgery* **2020**, *20* (1), 61.
16. Zhu, H.; Wang, L.; Wang, M.; He, X.; Xu, W.; Zhu, W.; Zhao, Y.; Wang, L., Prognostic value of resection margin length after surgical resection for intrahepatic cholangiocarcinoma. *American journal of surgery* **2021**, *222* (2), 383-389.
17. Hewitt, D. B.; Brown, Z. J.; Pawlik, T. M., Surgical management of intrahepatic cholangiocarcinoma. *Expert Rev Anticancer Ther* **2022**, *22* (1), 27-38.
18. Luo, X.; Yuan, L.; Wang, Y.; Ge, R.; Sun, Y.; Wei, G., Survival outcomes and prognostic factors of surgical therapy for all potentially resectable intrahepatic cholangiocarcinoma: a large single-center cohort study. *J Gastrointest Surg* **2014**, *18* (3), 562-72.
19. Hammad, A. Y.; Berger, N. G.; Eastwood, D.; Tsai, S.; Turaga, K. K.; Christian, K. K.; Johnston, F. M.; Pawlik, T. M.; Gamblin, T. C., Is Radiotherapy Warranted Following Intrahepatic Cholangiocarcinoma Resection? The Impact of Surgical Margins and Lymph Node Status on Survival. *Ann Surg Oncol* **2016**, *23* (Suppl 5), 912-920.
20. Wirasorn, K.; Ngamprasertchai, T.; Chindapasirt, J.; Sookprasert, A.; Khantikaew, N.; Pakkhem, A.; Ungareevittaya, P., Prognostic factors in resectable cholangiocarcinoma patients: Carcinoembryonic antigen, lymph node, surgical margin and chemotherapy. *World J Gastrointest Oncol* **2013**, *5* (4), 81-7.
21. Ke, Q.; Lin, N.; Deng, M.; Wang, L.; Zeng, Y.; Liu, J., The effect of adjuvant therapy for patients with intrahepatic cholangiocarcinoma after surgical resection: A systematic review and meta-analysis. *PLoS One* **2020**, *15* (2), e0229292.
22. El-Diwany, R.; Pawlik, T. M.; Ejaz, A., Intrahepatic Cholangiocarcinoma. *Surgical oncology clinics of North America* **2019**, *28* (4), 587-599.
23. Ali, S. M.; Clark, C. J.; Mounajjed, T.; Wu, T. T.; Harmsen, W. S.; Reid-Lombardo, K. M.; Truty, M. J.; Kendrick, M. L.; Farnell, M. B.; Nagorney, D. M.; Que, F. G., Model to predict survival after surgical resection of intrahepatic cholangiocarcinoma: the Mayo Clinic experience. *HPB (Oxford)* **2015**, *17* (3), 244-50.
24. Li, F.; Jiang, Y.; Jiang, L.; Li, Q.; Yan, X.; Huang, S.; Chen, J.; Yuan, S.; Fu, Y.; Liu, J., Effect of lymph node resection on prognosis of resectable intrahepatic cholangiocarcinoma: A systematic review and meta-analysis. *Front Oncol* **2022**, *12*, 957792.
25. Zhou, R.; Lu, D.; Li, W.; Tan, W.; Zhu, S.; Chen, X.; Min, J.; Shang, C.; Chen, Y., Is lymph node dissection necessary for resectable intrahepatic cholangiocarcinoma? A systematic review and meta-analysis. *HPB (Oxford)* **2019**, *21* (7), 784-792.

## Figure legends

**Figure 1 PRISMA flow chart for the included studies**

**Figure 2 Results of HR pooled analysis of the OS rate of the included studies (with the wide margin group  $\geq 10$  mm as the control)**

**Figure 3 Results of HR pooled analysis of DFS in the included studies (with wide margin group  $\geq 10$  mm as the control)**

1  
2  
3  
4 **Figure 4 Results of HR pooled analysis of RFS in the included studies (with wide margin group**  
5 **≥10 mm as the control)**

6  
7 **Figure 5 Results of HR pooled analysis of lymph node lesions on OS in patients with ICC (with**  
8 **wide margin group ≥10 mm as the control).**

9  
10  
11 **Figure 6 Results of HR pooled analysis of lymph node invasion on OS in ICC patients (with**  
12 **wide margin group ≥10 mm as the control).**

13  
14  
15 **Figure 7 Results of HR pooled analysis of lymph node metastasis on RFS in ICC patients (with**  
16 **wide margin group ≥10 mm as the control).**

17  
18  
19 **Figure 8 Sensitivity analysis of OS after leave-out-one analyses**

20  
21 **Figure 9 Sensitivity analysis of RFS after leave-out-one analyses**

22  
23 **Figure 10 Funnel plot of the relationship between surgical margin width and OS in ICC**  
24 **patients**

25  
26  
27 **Figure 11 Funnel plot of the relationship between surgical margin width and RFS in ICC**  
28 **patients**

1  
2  
3  
4  
5  
6  
7  
8  
9  
10  
11  
12  
13  
14  
15  
16  
17  
18  
19  
20  
21  
22  
23  
24  
25  
26  
27  
28  
29  
30  
31  
32  
33  
34  
35  
36  
37  
38  
39  
40  
41  
42  
43  
44  
45  
46  
47  
48  
49  
50  
51  
52  
53  
54  
55  
56  
57  
58  
59  
60

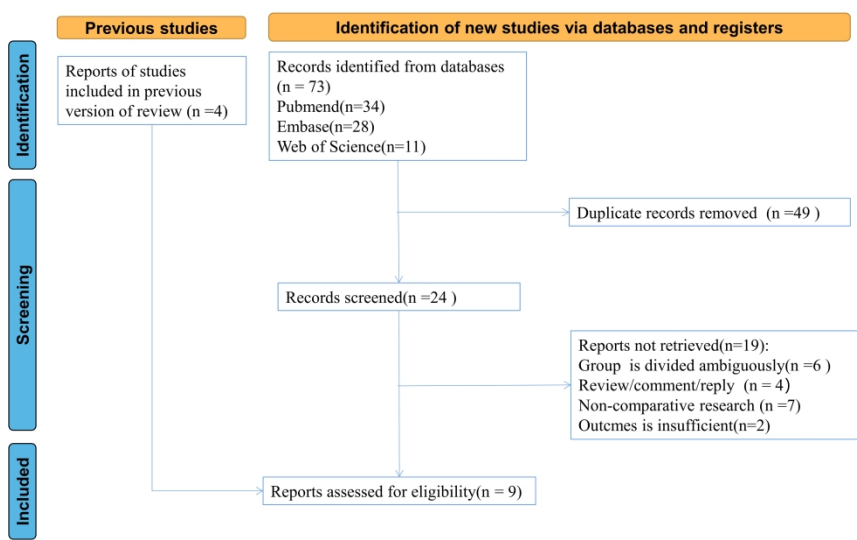

338x190mm (300 x 300 DPI)



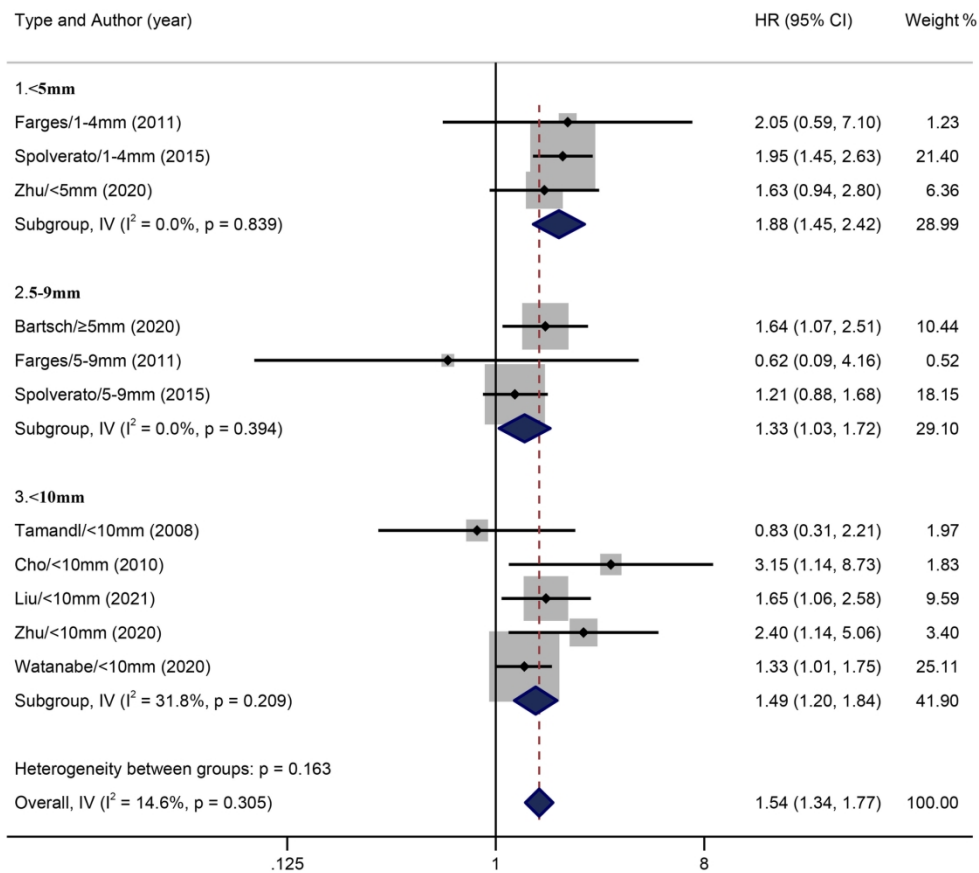

180x160mm (300 x 300 DPI)

1  
2  
3  
4  
5  
6  
7  
8  
9  
10  
11  
12  
13  
14  
15  
16  
17  
18  
19  
20  
21  
22  
23  
24  
25  
26  
27  
28  
29  
30  
31  
32  
33  
34  
35  
36  
37  
38  
39  
40  
41  
42  
43  
44  
45  
46  
47  
48  
49  
50  
51  
52  
53  
54  
55  
56  
57  
58  
59  
60

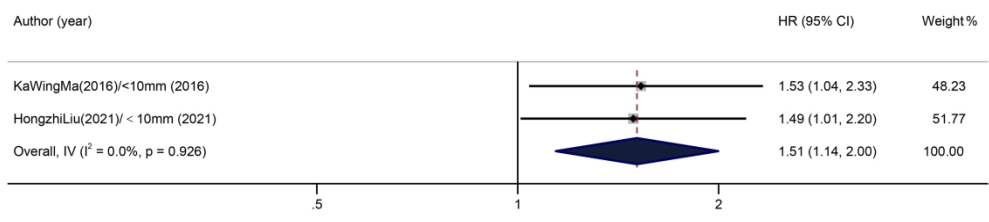

314x68mm (300 x 300 DPI)

1  
2  
3  
4  
5  
6  
7  
8  
9  
10  
11  
12  
13  
14  
15  
16  
17  
18  
19  
20  
21  
22  
23  
24  
25  
26  
27  
28  
29  
30  
31  
32  
33  
34  
35  
36  
37  
38  
39  
40  
41  
42  
43  
44  
45  
46  
47  
48  
49  
50  
51  
52  
53  
54  
55  
56  
57  
58  
59  
60

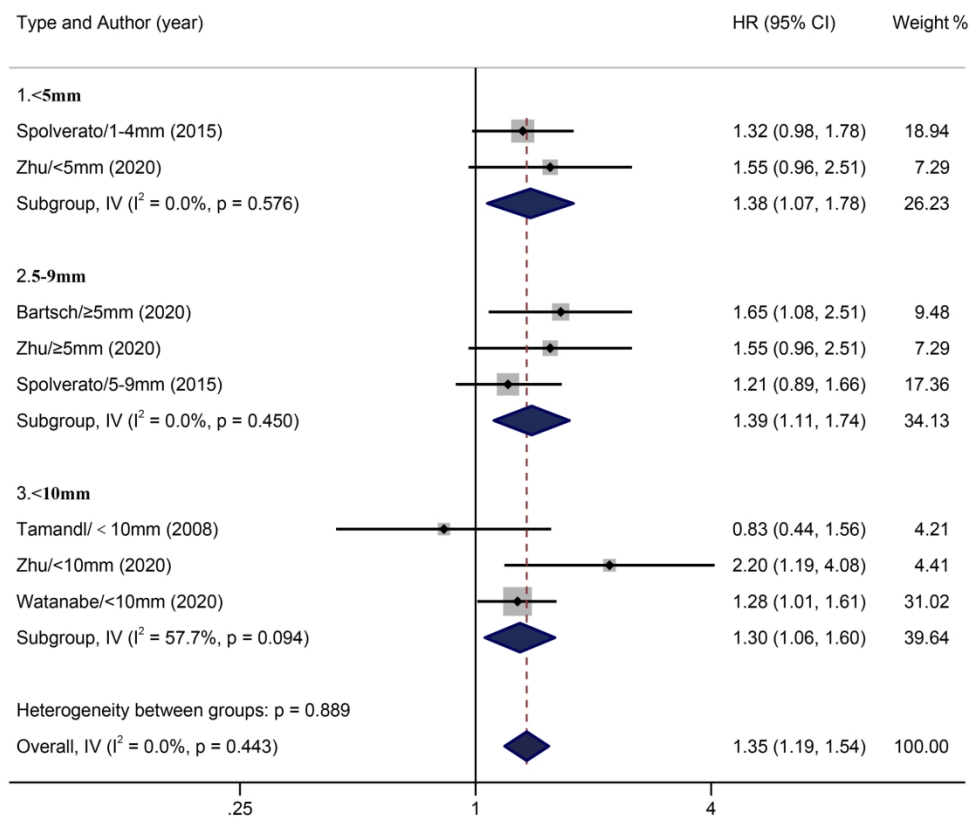

196x165mm (300 x 300 DPI)

1  
2  
3  
4  
5  
6  
7  
8  
9  
10  
11  
12  
13  
14  
15  
16  
17  
18  
19  
20  
21  
22  
23  
24  
25  
26  
27  
28  
29  
30  
31  
32  
33  
34  
35  
36  
37  
38  
39  
40  
41  
42  
43  
44  
45  
46  
47  
48  
49  
50  
51  
52  
53  
54  
55  
56  
57  
58  
59  
60

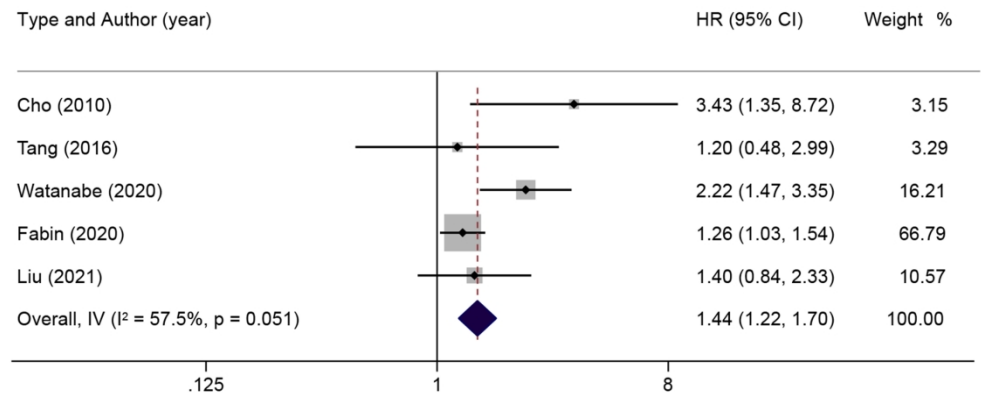

210x87mm (300 x 300 DPI)

1  
2  
3  
4  
5  
6  
7  
8  
9  
10  
11  
12  
13  
14  
15  
16  
17  
18  
19  
20  
21  
22  
23  
24  
25  
26  
27  
28  
29  
30  
31  
32  
33  
34  
35  
36  
37  
38  
39  
40  
41  
42  
43  
44  
45  
46  
47  
48  
49  
50  
51  
52  
53  
54  
55  
56  
57  
58  
59  
60

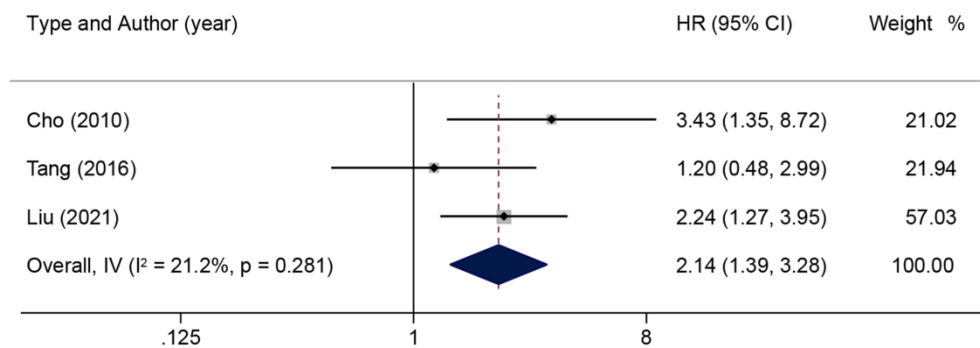

199x77mm (300 x 300 DPI)

1  
2  
3  
4  
5  
6  
7  
8  
9  
10  
11  
12  
13  
14  
15  
16  
17  
18  
19  
20  
21  
22  
23  
24  
25  
26  
27  
28  
29  
30  
31  
32  
33  
34  
35  
36  
37  
38  
39  
40  
41  
42  
43  
44  
45  
46  
47  
48  
49  
50  
51  
52  
53  
54  
55  
56  
57  
58  
59  
60

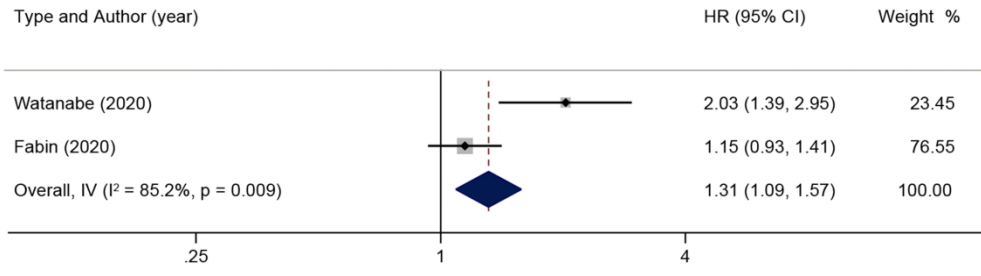

231x66mm (300 x 300 DPI)

1  
2  
3  
4  
5  
6  
7  
8  
9  
10  
11  
12  
13  
14  
15  
16  
17  
18  
19  
20  
21  
22  
23  
24  
25  
26  
27  
28  
29  
30  
31  
32  
33  
34  
35  
36  
37  
38  
39  
40  
41  
42  
43  
44  
45  
46  
47  
48  
49  
50  
51  
52  
53  
54  
55  
56  
57  
58  
59  
60

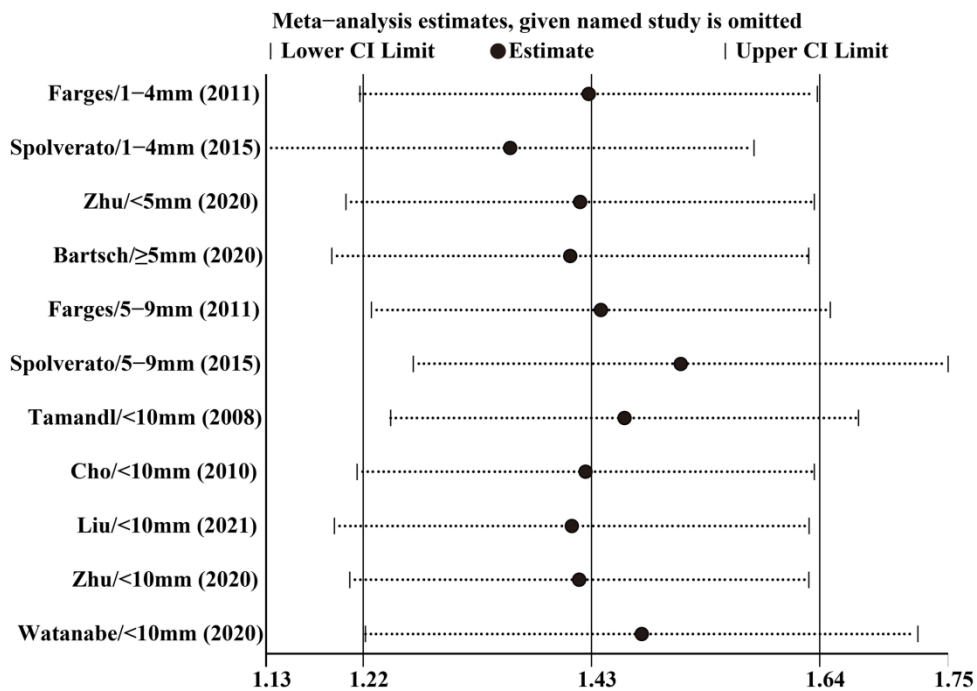

221x156mm (300 x 300 DPI)

1  
2  
3  
4  
5  
6  
7  
8  
9  
10  
11  
12  
13  
14  
15  
16  
17  
18  
19  
20  
21  
22  
23  
24  
25  
26  
27  
28  
29  
30  
31  
32  
33  
34  
35  
36  
37  
38  
39  
40  
41  
42  
43  
44  
45  
46  
47  
48  
49  
50  
51  
52  
53  
54  
55  
56  
57  
58  
59  
60

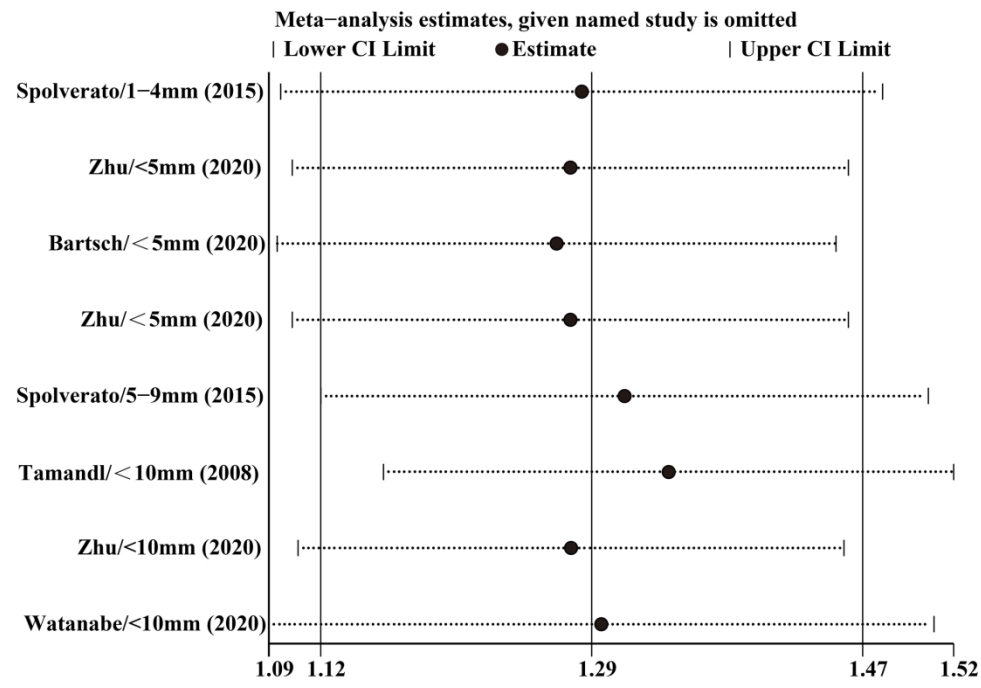

231x164mm (300 x 300 DPI)



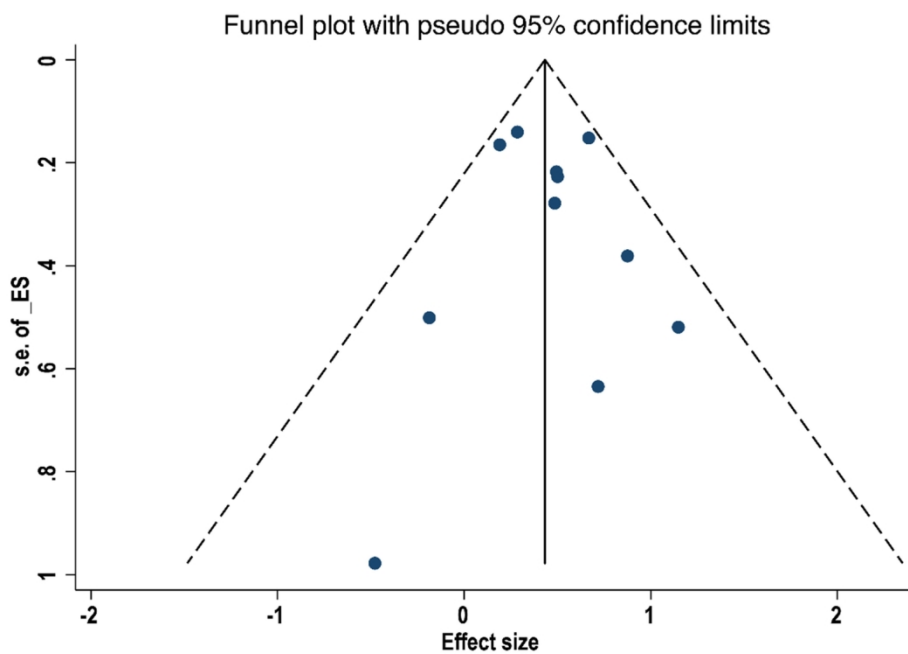

145x103mm (300 x 300 DPI)

1  
2  
3  
4  
5  
6  
7  
8  
9  
10  
11  
12  
13  
14  
15  
16  
17  
18  
19  
20  
21  
22  
23  
24  
25  
26  
27  
28  
29  
30  
31  
32  
33  
34  
35  
36  
37  
38  
39  
40  
41  
42  
43  
44  
45  
46  
47  
48  
49  
50  
51  
52  
53  
54  
55  
56  
57  
58  
59  
60

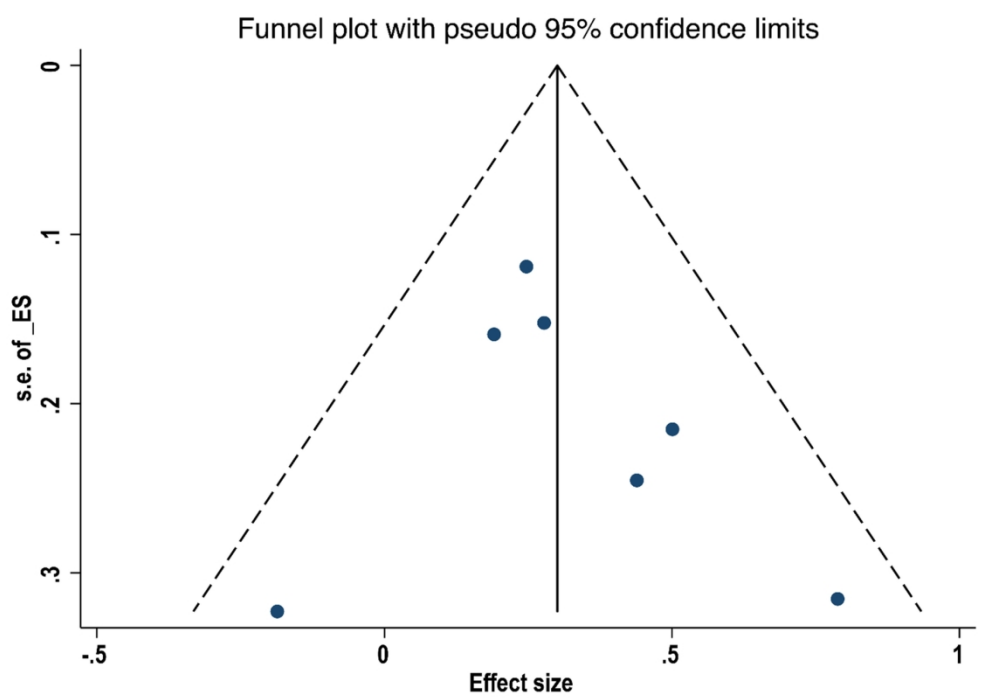

167x119mm (300 x 300 DPI)

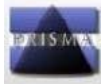

## PRISMA 2020 Checklist

1  
2  
3  
4  
5  
6  
7  
8  
9  
10  
11  
12  
13  
14  
15  
16  
17  
18  
19  
20  
21  
22  
23  
24  
25  
26  
27  
28  
29  
30  
31  
32  
33  
34  
35  
36  
37  
38  
39  
40  
41  
42  
43  
44  
45  
46  
47

| Section and Topic             | Item # | Checklist item                                                                                                                                                                                                                                                                                       | Location where item is reported |
|-------------------------------|--------|------------------------------------------------------------------------------------------------------------------------------------------------------------------------------------------------------------------------------------------------------------------------------------------------------|---------------------------------|
| <b>TITLE</b>                  |        |                                                                                                                                                                                                                                                                                                      |                                 |
| Title                         | 1      | Identify the report as a systematic review.                                                                                                                                                                                                                                                          | 1                               |
| <b>ABSTRACT</b>               |        |                                                                                                                                                                                                                                                                                                      |                                 |
| Abstract                      | 2      | See the PRISMA 2020 for Abstracts checklist.                                                                                                                                                                                                                                                         | 2-3                             |
| <b>INTRODUCTION</b>           |        |                                                                                                                                                                                                                                                                                                      |                                 |
| Rationale                     | 3      | Describe the rationale for the review in the context of existing knowledge.                                                                                                                                                                                                                          | 3-4                             |
| Objectives                    | 4      | Provide an explicit statement of the objective(s) or question(s) the review addresses.                                                                                                                                                                                                               | 4                               |
| <b>METHODS</b>                |        |                                                                                                                                                                                                                                                                                                      |                                 |
| Eligibility criteria          | 5      | Specify the inclusion and exclusion criteria for the review and how studies were grouped for the syntheses.                                                                                                                                                                                          | 5                               |
| Information sources           | 6      | Specify all databases, registers, websites, organisations, reference lists and other sources searched or consulted to identify studies. Specify the date when each source was last searched or consulted.                                                                                            | 5                               |
| Search strategy               | 7      | Present the full search strategies for all databases, registers and websites, including any filters and limits used.                                                                                                                                                                                 | 5                               |
| Selection process             | 8      | Specify the methods used to decide whether a study met the inclusion criteria of the review, including how many reviewers screened each record and each report retrieved, whether they worked independently, and if applicable, details of automation tools used in the process.                     | 5                               |
| Data collection process       | 9      | Specify the methods used to collect data from reports, including how many reviewers collected data from each report, whether they worked independently, any processes for obtaining or confirming data from study investigators, and if applicable, details of automation tools used in the process. | 6                               |
| Data items                    | 10a    | List and define all outcomes for which data were sought. Specify whether all results that were compatible with each outcome domain in each study were sought (e.g. for all measures, time points, analyses), and if not, the methods used to decide which results to collect.                        | 6                               |
|                               | 10b    | List and define all other variables for which data were sought (e.g. participant and intervention characteristics, funding sources). Describe any assumptions made about any missing or unclear information.                                                                                         | 6                               |
| Study risk of bias assessment | 11     | Specify the methods used to assess risk of bias in the included studies, including details of the tool(s) used, how many reviewers assessed each study and whether they worked independently, and if applicable, details of automation tools used in the process.                                    | 6-7                             |
| Effect measures               | 12     | Specify for each outcome the effect measure(s) (e.g. risk ratio, mean difference) used in the synthesis or presentation of results.                                                                                                                                                                  | 6-7                             |
| Synthesis methods             | 13a    | Describe the processes used to decide which studies were eligible for each synthesis (e.g. tabulating the study intervention characteristics and comparing against the planned groups for each synthesis (item #5)).                                                                                 | 7                               |
|                               | 13b    | Describe any methods required to prepare the data for presentation or synthesis, such as handling of missing summary statistics, or data conversions.                                                                                                                                                | 7                               |
|                               | 13c    | Describe any methods used to tabulate or visually display results of individual studies and syntheses.                                                                                                                                                                                               | 7                               |
|                               | 13d    | Describe any methods used to synthesize results and provide a rationale for the choice(s). If meta-analysis was performed, describe the model(s), method(s) to identify the presence and extent of statistical heterogeneity, and software package(s) used.                                          | 7                               |
|                               | 13e    | Describe any methods used to explore possible causes of heterogeneity among study results (e.g. subgroup analysis, meta-regression).                                                                                                                                                                 | 7                               |
|                               | 13f    | Describe any sensitivity analyses conducted to assess robustness of the synthesized results.                                                                                                                                                                                                         | 7                               |
| Reporting bias assessment     | 14     | Describe any methods used to assess risk of bias due to missing results in a synthesis (arising from reporting biases).                                                                                                                                                                              | 7                               |
| Certainty assessment          | 15     | Describe any methods used to assess certainty (or confidence) in the body of evidence for an outcome.                                                                                                                                                                                                | 7                               |

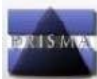

**PRISMA 2020 Checklist**

1  
2  
3  
4  
5  
6  
7  
8  
9  
10  
11  
12  
13  
14  
15  
16  
17  
18  
19  
20  
21  
22  
23  
24  
25  
26  
27  
28  
29  
30  
31  
32  
33  
34  
35  
36  
37  
38  
39  
40  
41  
42  
43  
44  
45  
46  
47

| Section and Topic                              | Item # | Checklist item                                                                                                                                                                                                                                                                       | Location where item is reported |
|------------------------------------------------|--------|--------------------------------------------------------------------------------------------------------------------------------------------------------------------------------------------------------------------------------------------------------------------------------------|---------------------------------|
| <b>RESULTS</b>                                 |        |                                                                                                                                                                                                                                                                                      |                                 |
| Study selection                                | 16a    | Describe the results of the search and selection process, from the number of records identified in the search to the number of studies included in the review, ideally using a flow diagram.                                                                                         | 7-8                             |
|                                                | 16b    | Cite studies that might appear to meet the inclusion criteria, but which were excluded, and explain why they were excluded.                                                                                                                                                          | 7-8                             |
| Study characteristics                          | 17     | Cite each included study and present its characteristics.                                                                                                                                                                                                                            | 8-9                             |
| Risk of bias in studies                        | 18     | Present assessments of risk of bias for each included study.                                                                                                                                                                                                                         | 7-8                             |
| Results of individual studies                  | 19     | For all outcomes, present, for each study: (a) summary statistics for each group (where appropriate) and (b) an effect estimate and its precision (e.g. confidence/credible interval), ideally using structured tables or plots.                                                     | 9-11                            |
| Results of syntheses                           | 20a    | For each synthesis, briefly summarise the characteristics and risk of bias among contributing studies.                                                                                                                                                                               | 9-11                            |
|                                                | 20b    | Present results of all statistical syntheses conducted. If meta-analysis was done, present for each the summary estimate and its precision (e.g. confidence/credible interval) and measures of statistical heterogeneity. If comparing groups, describe the direction of the effect. | 9-11                            |
|                                                | 20c    | Present results of all investigations of possible causes of heterogeneity among study results.                                                                                                                                                                                       | 9-11                            |
|                                                | 20d    | Present results of all sensitivity analyses conducted to assess the robustness of the synthesized results.                                                                                                                                                                           | 11                              |
| Reporting biases                               | 21     | Present assessments of risk of bias due to missing results (arising from reporting biases) for each synthesis assessed.                                                                                                                                                              | 9-11                            |
| Certainty of evidence                          | 22     | Present assessments of certainty (or confidence) in the body of evidence for each outcome assessed.                                                                                                                                                                                  | 9-11                            |
| <b>DISCUSSION</b>                              |        |                                                                                                                                                                                                                                                                                      |                                 |
| Discussion                                     | 23a    | Provide a general interpretation of the results in the context of other evidence.                                                                                                                                                                                                    | 11-12                           |
|                                                | 23b    | Discuss any limitations of the evidence included in the review.                                                                                                                                                                                                                      | 15                              |
|                                                | 23c    | Discuss any limitations of the review processes used.                                                                                                                                                                                                                                | 15                              |
|                                                | 23d    | Discuss implications of the results for practice, policy, and future research.                                                                                                                                                                                                       | 12-14                           |
| <b>OTHER INFORMATION</b>                       |        |                                                                                                                                                                                                                                                                                      |                                 |
| Registration and protocol                      | 24a    | Provide registration information for the review, including register name and registration number, or state that the review was not registered.                                                                                                                                       | 16                              |
|                                                | 24b    | Indicate where the review protocol can be accessed, or state that a protocol was not prepared.                                                                                                                                                                                       | 16                              |
|                                                | 24c    | Describe and explain any amendments to information provided at registration or in the protocol.                                                                                                                                                                                      | 16                              |
| Support                                        | 25     | Describe sources of financial or non-financial support for the review, and the role of the funders or sponsors in the review.                                                                                                                                                        | 16                              |
| Competing interests                            | 26     | Declare any competing interests of review authors.                                                                                                                                                                                                                                   | 16                              |
| Availability of data, code and other materials | 27     | Report which of the following are publicly available and where they can be found: template data collection forms; data extracted from included studies; data used for all analyses; analytic code; any other materials used in the review.                                           | 16                              |

From: Page MJ, McKenzie JE, Bossuyt PM, Boutron I, Hoffmann TC, Mulrow CD, et al. The PRISMA 2020 statement: an updated guideline for reporting systematic reviews. *BMJ* 2021;372:n71. doi: 10.1136/bmj.n71

### Surgical margin width – search strategy

Using the MeSH subject heading function in the National Library of Medicine:

1. The subject heading for searching “intrahepatic cholangiocarcinoma” was “Cholangiocarcinoma”. The free words were “Cholangiocarcinomas”, “Cholangiocellular Carcinoma”, “Intrahepatic Cholangiocarcinoma”, “Cholangiocarcinomas, Intrahepatic”.

2. Search in combination with keywords such as “surgery”, “resection margin width”, and “resection margin length”.

3. Search strategy for Pubmed:

(((((Cholangiocarcinomas) OR (Cholangiocellular Carcinoma)) OR (Intrahepatic Cholangiocarcinoma)) OR (Cholangiocarcinomas, Intrahepatic)) AND (Surgical margin width)) OR (Length of surgical margin)

4. Search strategy for Embase:

Cholangiocarcinomas:ti,ab,kw OR ‘Cholangiocellular Carcinoma’:ti,ab,kw OR ‘Intrahepatic Cholangiocarcinoma’:ti,ab,kw OR ‘Cholangiocarcinomas, Intrahepatic’:ti,ab,kw AND ‘Surgical margin width’

5. Search strategy for Web of Science:

((((TS=(Cholangiocarcinomas)) OR TS=(Cholangiocellular Carcinoma)) OR TS=(Intrahepatic Cholangiocarcinoma)) AND TS=(Surgical margin width))

# BMJ Open

## Influence of surgical margin width on survival rate after resection of intrahepatic cholangiocarcinoma: a systematic review and meta-analysis

|                                 |                                                                                                                                                                                                                                                                                      |
|---------------------------------|--------------------------------------------------------------------------------------------------------------------------------------------------------------------------------------------------------------------------------------------------------------------------------------|
| Journal:                        | <i>BMJ Open</i>                                                                                                                                                                                                                                                                      |
| Manuscript ID                   | bmjopen-2022-067222.R2                                                                                                                                                                                                                                                               |
| Article Type:                   | Original research                                                                                                                                                                                                                                                                    |
| Date Submitted by the Author:   | 17-Mar-2023                                                                                                                                                                                                                                                                          |
| Complete List of Authors:       | Jiang, Jing-Hua; Zhejiang University School of Medicine, Department of Hepatobiliary<br>Fang, Da-Zhang; Zhejiang University School of Medicine, Department of Hepatobiliary<br>Hu, Yi-Ting; Shulan International Medical College, Department of Hepatobiliary and Pancreatic Surgery |
| <b>Primary Subject Heading</b>: | Gastroenterology and hepatology                                                                                                                                                                                                                                                      |
| Secondary Subject Heading:      | Gastroenterology and hepatology                                                                                                                                                                                                                                                      |
| Keywords:                       | Hepatobiliary disease < GASTROENTEROLOGY, Hepatology < INTERNAL MEDICINE, Hepatobiliary tumours < ONCOLOGY                                                                                                                                                                           |
|                                 |                                                                                                                                                                                                                                                                                      |

SCHOLARONE™  
Manuscripts



I, the Submitting Author has the right to grant and does grant on behalf of all authors of the Work (as defined in the below author licence), an exclusive licence and/or a non-exclusive licence for contributions from authors who are: i) UK Crown employees; ii) where BMJ has agreed a CC-BY licence shall apply, and/or iii) in accordance with the terms applicable for US Federal Government officers or employees acting as part of their official duties; on a worldwide, perpetual, irrevocable, royalty-free basis to BMJ Publishing Group Ltd ("BMJ") its licensees and where the relevant Journal is co-owned by BMJ to the co-owners of the Journal, to publish the Work in this journal and any other BMJ products and to exploit all rights, as set out in our [licence](#).

The Submitting Author accepts and understands that any supply made under these terms is made by BMJ to the Submitting Author unless you are acting as an employee on behalf of your employer or a postgraduate student of an affiliated institution which is paying any applicable article publishing charge ("APC") for Open Access articles. Where the Submitting Author wishes to make the Work available on an Open Access basis (and intends to pay the relevant APC), the terms of reuse of such Open Access shall be governed by a Creative Commons licence – details of these licences and which [Creative Commons](#) licence will apply to this Work are set out in our licence referred to above.

Other than as permitted in any relevant BMJ Author's Self Archiving Policies, I confirm this Work has not been accepted for publication elsewhere, is not being considered for publication elsewhere and does not duplicate material already published. I confirm all authors consent to publication of this Work and authorise the granting of this licence.

1  
2  
3  
4 **Influence of surgical margin width on survival rate after**  
5  
6 **resection of intrahepatic cholangiocarcinoma: a systematic**  
7  
8 **review and meta-analysis**  
9  
10  
11

12  
13 **Authors:**

14 Jing-Hua Jiang <sup>1</sup>, Da-Zhang Fang <sup>1</sup>, Yi-Ting Hu <sup>2\*</sup>  
15  
16

17  
18 **Affiliations:**

- 19  
20  
21 1. Department of Hepatobiliary and Pancreatic Surgery, Affiliated Jinhua Hospital,  
22 Zhejiang University School of Medicine, Jinhua 321000, China.  
23  
24 2. Department of Hepatobiliary and Pancreatic Surgery, Shulan (Hangzhou) Hospital,  
25 Zhejiang Shuren University, Shulan International Medical College, Hangzhou  
26 310022, China.  
27  
28  
29

30  
31  
32 **\*Correspondence to:**

33 Dr. Yi-Ting Hu  
34

35  
36 Department of Hepatobiliary and Pancreatic Surgery, Shulan (Hangzhou) Hospital,  
37 Zhejiang Shuren University, Shulan International Medical College, Dongxin Road  
38 848#, Hangzhou 310022, China.  
39

40 E-mail: yitingh@yeah.net  
41  
42  
43  
44  
45  
46  
47  
48  
49  
50  
51  
52  
53  
54  
55  
56  
57  
58  
59  
60



## Abstract

**Objectives:** Hepatectomy is the best treatment for patients with intrahepatic cholangiocarcinoma (ICC) at present, but there has been controversy about the width of surgical margins. In this study, we systematically investigated the effects of different surgical margin widths on the prognosis of ICC patients undergoing hepatectomy.

**Design:** Systematic review and meta-analysis.

**Data sources:** PubMed, Embase, and Web of Science databases were systematically searched from inception to June 2022.

**Eligibility criteria:** Cohort studies reported in English with patients who underwent negative margin (R0) resection were included. The effects of surgical margin width on overall survival (OS), disease-free survival (DFS), and recurrence-free survival (RFS) in patients with ICC were assessed.

**Data extraction and synthesis:** Two investigators independently conducted literature screening and data extraction. Risk of bias was assessed using funnel plots and quality was assessed by the Newcastle-Ottawa Scale (NOS). Forest plots of hazard ratios (HRs) and their 95% confidence intervals (CI) for outcome indicators were plotted. Heterogeneity was assessed and determined quantitatively using  $I^2$ , and the stability of the study results was evaluated using sensitivity analysis. Analyses were performed using Stata software.

**Results:** Nine studies were included. With the wide margin group ( $\geq 10$  mm) as the control, pooled HR of OS in the narrow margin group ( $< 10$  mm) was 1.54 (95% CI 1.34-1.77). HR of OS in three subgroups where the margin was less than 5 mm, ranged from 5 mm to 9 mm, or was less than 10 mm in length were 1.88 (1.45-2.42), 1.33 (1.03-1.72), and 1.49 (1.20-1.84), respectively. Pooled HR of DFS in the narrow margin group ( $< 10$  mm) was 1.51 (1.14-2.00). Pooled HR of RFS in the narrow margin group ( $< 10$  mm) was 1.35 (1.19-1.54). HR of RFS in three subgroups where the margin was less than 5 mm, ranged from 5 mm to 9 mm, or was less than 10 mm in length were 1.38 (1.07-1.78), 1.39 (1.11-1.74), and 1.30 (1.06-1.60), respectively. Neither lymph node lesions (HR 1.44, 95%CI 1.22-1.70) nor lymph node invasion (2.14, 1.39-3.28)

1  
2  
3  
4 were favorable for postoperative OS in ICC patients. Lymph node metastasis (1.31,  
5  
6 1.09-1.57) was unfavorable for RFS in ICC patients.

7  
8 **Conclusion:** ICC Patients who underwent curative hepatectomy with a negative margin  
9  
10  $\geq 10$  mm may have a long-term survival advantage, but lymph node dissection also  
11  
12 needs to be considered. In addition, tumor-related pathological features need to be  
13  
14 explored to see if they affect the surgical outcome of R0 margins.

15  
16  
17 **Keywords:** intrahepatic cholangiocarcinoma; surgical margin width; prognosis  
18  
19 survival rate; meta-analysis  
20  
21

### 22 23 **Strengths and limitations of this study**

24  
25 \* The Newcastle-Ottawa Scale (NOS) was used to evaluate the quality of the included  
26  
27 studies.

28  
29 \* Publication bias analysis was performed using Egger test and Begg funnel plot.

30  
31 \* Sensitivity analysis was used to determine the stability and strength of the combined  
32  
33 results.

34  
35 \* Differences based on the type of study (eg, single-center and multicenter studies) and  
36  
37 the limited number of studies may have impacted the results.  
38  
39

### 40 41 **Introduction**

42  
43 Intrahepatic cholangiocarcinoma (ICC) is the second most common primary  
44  
45 malignancy originating in the liver, which makes up 10%-15% of primary liver cancers.  
46  
47 However, without distinct pathogenic factors or clinicopathological features, the  
48  
49 diagnosis of ICC tends to be hard[1,2]. Most patients have to receive hepatobiliary  
50  
51 resection since the disease has processed to the advanced stage of ICC[3]. Limited  
52  
53 knowledge about its pathological features also adds difficulty to the prognosis of ICC  
54  
55 patients. Even after the radical surgery, the recurrence rate remains high and the 5-year  
56  
57 survival rate ranges from only 30-35%. The past three decades have seen the incidence  
58  
59 and mortality rate of ICC keep elevating with a rather poor prognosis[4].  
60

1  
2  
3  
4 Up to now, radical hepatectomy remains the best option for potentially curative  
5 treatment of ICC patients, mainly to achieve negative marginal (R0) resection[5,6]. But  
6 high local recurrence rate after R0 resection may be related to the location and extent  
7 of the primary lesion, lymph node involvement, and surgical margin status, leading to  
8 a poor prognosis[5,7]. Additionally, surgical margin width is also of prognostic essence  
9 after ICC resection, but the definition of the width remains controversial. A recent  
10 multicenter study reported that patients with a margin width  $\geq 10$  mm have better long-  
11 term prognostic outcomes relative to patients with a surgical margin width  $< 10$  mm[8];  
12 however, another study stated that wide margin hepatectomy does not produce a  
13 survival benefit in all ICC patients and is more beneficial for patients without lymph  
14 node metastases[9]. Hence, it is necessary to evaluate the margin width in patients with  
15 ICC undergoing R0 resection.

16  
17  
18  
19  
20  
21  
22  
23  
24  
25  
26  
27 Li *et al.*[10] evaluated the relationship between surgical margin status and survival  
28 benefit in ICC by meta-analysis and found that negative surgical margins are more  
29 beneficial for ICC patients' overall survival (OS) and disease-free survival (DFS) after  
30 surgical resection, thus emphasizing the importance of R0 resection. In a recent meta-  
31 analysis of the effect of surgical margin width on OS in ICC patients, it is similar that  
32 ICC patients with R0  $\geq 10$  mm have a longer survival benefit than those with  $< 10$   
33 mm[11]. But this analysis did not provide statistical analysis of DFS, recurrence-free  
34 survival (RFS), or a more refined stratification of the range of R0 margin width, making  
35 the findings lacking reference value for clinical treatment at the present stage. Therefore,  
36 this study was updated from the above meta-analysis to investigate the effect of margin  
37 width on OS, DFS, and RFS in ICC patients who underwent R0 surgical resection in  
38 recent years, as well as a stratification study of margin width ( $< 5$  mm, 5-9 mm,  $< 10$   
39 mm, and  $\geq 10$  mm), to provide more evidence-based medical evidence for the  
40 determination of surgical margin width in ICC patients.

## 41 42 43 44 45 46 47 48 49 50 51 52 53 54 **Methods**

### 55 56 57 **Search strategy**

58  
59 Systematic searches were done of PubMed, Embase and Web of Science to collect  
60

1  
2  
3  
4 relevant studies available by June 2022. The literature search took the form of a  
5 combination of medical subject headings (Mesh) and free words, mainly including  
6 (((((Cholangiocarcinomas) OR (Cholangiocellular Carcinoma)) OR (Intrahepatic  
7 Cholangiocarcinoma)) OR (Cholangiocarcinomas, Intrahepatic)) AND (Surgical  
8 margin width)) OR (Length of surgical margin) (Supplementary file). The reference  
9 lists of included studies were manually screened for relevant studies that may meet the  
10 inclusion requirements.  
11  
12  
13  
14  
15  
16

### 17 **Inclusion criteria**

18  
19 (1) ICC patients (confirmed by pathological examination) received potentially curative  
20 hepatectomy; (2) Patients underwent R0 resection (which was defined as the distance  
21 between the nontumorous tissue and cancer cells >1 mm)[2] with clear surgical margin  
22 edge; (3) Patients were classified according to the width of the resection margin,  
23 defined as the shortest distance from the edge of the tumor to the line of resection[12].  
24 Patients with margin widths shorter than 4 mm or ranging from 5-10 mm were included  
25 in the narrow margin group (<10 mm), and those with margin widths equal to 10 mm  
26 or above were included in the wide margin group ( $\geq 10$  mm); (4) The correlations of  
27 surgical margin width with OS, DFS, and RFS were presented in the included studies.,  
28 the hazard ratio (HR) and 95% confidence interval (CI) could be obtained directly from  
29 the literature or could be calculated indirectly.  
30  
31  
32  
33  
34  
35  
36  
37  
38  
39

### 40 **Exclusion criteria**

41  
42 (1) Abstract, literature reviews, pathological reports, editorials and expert reviews; (2)  
43 Studies published repeatedly; (3) Study results reached not through calculation; (4)  
44 Animal studies; (5) Studies group patients with different cutoff points instead of 5 mm  
45 and 10 mm; (6) Repeat resection for recurrence; (7) Patients with extrahepatic  
46 metastases.  
47  
48  
49  
50  
51

### 52 **Study selection**

53  
54 We selected studies by (1) basic information like title, first author, publication year,  
55 nation, and the time of research; (2) baseline characteristics like sample size, disease,  
56 average age, and sex; (3) key factors that bias hazard ratio evaluation; (4) outcome  
57 indicators and measured data.  
58  
59  
60

### Data extraction

To minimize bias, we had two investigators select studies and extract data in duplicate independently and then adopted cross-validation to measure their accuracy. Disagreement was settled by further discussion or judged by the third investigator. Subsequently, a data extraction sheet designed for this study was used to abstract the following information: (1) basic information about included studies like the name of the first author, publication year, nation, type of article, and research period; (2) baseline characteristics about included cohort like the number of people receiving R0 resection, sex, age, subgroup threshold, lymph node metastasis, number of people in the narrow margin group of  $<10$  mm and the wide margin group of  $\geq 10$  mm, the longest follow-up time, liver parenchymal dissection techniques and instrumentation, tumor subtypes, and adjuvant chemotherapy and radiotherapy; (3) Primary outcome indicator: HR and 95% CI for prognostic OS and DFS for patients in each group. Secondary outcome indicator: HR and 95% CI for RFS and lymph node status. OS was defined as the interval from the date of surgery to the patient's death or last follow-up. DFS was defined as the interval from the date of surgery to the date of first recurrence, secondary malignancy, or death of any disease course. RFS was defined as the interval from the date of surgery to the date of first tumor recurrence, secondary malignancy, or death with evidence of recurrence. Tumor morphology was typologically defined based on preoperative imaging and case reports, and ICC was classified into three categories based on the macroscopic types proposed by the Japanese Liver Cancer Study Group: mass-forming (MF) type, periductal infiltrating (PI) type, and intraductal growth (IG) type[9]. For HR and 95% CI of DFS, RFS and OS, if not directly available from the literature, data such as survival rate can also be intercepted from survival graphs and entered into Excel with information such as follow-up time, and finally combined effect sizes by meta-analysis using RevMan software[13].

### Quality assessment of included studies

Included studies were evaluated by two investigators using the Newcastle-Ottawa Scale (NOS), an assessment scale covering eight items including the selection of the study groups; the comparability of the groups; and the ascertainment of either the exposure

or outcome of interest for case-control or cohort studies respectively. Any disagreement in assessment was resolved by the third investigator.

### Statistical analysis

We used Stata MP16 software to conduct statistical analysis. Between-study heterogeneity was tested by Chi-squared ( $\chi^2$ ) test ( $\alpha=0.1$ ) and further evaluated using  $I^2$ . When  $I^2 \leq 50\%$ , a fixed effect model of the meta-analysis was employed; when  $I^2 > 50\%$ , a random effect model was used to analyze possible reasons, together with sub-group and descriptive analysis. If heterogeneity arises from poor research quality, sensitivity analysis ensued to evaluate the stability and certainty of meta-analysis. Publication bias analysis used Egger test and Begg funnel plot. If the funnel plot was symmetrical, indicating a lack of publication bias. The inspection level of meta-analysis was set as  $\alpha = 0.05$ .

### Patient and public involvement

None.

## Results

### Selected studies and quality assessment

Initial searches returned 73 relevant studies (34 from PubMed; 28 from Embase; 11 from Web of Science). After screening the title and abstract of these entries identified in the search, 24 studies were retained. Eventually, 9 studies were included after reading their full-text publications[2-4,8,9,12,14-16]. Among these included studies published from 2008 to 2021, 3 were conducted in China, 1 in Austria, 1 in Korea, 1 in France, 2 in the USA and 1 in Japan. The PRISMA flowchart for included studies was presented in Figure 1. NOS scores of included studies in Table 1 showed that top-rated retrospective cohort studies were of high quality.

**Table 1. Quality assessment of included studies**

| Study       | Selection |   |   |   | Comparability | Outcome |   |   | Score    |
|-------------|-----------|---|---|---|---------------|---------|---|---|----------|
|             | A         | B | C | D | E             | F       | G | H |          |
| Tamandl2008 | *         | * | * | * | *             | *       | * | * | <b>8</b> |

|    |                |   |   |   |   |    |   |   |    |
|----|----------------|---|---|---|---|----|---|---|----|
| 1  |                |   |   |   |   |    |   |   |    |
| 2  |                |   |   |   |   |    |   |   |    |
| 3  |                |   |   |   |   |    |   |   |    |
| 4  | Cho2010        | * | * | * | * | *  | * | * | 7  |
| 5  | Farges2011     | * | * | * | * | *  | * | * | 8  |
| 6  |                |   |   |   |   |    |   |   |    |
| 7  | Spolverato2015 | * | * | * | * | *  | * | * | 8  |
| 8  |                |   |   |   |   |    |   |   |    |
| 9  | Ma2016         | * | * | * | * | *  | * | * | 8  |
| 10 |                |   |   |   |   |    |   |   |    |
| 11 | Tang2016       | * | * | * | * | *  | * | * | 8  |
| 12 |                |   |   |   |   |    |   |   |    |
| 13 | Watanabe2020   | * | * | * | * | ** | * | * | 10 |
| 14 |                |   |   |   |   |    |   |   |    |
| 15 | Bartsch2020    | * | * | * | * | *  | * | * | 7  |
| 16 |                |   |   |   |   |    |   |   |    |
| 17 | Zhu2020        | * | * | * | * | ** | * | * | 6  |
| 18 |                |   |   |   |   |    |   |   |    |
| 19 | Liu2021        | * | * | * | * | *  | * | * | 8  |
| 20 |                |   |   |   |   |    |   |   |    |

Notes: Each study can have up to one “\*” for each item on “Selection” and “Outcomes”, and up to two “\*” for each item on “Comparability”.

A: Representativeness of the exposed cohort

B: Selection of the non-exposed cohort

C: Ascertainment of exposure

D: Demonstration that outcome of interest was not present at the start of the study

E: Comparability of cohorts based on the design or analysis

F: Assessment of outcome

G: Was follow-up long enough for outcomes to occur

H: Adequacy of follow-up of cohorts

### Characteristics of included studies

As presented in Table 2, most involved patients aged around 60. The majority of resections were done with modern technology or dissection devices, such as Cavitron ultrasonic surgical attractor or ultrasonic dissector. The baseline characteristics of narrow (<10 mm) and wide ( $\geq$ 10 mm) margin groups were similar across the 9 included studies. The follow-up length ranges from 1 to 84 months. In four studies, several patients were treated with neoadjuvant or adjuvant treatment. Six studies analyzed the tumor morphology, with a predominance of MF type. Only three reported lymph node metastasis (23.94%-70.5%). Besides, the number of people in the study by Ma *et al.*[2] could not be clearly extracted for the narrow margin group (<10 mm) and the wide

margin group ( $\geq 10$  mm), so the exact number of people in both groups could not be clarified. But some survival data could be extracted from that study, and therefore were also included in our study for survival analysis.

**Table 2. Patients' characteristics by study**

| Year | Nation  | No. of Patient | Age, $M(Q_{25}\sim Q_{75})$ | Sex, male (%) | Follow-Up, Mouth | Resection width |           | Lymph node metastasis, n | Adjuvant radiotherapy/chemotherapy |
|------|---------|----------------|-----------------------------|---------------|------------------|-----------------|-----------|--------------------------|------------------------------------|
|      |         |                |                             |               |                  | $\geq 10$ mm    | $< 10$ mm |                          |                                    |
| 2008 | Austria | 53             | 63.2 (33.3-85.8)            | 29 (39)       | 1-64             | 15              | 38        | NR                       | NR                                 |
| 2020 | Korea   | 63             | 61.4 (27-82)                | 41 (65)       | NR               | 23              | 40        | 13                       | NR                                 |
| 2025 | France  | 161            | NR                          | 108 (51)      | NR               | 45              | 116       | 47                       | NC: 12<br>AC: 51                   |
| 2019 | USA     | 440            | NR                          | 302 (52)      | NR               | 174             | 266       | NR                       | AC: 212<br>AR: 44                  |
| 2016 | China   | 95             | 61 (25-79)                  | 58 (54)       | 1-60             | NR              | NR        | NR                       | NR                                 |
| 2020 | China   | 109            | NR                          | 66 (52)       | 1-54             | 17              | 92        | NR                       | NC: 1                              |
| 2020 | Japan   | 635            | 64.2 (32.3-84.4)            | 388 (61)      | 1-84             | 237             | 398       | 152                      | NR                                 |
| 2020 | USA     | 131            | NR                          | NR            | 0-24             | 22              | 109       | NR                       | PC: 3                              |
| 2021 | China   | 478            | 58 (49-64)                  | 287 (60)      | NR               | 195             | 283       | NR                       | NR                                 |

## Meta-analysis results

### OS

9 included studies all related to the influence of surgical margin width on the OS of ICC patients. This meta-analysis synthesized relevant data by categorizing margin width into  $< 10$  mm and  $\geq 10$  mm groups, and the former was further categorized into three



subgroups: <5 mm (1-4 mm, three studies) 5-9 mm ( $\geq 5$  mm, three studies) and <10 mm (five studies). There was no overall heterogeneity in the included studies ( $I^2=14.6\%$ ,  $P=0.305$ ). The fixed effect model meta-analysis indicated that, compared with the wide margin group ( $\geq 10$  mm), pooled HR of the narrow margin group (<10 mm) stood at 1.54 (95%CI: 1.34-1.77). No significant heterogeneity was found across three subgroups, <5 mm ( $I^2=0.0\%$ ,  $P=0.839$ ), 5-9 mm ( $I^2=0.0\%$ ,  $P=0.394$ ), and <10 mm ( $I^2=31.8\%$ ,  $P=0.209$ ) groups. Compared with the wide margin group, pooled HR of three subgroups (<5 mm, 5-9 mm and <10 mm groups) were 1.88 (95%CI: 1.45-2.42), 1.33 (95%CI: 1.03-1.72) and 1.49 (95%CI: 1.20-1.84), respectively, as Figure 2 showed.

### DFS

Two included studies relating to the influence of margin width on DFS of ICC patients showed no overall heterogeneity ( $I^2=0.0\%$ ,  $P=0.926$ ). According to the result of the fixed effect model in Figure 3, with the wide margin group ( $\geq 10$  mm) as the control, the overall pooled HR of the narrow margin group (<10 mm) was 1.51 (95%CI: 1.14-2.00) (Figure 3).

### RFS

With five included studies concerning the influence of margin width on RFS of ICC patients, we categorized the outcome variable in the same way as we conducted study on OS. With no heterogeneity across the included studies ( $I^2=0.0\%$ ,  $P=0.443$ ), the pooled HR was 1.35 (95%CI: 1.19-1.54). The fixed effect model of subgroup analysis found no heterogeneity across <5 mm ( $I^2=0.0\%$ ,  $P=0.576$ ) and 5-9 mm ( $I^2=0.0\%$ ,  $P=0.450$ ) groups. Compared with the wide margin group ( $\geq 10$  mm), pooled HR of <5 mm and 5-9 mm groups were 1.38 (95%CI: 1.07-1.78) and 1.39 (95%CI: 1.11-1.74), respectively. With heterogeneity ( $I^2=57.7\%$ ,  $P=0.094$ ) in the narrow margin (<10 mm) group, compared with the wide margin ( $\geq 10$  mm) group, the pooled HR of the narrow margin group was found to be 1.30 (95%CI: 1.06-1.60) in comparison with the wide margin group ( $\geq 10$  mm) (Figure 4).

## Correlation between lymph node status and prognosis

Subsequently, a subgroup analysis was done on the prognostic impact related to lymph node status. When there was moderate heterogeneity in the effect of lymph node lesions on OS ( $I^2=57.5\%$ ,  $P=0.051$ ) according to the pooled HR and 95%CI of the multiple analyses of five positive lymph nodes, a random effects model was used for subsequent analysis (Figure 5). The results illustrated that lymph node lesions were detrimental to OS in patients with ICC (HR: 1.44; 95% CI: 1.22-1.70). When there was no significant heterogeneity in the effect of lymph node invasion on OS ( $I^2=21.2\%$ ,  $P=0.281$ ), a fixed effects model was utilized (Figure 6). The results reported that patients with ICC in the presence of lymph node invasion had markedly shorter OS (HR: 2.14; 95% CI: 1.39-3.28). In addition, the pooled HR of RFS associated with lymph node metastasis was analyzed, and the results showed notable heterogeneity ( $I^2=85.2\%$ ,  $P=0.009$ ) (Figure 7). The results of the random effects model demonstrated that lymph node metastasis was detrimental to RFS in patients with ICC (HR: 1.31, 95% CI: 1.09-1.57).

## Sensitivity analysis

By excluding one study at a time, a sensitivity analysis of OS and RFS was conducted. Results in Figure 8-9 showed no significant difference between the effect size and the total effect size of OS and RFS, implying that the result reached in this study was relatively stable. Egger test did not detect substantial publication bias in both OS ( $P=0.508$ ) and RFS ( $P=0.523$ ), and the Begg funnel plot was symmetrical (Figures 10-11). However, differences based on the type of study (single-center and multicenter studies) and the limited number of studies may affect the above statistical results.

## Discussion

### Current status of surgery for ICC

The incidence and mortality rates of ICC keep climbing across the world, most patients are not diagnosed until ICC reached an advanced stage[1].

Currently, complete surgical resection with negative histological margins (R0)

remains the only curative treatment modality favoring long-term survival outcomes in ICC patients, but only a minority of patients have resectable lesions, resulting in poor postoperative survival[5,17]. A few studies have shown a better survival benefit for ICC patients undergoing R0 resection compared to R1 resection[2,12]. But margin status, lymph node status, and the presence of vascular invasion all contribute to the poor prognosis of ICC patients after resection[18-20]. Most patients with ICC usually require adjuvant therapy[21]. In addition, investigators are concerned that in ICC patients undergoing R0 resection, the margin width also affects long-term survival after surgery[8,15]. However, there has been controversy regarding the effect of R0 margin width on the prognostic survival of ICC patients. Thus, this meta-analysis was done to investigate the effect of margin width on survival outcomes after ICC resection.

### **The impact of margin width on ICC patients' outcomes**

In 2016, Tang *et al.*[11] published the first meta-analysis of the effect of margin width on prognostic survival in ICC patients. This study indicated that patients with wide margin ( $\geq 10$  mm) have a survival advantage over those with narrow margin ( $< 10$  mm) (HR: 1.59, 95%CI: 1.09-2.32). Based on these investigations, we updated the study related to the effect of surgical margin width on the prognosis survival of ICC patients. Two irrelevant studies with a limited sample size in the 2016 meta-analysis were excluded and five eligible retrospective cohort studies published after 2016 were included. Besides, this study also filled the void of RFS (4 included studies) and DFS (2 included studies).

9 included studies all focused on the mass-forming (MF) type of ICC (as it accounts for over 66% of ICC[1]) and categorized the outcome variable into 5 groups:  $< 1$  mm, 1-4 mm, 5-9 mm,  $< 10$  mm and  $\geq 10$  mm. One included study went beyond our research scope as it further categorized wide margin into  $\geq 15$  mm group, and relevant data were excluded from the meta-analysis. Pooled HR results indicated that with the wide margin ( $\geq 10$  mm) group as the control, patients with a margin shorter than 10 mm were prone to poor prognosis (pooled HR of OS: 1.54, 95%CI: 1.34-1.77). It was demonstrated that ICC tumor cells could metastasize by directly infiltrating the adjacent

1  
2  
3  
4 liver parenchyma, accompanied by vascular infiltration and perineural infiltration, and  
5 then cause pathological changes in intrahepatic epithelial cells and surrounding  
6 tissues[22]. For most metastasis is limited within 10 mm around the primary lesion, a  
7  
8 10 mm or more resection is expected to cure these ICC patients. Ma *et al.*[2] suggested  
9 that margin width significantly impacts the OS of ICC-MF patients after resection. With  
10 a margin width greater than 9 mm, OS increased from 35.7 months to 184.6 months.  
11 With a margin width of or greater than 10 mm, DFS increased from 14.1 months to 86  
12 months. In a single-center study, patients with a margin width  $\geq 10$  mm have longer OS  
13 (HR: 0.403, 95%CI: 0.191-0.854,  $P=0.018$ ) and RFS (HR: 0.470, 95%CI: 0.242-0.914,  
14  $P=0.026$ )[16]. Similarly, in the present study, analysis of the OS subgroup presented  
15 that the prognostic risk was substantially lower in patients in the 5-9 mm group (HR:  
16 1.33, 95% CI: 1.03-1.72) than in the group with margin width  $< 5$  mm (HR: 1.88, 95%  
17 CI: 1.45-2.42). But the difference was not noticeable in the RFS subgroup analysis.  
18 Therefore, margin width  $\geq 10$  mm could be the optimal margin width for prognosis.

### 31 **Correlation between lymph node status and prognosis**

32 A subgroup analysis of lymph node status was done. Several studies have reported that  
33 lymph node status, in addition to the margin width, is a pivotal prognostic risk factor  
34 affecting ICC patients after surgery[14,23]. Lymph node lesions, invasion, and  
35 metastasis were factors for poor prognosis after undergoing R0 resection. In a national  
36 survey by the Japanese Liver Cancer Study Group, surgical margin width has a small  
37 impact on the postoperative prognosis of ICC patients, but in patients without lymph  
38 node metastasis, wider surgical margins favored postoperative survival outcomes[9].  
39 Additionally, by comparing the basic information of patients in the wide and narrow-  
40 margin groups in this study, it was found that the wide-margin group had a higher  
41 proportion of patients with single tumors and smaller tumor diameters; in contrast,  
42 patients in the narrow-margin group had larger tumor diameters and invasion and a  
43 higher proportion of vascular invasion and advanced tumors, which may directly  
44 confound the comparison of prognostic survival times between the two groups. Liu  
45 (2021) *et al.*[8] conducted a statistical analysis of the clinical data of 478 ICC patients  
46 from 13 hepatobiliary and pancreatic centers and used the propensity score matching  
47  
48  
49  
50  
51  
52  
53  
54  
55  
56  
57  
58  
59  
60

1  
2  
3  
4 (PSM) method for pairwise inclusion at 1:1, matched other factors that may affect  
5 prognostic survival such as age, tumor type, and lymph node metastasis-without  
6 statistical differences, retaining only the difference in margin width (wide versus  
7 narrow margins with a 10-mm threshold) for comparison. The results showed that  
8 patients with wide margins had substantially improved OS and DFS compared to  
9 patients with narrow margin. But in an unpaired subgroup analysis, wide margins only  
10 improved the American Joint Committee on Cancer (AJCC) clinical stage I patients,  
11 and patients with lymphatic metastases did not benefit from wide margins. Therefore,  
12 we believed that setting the margin width at  $\geq 10$  mm may require reference to the  
13 patient's tumor type and lymphatic involvement, and 10 mm or larger margins can be  
14 achieved as much as possible in ICC patients without lymph node metastasis and single  
15 MF type to improve the patient's prognosis for long-term survival benefit.  
16  
17  
18  
19  
20  
21  
22  
23  
24  
25  
26

27 Adjuvant treatments such as chemotherapy, arterial chemoembolization, and  
28 chemoradiotherapy may be beneficial for the survival of postoperative ICC patients  
29 with margins as well as positive lymph nodes[21]. Recent meta-analysis results have  
30 suggested that lymph node dissection may not have a marked prognostic impact on  
31 patients with resectable ICC, but it is associated with postoperative recurrence[24,25].  
32 Hence, we speculated that adjuvant therapy for ICC patients may also influence the  
33 choice of margin width, but in our study, a subgroup analysis of adjuvant therapy was  
34 not conducted, as an ongoing study object.  
35  
36  
37  
38  
39  
40  
41  
42

### 43 **Sensitivity analysis**

44 Although the results of the sensitivity analysis did not show substantial differences  
45 between studies, the Spolverato (2015) 5-9 mm group in the OS sensitivity analysis[12]  
46 and the Tamandl (2008)  $< 10$  mm group in the RFS sensitivity analysis were slightly  
47 prominent[3]. The study by Spolverato (2015) *et al.*[12] reported that the 1-year OS  
48 rate of 100 patients who completed the 5-9 mm R0 margin (83.9%) was higher than the  
49 OS of 147 patients who completed the  $\geq 10$  mm R0 group (79.8%), which may be a  
50 factor influencing the OS comparison.  
51  
52  
53  
54  
55  
56  
57

### 58 **Limitations**

59 This study has some limitations. First, all the studies included in this study were  
60

1  
2  
3  
4 published in English, and the exclusion of non-English literature may lead to selection  
5 bias. Second, the presence of single-center and multicenter studies in this study may  
6 have contributed to some bias in the results. Third, factors such as type of liver resection,  
7 surgical instrumentation, and adjuvant treatment were not analyzed in subgroups, and  
8 the prognosis of ICC patients by the above factors was inconclusive and warranted  
9 further study. Fourth, the size, number, and location of preoperative tumors and their  
10 staging also varied, and evaluation of the impact of surgical margins on postoperative  
11 survival of ICC patients in terms of tumor pathological characteristics may be required.  
12 Finally, since survival data were mostly obtained indirectly through calculations, the  
13 conclusions may differ somewhat from clinical trials.  
14  
15  
16  
17  
18  
19  
20  
21  
22  
23  
24

### 25 **Conclusion**

26  
27 In conclusion, the meta-analysis revealed that patients undergoing curative  
28 hepatectomy for ICC had a survival advantage for a wide margin of  $\geq 10$  mm compared  
29 with a narrow margin of  $< 10$  mm under certain conditions. But surgeons should  
30 determine the margin width concerning the patient's condition and should not consider  
31  $< 10$  mm as a contraindication to surgery; in addition, lymph node status should be  
32 considered during clinical procedures, as it is also an important factor affecting the  
33 patient's postoperative survival outcome. In summary, surgical margins of  $\geq 10$  mm  
34 should be achieved as much as possible for ICC patients with negative lymph nodes,  
35 but further multicenter study results are still warranted to support this view.  
36  
37  
38  
39  
40  
41  
42  
43  
44  
45  
46  
47  
48  
49  
50  
51  
52  
53  
54  
55  
56  
57  
58  
59  
60

**Declarations****Ethics approval and consent to participate**

Not applicable.

**Consent for publication**

Not applicable.

**Data availability statement**

No additional data available.

**Competing interest**

The authors declare no competing interests.

**Funding**

None.

**Contributors**

JHJ drafting and revising the article, DZF data analysis, YTH gave final approval of the version to be published, and all authors agreed to be accountable for all aspects of the work.

## References

1. Cho SY, Park S-J, Kim SH *et al.* Survival Analysis of Intrahepatic Cholangiocarcinoma After Resection. *Annals of Surgical Oncology*, 17(7), 1823-1830 (2010).
2. Ma KW, Cheung TT, She WH *et al.* The effect of wide resection margin in patients with intrahepatic cholangiocarcinoma: A single-center experience. *Medicine (Baltimore)*, 95(28), e4133 (2016).
3. Tamandl D, Herberger B, Gruenberger B, Puhalla H, Klinger M, Gruenberger T. Influence of hepatic resection margin on recurrence and survival in intrahepatic cholangiocarcinoma. *Ann Surg Oncol*, 15(10), 2787-2794 (2008).
4. Farges O, Fuks D, Boleslawski E *et al.* Influence of surgical margins on outcome in patients with intrahepatic cholangiocarcinoma: a multicenter study by the AFC-IHCC-2009 study group. *Ann Surg*, 254(5), 824-829; discussion 830 (2011).
5. Zhang H, Yang T, Wu M, Shen F. Intrahepatic cholangiocarcinoma: Epidemiology, risk factors, diagnosis and surgical management. *Cancer Lett*, 379(2), 198-205 (2016).
6. Rahnamai-Azar AA, Weisbrod AB, Dillhoff M, Schmidt C, Pawlik TM. Intrahepatic cholangiocarcinoma: current management and emerging therapies. *Expert Rev Gastroenterol Hepatol*, 11(5), 439-449 (2017).
7. Zhu AX, Knox JJ. Adjuvant therapy for intrahepatic cholangiocarcinoma: the debate continues. *Oncologist*, 17(12), 1504-1507 (2012).
8. Liu H, Lin L, Lin Z *et al.* Impact of surgical margin width on long-term outcomes for intrahepatic cholangiocarcinoma: a multicenter study. *BMC Cancer*, 21(1), 840 (2021).
9. Watanabe Y, Matsuyama Y, Izumi N *et al.* Effect of surgical margin width after R0 resection for intrahepatic cholangiocarcinoma: A nationwide survey of the Liver Cancer Study Group of Japan. *Surgery*, 167(5), 793-802 (2020).
10. Li MX, Bi XY, Li ZY *et al.* Impaction of surgical margin status on the survival outcome after surgical resection of intrahepatic cholangiocarcinoma: a systematic review and meta-analysis. *J Surg Res*, 203(1), 163-173 (2016).
11. Tang H, Lu W, Li B, Meng X, Dong J. Influence of surgical margins on overall survival after resection of intrahepatic cholangiocarcinoma: A meta-analysis. *Medicine*, 95(35), e4621 (2016).
12. Spolverato G, Yakoob MY, Kim Y *et al.* The Impact of Surgical Margin Status on Long-Term Outcome After Resection for Intrahepatic Cholangiocarcinoma. *Ann Surg Oncol*, 22(12), 4020-4028 (2015).
13. Tierney JF, Stewart LA, Ghersi D, Burdett S, Sydes MR. Practical methods for incorporating summary time-to-event data into meta-analysis. *Trials*, 8, 16 (2007).
14. Cho SY, Park SJ, Kim SH *et al.* Survival analysis of intrahepatic cholangiocarcinoma after resection. *Ann Surg Oncol*, 17(7), 1823-1830 (2010).
15. Bartsch F, Baumgart J, Hoppe-Lotichius M, Straub BK, Heinrich S, Lang H. Intrahepatic cholangiocarcinoma - influence of resection margin and tumor distance to the liver capsule on survival. *BMC surgery*, 20(1), 61 (2020).
16. Zhu H, Wang L, Wang M *et al.* Prognostic value of resection margin length after surgical resection for intrahepatic cholangiocarcinoma. *American journal of surgery*, 222(2), 383-389 (2021).



17. Hewitt DB, Brown ZJ, Pawlik TM. Surgical management of intrahepatic cholangiocarcinoma. *Expert Rev Anticancer Ther*, 22(1), 27-38 (2022).
18. Luo X, Yuan L, Wang Y, Ge R, Sun Y, Wei G. Survival outcomes and prognostic factors of surgical therapy for all potentially resectable intrahepatic cholangiocarcinoma: a large single-center cohort study. *J Gastrointest Surg*, 18(3), 562-572 (2014).
19. Hammad AY, Berger NG, Eastwood D *et al*. Is Radiotherapy Warranted Following Intrahepatic Cholangiocarcinoma Resection? The Impact of Surgical Margins and Lymph Node Status on Survival. *Ann Surg Oncol*, 23(Suppl 5), 912-920 (2016).
20. Wirasorn K, Ngamprasertchai T, Chindaprasirt J *et al*. Prognostic factors in resectable cholangiocarcinoma patients: Carcinoembryonic antigen, lymph node, surgical margin and chemotherapy. *World J Gastrointest Oncol*, 5(4), 81-87 (2013).
21. Ke Q, Lin N, Deng M, Wang L, Zeng Y, Liu J. The effect of adjuvant therapy for patients with intrahepatic cholangiocarcinoma after surgical resection: A systematic review and meta-analysis. *PLoS One*, 15(2), e0229292 (2020).
22. El-Diwany R, Pawlik TM, Ejaz A. Intrahepatic Cholangiocarcinoma. *Surgical oncology clinics of North America*, 28(4), 587-599 (2019).
23. Ali SM, Clark CJ, Mounajjed T *et al*. Model to predict survival after surgical resection of intrahepatic cholangiocarcinoma: the Mayo Clinic experience. *HPB (Oxford)*, 17(3), 244-250 (2015).
24. Li F, Jiang Y, Jiang L *et al*. Effect of lymph node resection on prognosis of resectable intrahepatic cholangiocarcinoma: A systematic review and meta-analysis. *Front Oncol*, 12, 957792 (2022).
25. Zhou R, Lu D, Li W *et al*. Is lymph node dissection necessary for resectable intrahepatic cholangiocarcinoma? A systematic review and meta-analysis. *HPB (Oxford)*, 21(7), 784-792 (2019).

## Figure titles

**Figure 1. PRISMA flowchart for the included studies**

**Figure 2. Results of HR pooled analysis of the OS rate of the included studies (with the wide margin group  $\geq 10$  mm as the control)**

**Figure 3. Results of HR pooled analysis of DFS in the included studies (with the wide margin group  $\geq 10$  mm as the control)**

**Figure 4. Results of HR pooled analysis of RFS in the included studies (with the wide margin group  $\geq 10$  mm as the control)**

**Figure 5. Results of HR pooled analysis of lymph node lesions on OS in patients with ICC (with the wide margin group  $\geq 10$  mm as the control)**

**Figure 6. Results of HR pooled analysis of lymph node invasion on OS in ICC patients (with the wide margin group  $\geq 10$  mm as the control)**

**Figure 7. Results of HR pooled analysis of lymph node metastasis on RFS in ICC patients**

1  
2  
3  
4 **(with the wide margin group  $\geq 10$  mm as the control)**

5 **Figure 8. Sensitivity analysis of OS after leave-out-one analyses**

6  
7 **Figure 9. Sensitivity analysis of RFS after leave-out-one analyses**

8  
9 **Figure 10. Funnel plot of the relationship between surgical margin width and OS in ICC**  
10 **patients**

11  
12  
13 **Figure 11. Funnel plot of the relationship between surgical margin width and RFS in ICC**  
14 **patients**

15  
16  
17  
18  
19  
20  
21  
22  
23  
24  
25  
26  
27  
28  
29  
30  
31  
32  
33  
34  
35  
36  
37  
38  
39  
40  
41  
42  
43  
44  
45  
46  
47  
48  
49  
50  
51  
52  
53  
54  
55  
56  
57  
58  
59  
60

For peer review only

1  
2  
3  
4  
5  
6  
7  
8  
9  
10  
11  
12  
13  
14  
15  
16  
17  
18  
19  
20  
21  
22  
23  
24  
25  
26  
27  
28  
29  
30  
31  
32  
33  
34  
35  
36  
37  
38  
39  
40  
41  
42  
43  
44  
45  
46  
47  
48  
49  
50  
51  
52  
53  
54  
55  
56  
57  
58  
59  
60

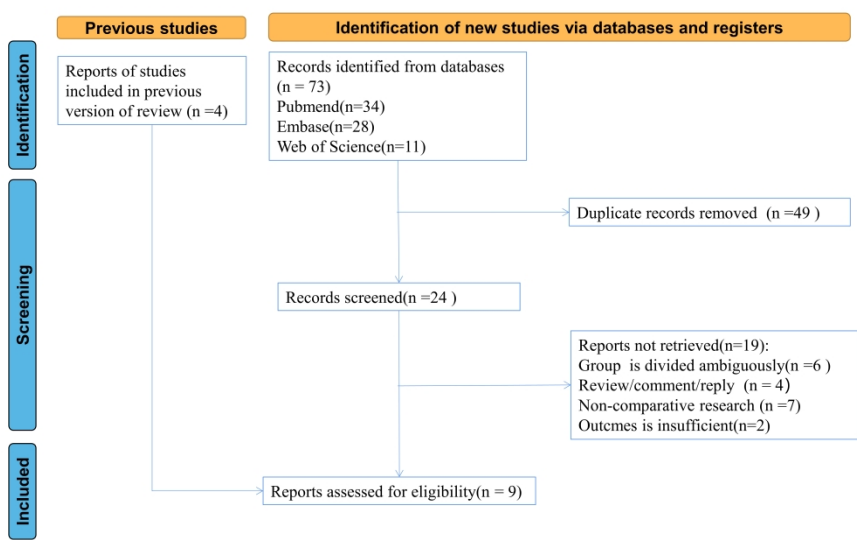

Figure 1. PRISMA flowchart for the included studies

338x190mm (600 x 600 DPI)

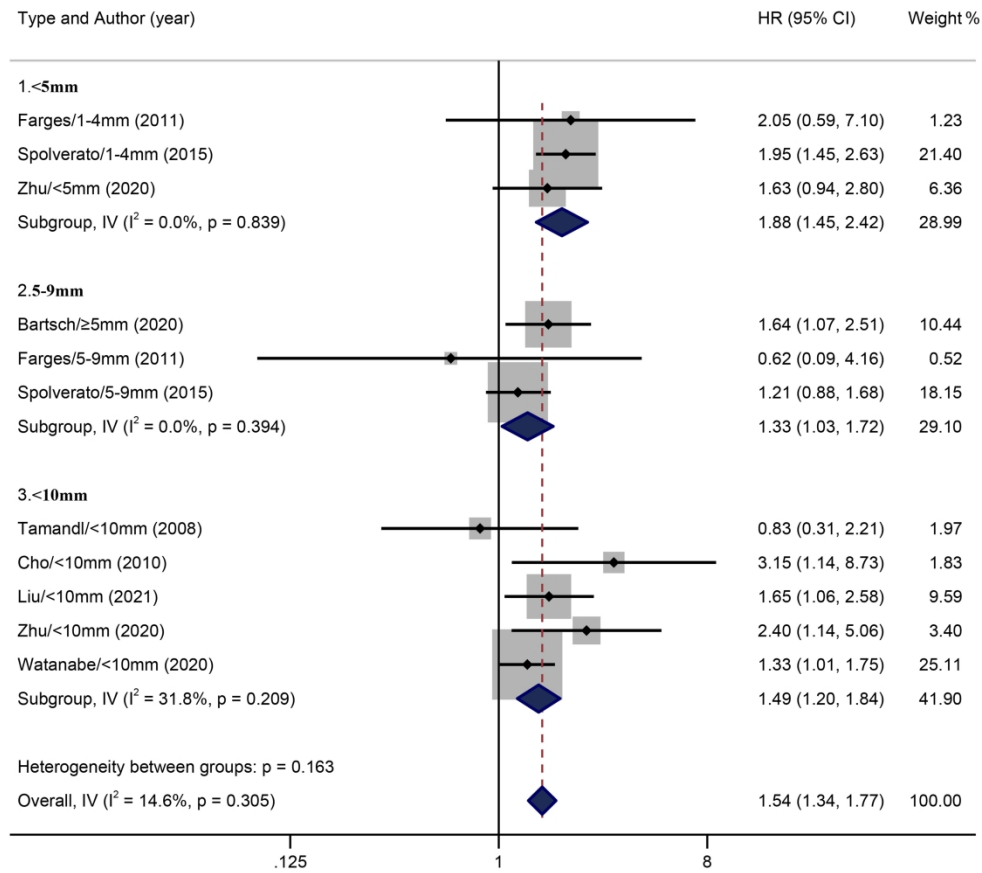

Figure 2. Results of HR pooled analysis of the OS rate of the included studies (with the wide margin group  $\geq 10$  mm as the control)

180x160mm (600 x 600 DPI)

1  
2  
3  
4  
5  
6  
7  
8  
9  
10  
11  
12  
13  
14  
15  
16  
17  
18  
19  
20  
21  
22  
23  
24  
25  
26  
27  
28  
29  
30  
31  
32  
33  
34  
35  
36  
37  
38  
39  
40  
41  
42  
43  
44  
45  
46  
47  
48  
49  
50  
51  
52  
53  
54  
55  
56  
57  
58  
59  
60

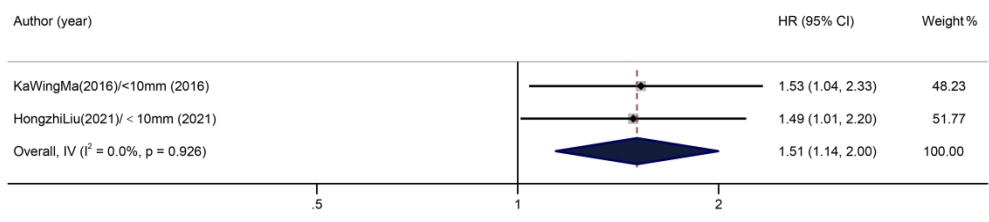

Figure 3. Results of HR pooled analysis of DFS in the included studies (with the wide margin group  $\geq 10$  mm as the control)

314x68mm (600 x 600 DPI)

1  
2  
3  
4  
5  
6  
7  
8  
9  
10  
11  
12  
13  
14  
15  
16  
17  
18  
19  
20  
21  
22  
23  
24  
25  
26  
27  
28  
29  
30  
31  
32  
33  
34  
35  
36  
37  
38  
39  
40  
41  
42  
43  
44  
45  
46  
47  
48  
49  
50  
51  
52  
53  
54  
55  
56  
57  
58  
59  
60

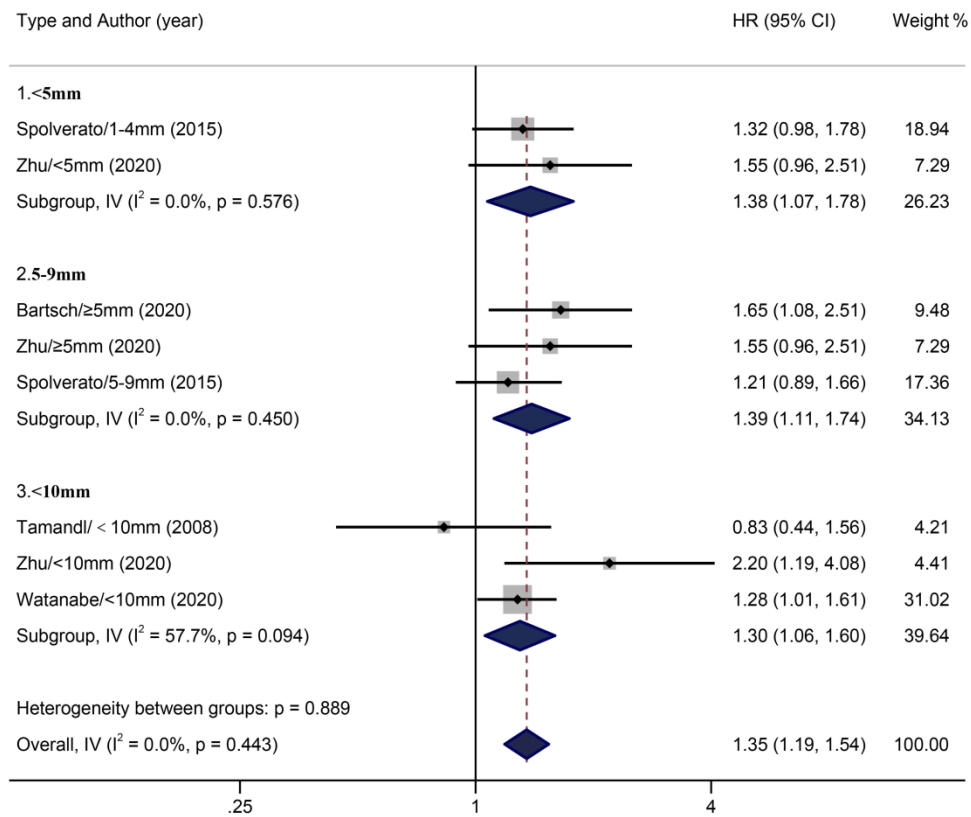

Figure 4. Results of HR pooled analysis of RFS in the included studies (with the wide margin group  $\geq 10$  mm as the control)

196x165mm (600 x 600 DPI)

1  
2  
3  
4  
5  
6  
7  
8  
9  
10  
11  
12  
13  
14  
15  
16  
17  
18  
19  
20  
21  
22  
23  
24  
25  
26  
27  
28  
29  
30  
31  
32  
33  
34  
35  
36  
37  
38  
39  
40  
41  
42  
43  
44  
45  
46  
47  
48  
49  
50  
51  
52  
53  
54  
55  
56  
57  
58  
59  
60

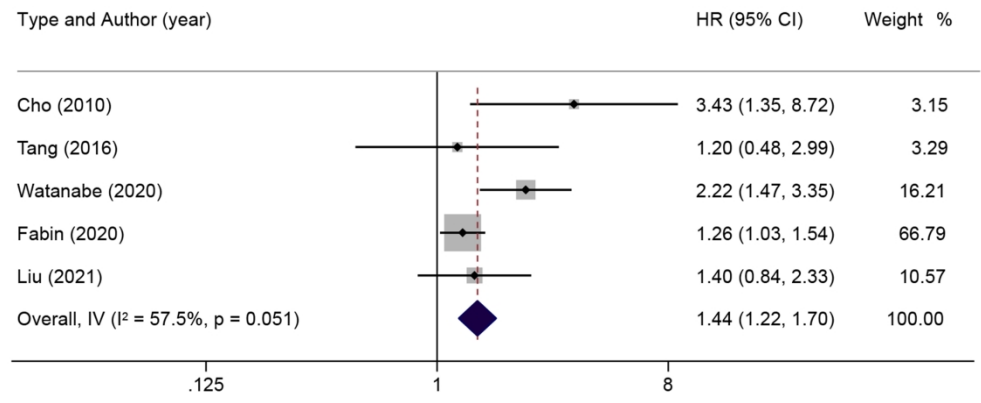

Figure 5. Results of HR pooled analysis of lymph node lesions on OS in patients with ICC (with the wide margin group  $\geq 10$  mm as the control)

210x87mm (600 x 600 DPI)

1  
2  
3  
4  
5  
6  
7  
8  
9  
10  
11  
12  
13  
14  
15  
16  
17  
18  
19  
20  
21  
22  
23  
24  
25  
26  
27  
28  
29  
30  
31  
32  
33  
34  
35  
36  
37  
38  
39  
40  
41  
42  
43  
44  
45  
46  
47  
48  
49  
50  
51  
52  
53  
54  
55  
56  
57  
58  
59  
60

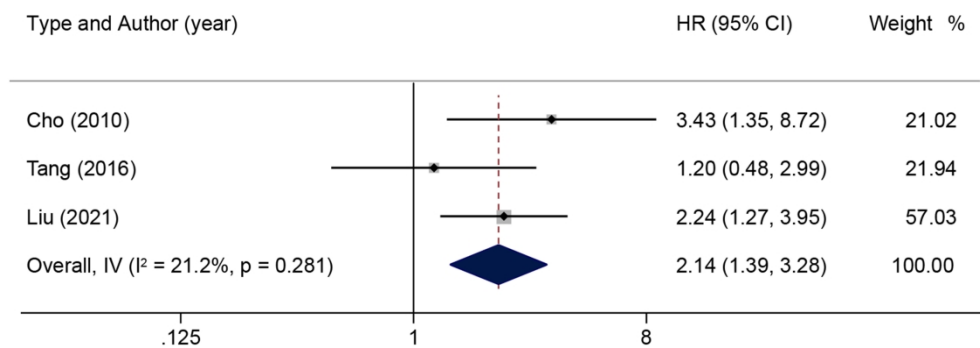

Figure 6. Results of HR pooled analysis of lymph node invasion on OS in ICC patients (with the wide margin group  $\geq 10$  mm as the control)

199x77mm (600 x 600 DPI)



1  
2  
3  
4  
5  
6  
7  
8  
9  
10  
11  
12  
13  
14  
15  
16  
17  
18  
19  
20  
21  
22  
23  
24  
25  
26  
27  
28  
29  
30  
31  
32  
33  
34  
35  
36  
37  
38  
39  
40  
41  
42  
43  
44  
45  
46  
47  
48  
49  
50  
51  
52  
53  
54  
55  
56  
57  
58  
59  
60

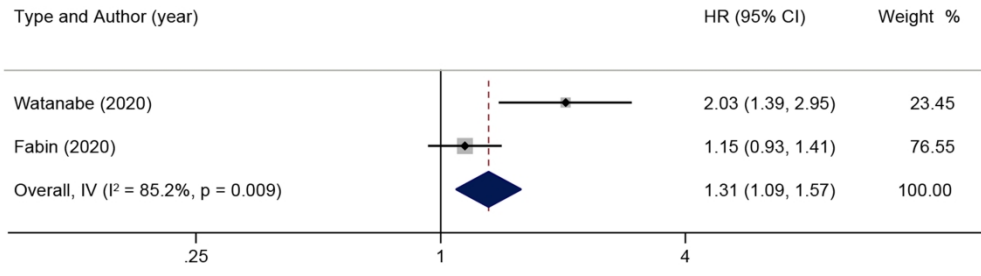

Figure 7. Results of HR pooled analysis of lymph node metastasis on RFS in ICC patients (with the wide margin group ≥10 mm as the control)

231x66mm (600 x 600 DPI)

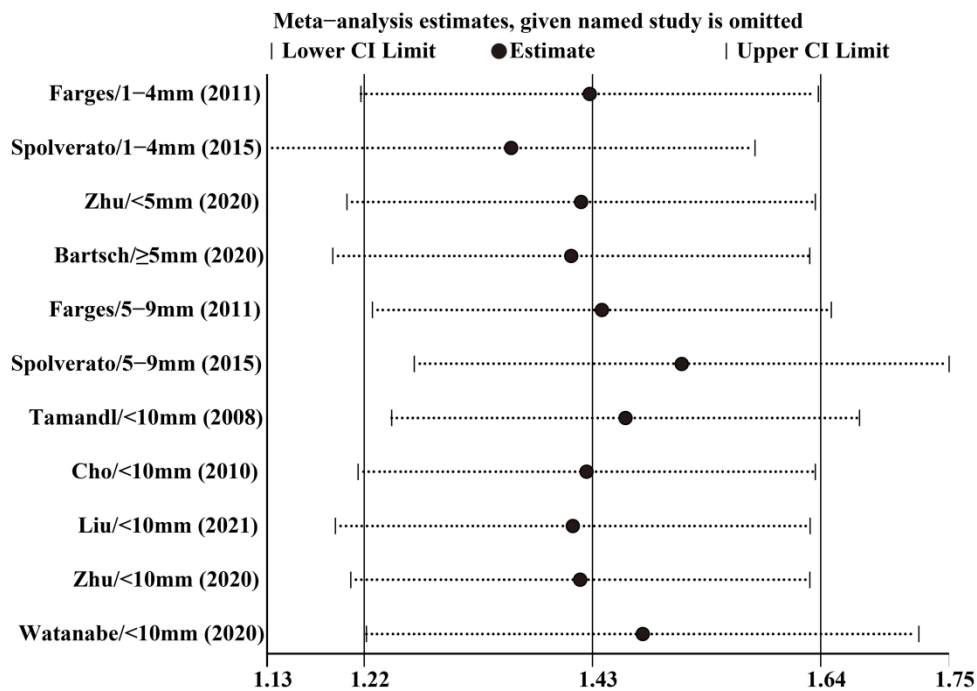

Figure 8. Sensitivity analysis of OS after leave-out-one analyses

221x156mm (600 x 600 DPI)

1  
2  
3  
4  
5  
6  
7  
8  
9  
10  
11  
12  
13  
14  
15  
16  
17  
18  
19  
20  
21  
22  
23  
24  
25  
26  
27  
28  
29  
30  
31  
32  
33  
34  
35  
36  
37  
38  
39  
40  
41  
42  
43  
44  
45  
46  
47  
48  
49  
50  
51  
52  
53  
54  
55  
56  
57  
58  
59  
60

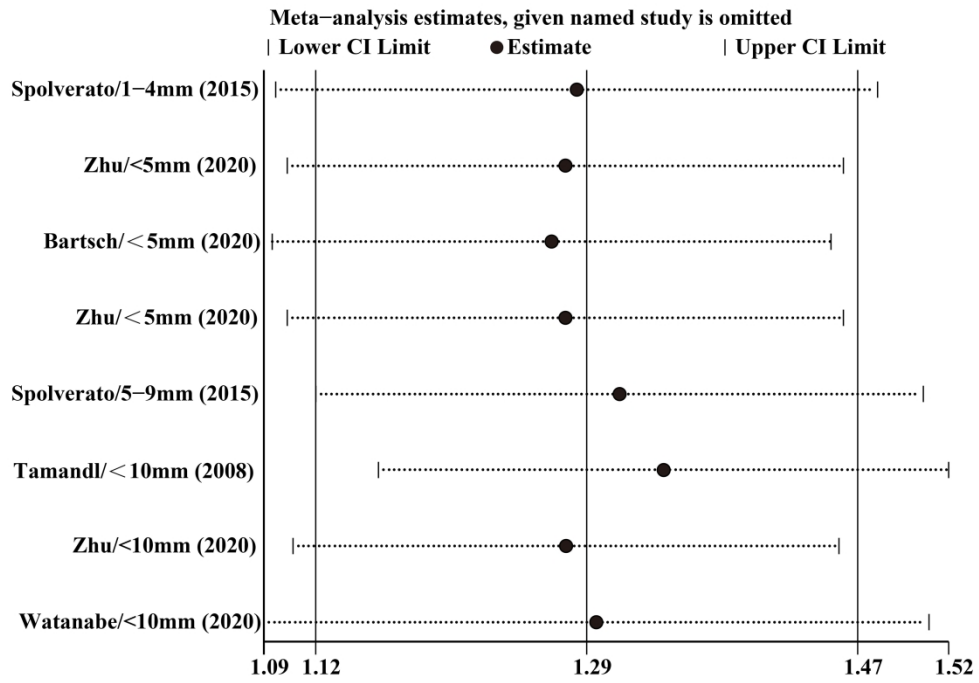

Figure 9. Sensitivity analysis of RFS after leave-out-one analyses

231x164mm (600 x 600 DPI)

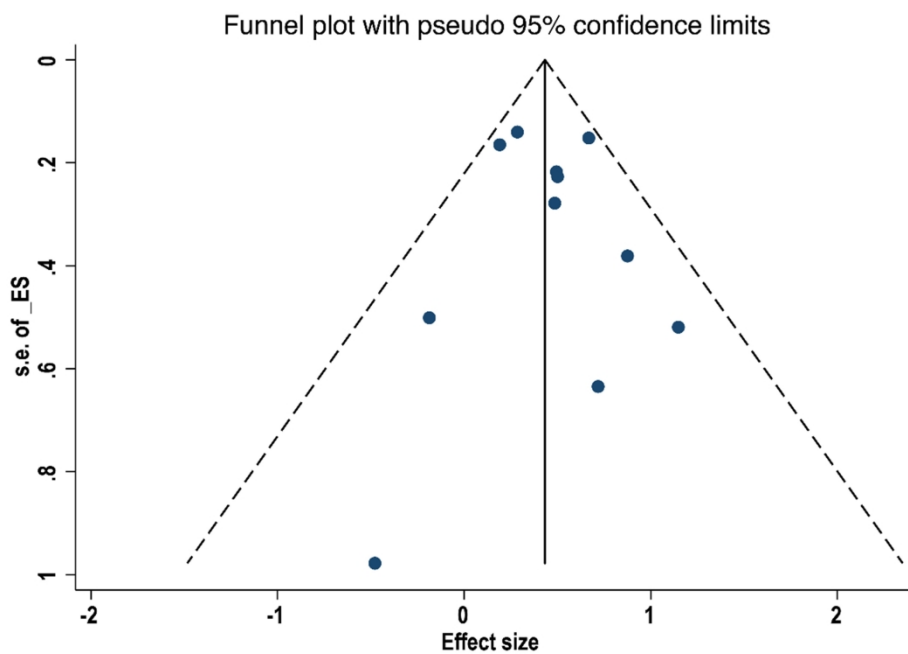

Figure 10. Funnel plot of the relationship between surgical margin width and OS in ICC patients

145x103mm (600 x 600 DPI)

1  
2  
3  
4  
5  
6  
7  
8  
9  
10  
11  
12  
13  
14  
15  
16  
17  
18  
19  
20  
21  
22  
23  
24  
25  
26  
27  
28  
29  
30  
31  
32  
33  
34  
35  
36  
37  
38  
39  
40  
41  
42  
43  
44  
45  
46  
47  
48  
49  
50  
51  
52  
53  
54  
55  
56  
57  
58  
59  
60

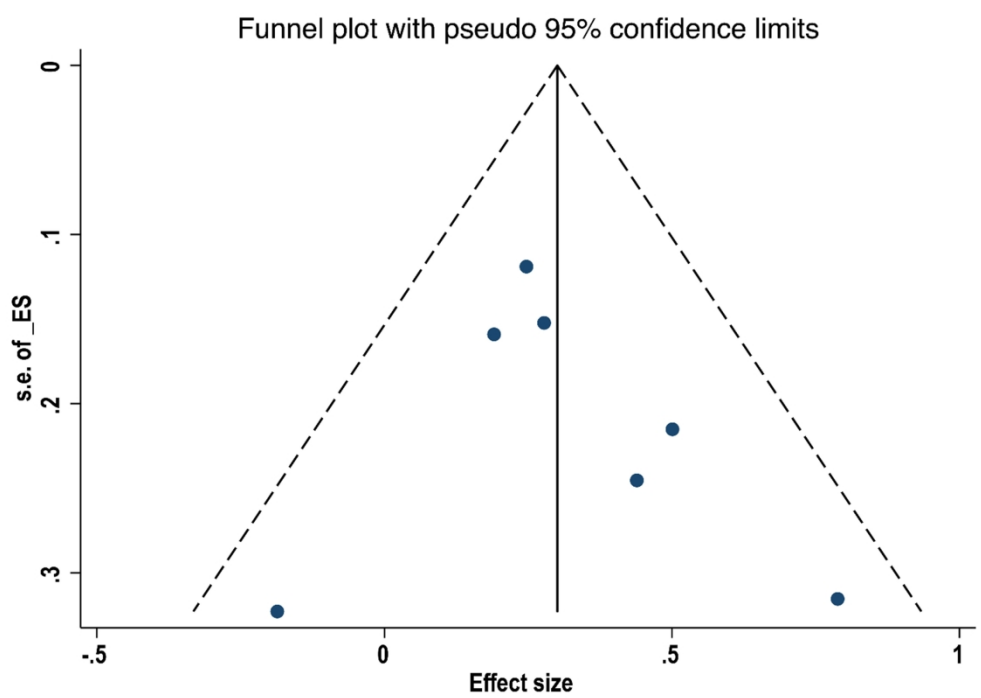

Figure 11. Funnel plot of the relationship between surgical margin width and RFS in ICC patients  
167x119mm (600 x 600 DPI)

### Surgical margin width – search strategy

Using the MeSH subject heading function in the National Library of Medicine:

1. The subject heading for searching “intrahepatic cholangiocarcinoma” was “Cholangiocarcinoma”. The free words were “Cholangiocarcinomas”, “Cholangiocellular Carcinoma”, “Intrahepatic Cholangiocarcinoma”, “Cholangiocarcinomas, Intrahepatic”.

2. Search in combination with keywords such as “surgery”, “resection margin width”, and “resection margin length”.

3. Search strategy for Pubmed:

(((((Cholangiocarcinomas) OR (Cholangiocellular Carcinoma)) OR (Intrahepatic Cholangiocarcinoma)) OR (Cholangiocarcinomas, Intrahepatic)) AND (Surgical margin width)) OR (Length of surgical margin)

4. Search strategy for Embase:

Cholangiocarcinomas:ti,ab,kw OR ‘Cholangiocellular Carcinoma’:ti,ab,kw OR ‘Intrahepatic Cholangiocarcinoma’:ti,ab,kw OR ‘Cholangiocarcinomas, Intrahepatic’:ti,ab,kw AND ‘Surgical margin width’

5. Search strategy for Web of Science:

((TS=(Cholangiocarcinomas)) OR TS=(Cholangiocellular Carcinoma)) OR TS=(Intrahepatic Cholangiocarcinoma)) AND TS=(Surgical margin width)

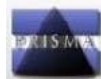

## PRISMA 2020 Checklist

| Section and Topic             | Item # | Checklist item                                                                                                                                                                                                                                                                                       | Location where item is reported |
|-------------------------------|--------|------------------------------------------------------------------------------------------------------------------------------------------------------------------------------------------------------------------------------------------------------------------------------------------------------|---------------------------------|
| <b>TITLE</b>                  |        |                                                                                                                                                                                                                                                                                                      |                                 |
| Title                         | 1      | Identify the report as a systematic review.                                                                                                                                                                                                                                                          | 1                               |
| <b>ABSTRACT</b>               |        |                                                                                                                                                                                                                                                                                                      |                                 |
| Abstract                      | 2      | See the PRISMA 2020 for Abstracts checklist.                                                                                                                                                                                                                                                         | 2-3                             |
| <b>INTRODUCTION</b>           |        |                                                                                                                                                                                                                                                                                                      |                                 |
| Rationale                     | 3      | Describe the rationale for the review in the context of existing knowledge.                                                                                                                                                                                                                          | 3-4                             |
| Objectives                    | 4      | Provide an explicit statement of the objective(s) or question(s) the review addresses.                                                                                                                                                                                                               | 4                               |
| <b>METHODS</b>                |        |                                                                                                                                                                                                                                                                                                      |                                 |
| Eligibility criteria          | 5      | Specify the inclusion and exclusion criteria for the review and how studies were grouped for the syntheses.                                                                                                                                                                                          | 5                               |
| Information sources           | 6      | Specify all databases, registers, websites, organisations, reference lists and other sources searched or consulted to identify studies. Specify the date when each source was last searched or consulted.                                                                                            | 5                               |
| Search strategy               | 7      | Present the full search strategies for all databases, registers and websites, including any filters and limits used.                                                                                                                                                                                 | 5                               |
| Selection process             | 8      | Specify the methods used to decide whether a study met the inclusion criteria of the review, including how many reviewers screened each record and each report retrieved, whether they worked independently, and if applicable, details of automation tools used in the process.                     | 5                               |
| Data collection process       | 9      | Specify the methods used to collect data from reports, including how many reviewers collected data from each report, whether they worked independently, any processes for obtaining or confirming data from study investigators, and if applicable, details of automation tools used in the process. | 6                               |
| Data items                    | 10a    | List and define all outcomes for which data were sought. Specify whether all results that were compatible with each outcome domain in each study were sought (e.g. for all measures, time points, analyses), and if not, the methods used to decide which results to collect.                        | 6                               |
|                               | 10b    | List and define all other variables for which data were sought (e.g. participant and intervention characteristics, funding sources). Describe any assumptions made about any missing or unclear information.                                                                                         | 6                               |
| Study risk of bias assessment | 11     | Specify the methods used to assess risk of bias in the included studies, including details of the tool(s) used, how many reviewers assessed each study and whether they worked independently, and if applicable, details of automation tools used in the process.                                    | 6-7                             |
| Effect measures               | 12     | Specify for each outcome the effect measure(s) (e.g. risk ratio, mean difference) used in the synthesis or presentation of results.                                                                                                                                                                  | 6-7                             |
| Synthesis methods             | 13a    | Describe the processes used to decide which studies were eligible for each synthesis (e.g. tabulating the study intervention characteristics and comparing against the planned groups for each synthesis (item #5)).                                                                                 | 7                               |
|                               | 13b    | Describe any methods required to prepare the data for presentation or synthesis, such as handling of missing summary statistics, or data conversions.                                                                                                                                                | 7                               |
|                               | 13c    | Describe any methods used to tabulate or visually display results of individual studies and syntheses.                                                                                                                                                                                               | 7                               |
|                               | 13d    | Describe any methods used to synthesize results and provide a rationale for the choice(s). If meta-analysis was performed, describe the model(s), method(s) to identify the presence and extent of statistical heterogeneity, and software package(s) used.                                          | 7                               |
|                               | 13e    | Describe any methods used to explore possible causes of heterogeneity among study results (e.g. subgroup analysis, meta-regression).                                                                                                                                                                 | 7                               |
|                               | 13f    | Describe any sensitivity analyses conducted to assess robustness of the synthesized results.                                                                                                                                                                                                         | 7                               |
| Reporting bias assessment     | 14     | Describe any methods used to assess risk of bias due to missing results in a synthesis (arising from reporting biases).                                                                                                                                                                              | 7                               |
| Certainty assessment          | 15     | Describe any methods used to assess certainty (or confidence) in the body of evidence for an outcome.                                                                                                                                                                                                | 7                               |

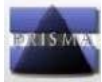

## PRISMA 2020 Checklist

1  
2  
3  
4  
5  
6  
7  
8  
9  
10  
11  
12  
13  
14  
15  
16  
17  
18  
19  
20  
21  
22  
23  
24  
25  
26  
27  
28  
29  
30  
31  
32  
33  
34  
35  
36  
37  
38  
39  
40  
41  
42  
43  
44  
45  
46  
47

| Section and Topic                              | Item # | Checklist item                                                                                                                                                                                                                                                                       | Location where item is reported |
|------------------------------------------------|--------|--------------------------------------------------------------------------------------------------------------------------------------------------------------------------------------------------------------------------------------------------------------------------------------|---------------------------------|
| <b>RESULTS</b>                                 |        |                                                                                                                                                                                                                                                                                      |                                 |
| Study selection                                | 16a    | Describe the results of the search and selection process, from the number of records identified in the search to the number of studies included in the review, ideally using a flow diagram.                                                                                         | 7-8                             |
|                                                | 16b    | Cite studies that might appear to meet the inclusion criteria, but which were excluded, and explain why they were excluded.                                                                                                                                                          | 7-8                             |
| Study characteristics                          | 17     | Cite each included study and present its characteristics.                                                                                                                                                                                                                            | 8-9                             |
| Risk of bias in studies                        | 18     | Present assessments of risk of bias for each included study.                                                                                                                                                                                                                         | 7-8                             |
| Results of individual studies                  | 19     | For all outcomes, present, for each study: (a) summary statistics for each group (where appropriate) and (b) an effect estimate and its precision (e.g. confidence/credible interval), ideally using structured tables or plots.                                                     | 9-11                            |
| Results of syntheses                           | 20a    | For each synthesis, briefly summarise the characteristics and risk of bias among contributing studies.                                                                                                                                                                               | 9-11                            |
|                                                | 20b    | Present results of all statistical syntheses conducted. If meta-analysis was done, present for each the summary estimate and its precision (e.g. confidence/credible interval) and measures of statistical heterogeneity. If comparing groups, describe the direction of the effect. | 9-11                            |
|                                                | 20c    | Present results of all investigations of possible causes of heterogeneity among study results.                                                                                                                                                                                       | 9-11                            |
|                                                | 20d    | Present results of all sensitivity analyses conducted to assess the robustness of the synthesized results.                                                                                                                                                                           | 11                              |
| Reporting biases                               | 21     | Present assessments of risk of bias due to missing results (arising from reporting biases) for each synthesis assessed.                                                                                                                                                              | 9-11                            |
| Certainty of evidence                          | 22     | Present assessments of certainty (or confidence) in the body of evidence for each outcome assessed.                                                                                                                                                                                  | 9-11                            |
| <b>DISCUSSION</b>                              |        |                                                                                                                                                                                                                                                                                      |                                 |
| Discussion                                     | 23a    | Provide a general interpretation of the results in the context of other evidence.                                                                                                                                                                                                    | 11-12                           |
|                                                | 23b    | Discuss any limitations of the evidence included in the review.                                                                                                                                                                                                                      | 15                              |
|                                                | 23c    | Discuss any limitations of the review processes used.                                                                                                                                                                                                                                | 15                              |
|                                                | 23d    | Discuss implications of the results for practice, policy, and future research.                                                                                                                                                                                                       | 12-14                           |
| <b>OTHER INFORMATION</b>                       |        |                                                                                                                                                                                                                                                                                      |                                 |
| Registration and protocol                      | 24a    | Provide registration information for the review, including register name and registration number, or state that the review was not registered.                                                                                                                                       | 16                              |
|                                                | 24b    | Indicate where the review protocol can be accessed, or state that a protocol was not prepared.                                                                                                                                                                                       | 16                              |
|                                                | 24c    | Describe and explain any amendments to information provided at registration or in the protocol.                                                                                                                                                                                      | 16                              |
| Support                                        | 25     | Describe sources of financial or non-financial support for the review, and the role of the funders or sponsors in the review.                                                                                                                                                        | 16                              |
| Competing interests                            | 26     | Declare any competing interests of review authors.                                                                                                                                                                                                                                   | 16                              |
| Availability of data, code and other materials | 27     | Report which of the following are publicly available and where they can be found: template data collection forms; data extracted from included studies; data used for all analyses; analytic code; any other materials used in the review.                                           | 16                              |

From: Page MJ, McKenzie JE, Bossuyt PM, Boutron I, Hoffmann TC, Mulrow CD, et al. The PRISMA 2020 statement: an updated guideline for reporting systematic reviews. *BMJ* 2021;372:n71. doi: 10.1136/bmj.n71

For more information, visit: <http://www.prisma-statement.org/>  
For peer review only - <http://bmjopen.bmj.com/site/about/guidelines.xhtml>
