# Supplementary material for: Influence of surgical margin width on survival rate after resection of intrahepatic cholangiocarcinoma: a systematic review and meta-analysis
Source: PubMed Central journal article supplement — BMJ Open. 2023 May 8;13(5):e067222. doi: 10.1136/bmjopen-2022-067222 (PMC10174020; doi:10.1136/bmjopen-2022-067222), 2023-05-08
Supplement: bmjopen-2022-067222supp001.pdf [file bmjopen-2022-067222supp001.pdf]

### **Surgical margin width – search strategy**

Using the MeSH subject heading function in the National Library of Medicine:

1. The subject heading for searching “intrahepatic cholangiocarcinoma” was “Cholangiocarcinoma”. The free words were “Cholangiocarcinomas”, “Cholangiocellular Carcinoma”, “Intrahepatic Cholangiocarcinoma”, “Cholangiocarcinomas, Intrahepatic”.

2. Search in combination with keywords such as “surgery”, “resection margin width”, and “resection margin length”.

3. Search strategy for Pubmed:

(((((Cholangiocarcinomas) OR (Cholangiocellular Carcinoma)) OR (Intrahepatic Cholangiocarcinoma)) OR (Cholangiocarcinomas, Intrahepatic)) AND (Surgical margin width))  
OR (Length of surgical margin)

4. Search strategy for Embase:

Cholangiocarcinomas:ti,ab,kw OR ‘Cholangiocellular Carcinoma’:ti,ab,kw OR ‘Intrahepatic Cholangiocarcinoma’:ti,ab,kw OR ‘Cholangiocarcinomas, Intrahepatic’:ti,ab,kw AND ‘Surgical margin width’

5. Search strategy for Web of Science:

((TS=(Cholangiocarcinomas)) OR TS=(Cholangiocellular Carcinoma)) OR TS=(Intrahepatic Cholangiocarcinoma)) AND TS=(Surgical margin width)
